1           **Cold-Inducible RNA-binding protein (CIRBP) adjusts clock gene**  
2           **expression and REM sleep recovery following sleep deprivation**

3  
4  
5  
6                           Marieke MB Hoekstra, Yann Emmenegger, Paul Franken

7  
8                           Center for Integrative Genomics, University of Lausanne, Lausanne, Switzerland

9  
10                           Corresponding author: [paul.franken@unil.ch](mailto:paul.franken@unil.ch)

11  
12                           Short title: *Cirbp* adjusts SD-induced changes in clock gene expression

13  
14  
15

## 16 Abstract

17 Sleep depriving mice affects clock gene expression, suggesting that these genes partake in sleep  
18 homeostasis. The mechanisms linking wakefulness to clock gene expression are, however, not well  
19 understood. We propose CIRBP because its rhythmic expression is i) sleep-wake driven and ii) necessary for  
20 high-amplitude clock gene expression *in vitro*. We therefore expect *Cirbp* knock-out (KO) mice to exhibit  
21 attenuated sleep-deprivation (SD) induced changes in clock gene expression, and consequently to differ in  
22 their sleep homeostatic regulation. Lack of CIRBP indeed blunted the SD-incurred changes in cortical  
23 expression of the clock gene *Rev-erb $\alpha$*  whereas it amplified the changes in *Per2* and *Clock*. Concerning sleep  
24 homeostasis, KO mice accrued only half the extra REM sleep wild-type (WT) littermates obtained during  
25 recovery. Unexpectedly, KO mice were more active during lights-off which was accompanied by an  
26 acceleration of theta oscillations. Thus, CIRBP adjusts cortical clock gene expression after SD and expedites  
27 REM sleep recovery.

28  
29 **Keywords:** mice, sleep, *Cirbp*, cortical temperature, clock genes, locomotor activity, REM sleep, circadian  
30 rhythms

31  
32

## 33 Introduction

34  
35 The sleep-wake distribution is coordinated by the interaction of a circadian and a sleep  
36 homeostatic process (Daan et al., 1984). The molecular basis of the circadian process consists of  
37 clock genes that interact through transcriptional/translational feedback loops.  
38 CLOCK/NPAS2:BMAL1 heterodimers drive the transcription of many target genes, among which  
39 *Period* (*Per1-2*), *Cryptochrome* (*Cry1, -2*), and *Rev-Erb* (*Nr1d1, -2*). Subsequently, PER:CRY complexes  
40 inhibit CLOCK/NPAS2:BMAL1 transcriptional activity and thus prevent their own transcription.  
41 Through another loop, other clock components such as the transcriptional repressor REV-ERB $\alpha$   
42 regulate the transcription of *Bmal1* (*Arntl*), ensuring together with other transcriptional feedback  
43 loops a period of ca. 24 hours (Lowrey and Takahashi, 2011).

44 The sleep homeostatic process keeps track of time spent awake and time spent asleep, during  
45 which sleep pressure is increasing and decreasing, respectively. The mechanisms underlying this  
46 process are to date unknown. However, accumulating evidence implicates clock genes in sleep  
47 homeostasis [reviewed in (Franken, 2013)]. This is supported by studies in several species (*i.e.* mice,  
48 fruit flies and humans), showing that mutations in circadian clock genes are associated with an

49 altered sleep homeostatic response to sleep deprivation (SD) [e.g. (Mang et al., 2016, Shaw et al.,  
50 2002, Viola et al., 2007, Wisor et al., 2002)]. Furthermore, SD affects the expression of clock genes  
51 such as *Rev-erba*, *Per1-3* and *Dbp* (Mongrain et al., 2010), but the mechanisms through which this  
52 occurs are unclear.

53 In this study, we examined one such mechanism and hypothesized that some of the SD-induced  
54 changes in clock gene expression occur through Cold-Inducible RNA Binding Protein (CIRBP).  
55 Decreasing temperature *in vitro* increases CIRBP levels (Nishiyama et al., 1997) and the daily  
56 changes in body temperature of the mouse are sufficient to drive robust cyclic levels of *Cirbp* and  
57 CIRBP (Morf et al., 2012) in anti-phase with temperature. Although the daily changes in cortical  
58 temperature ( $T_{cx}$ ) appear circadian, more than 80% of its variance is explained by the sleep-wake  
59 distribution in the rat (Franken et al., 1992). Hence, the daily rhythms of cortical *Cirbp* become  
60 strongly attenuated when controlling for these sleep-wake driven changes in  $T_{cx}$  by SDs (see Figure  
61 1, based on Gene Expression Omnibus number GSE9442 from Maret et al., 2007). Furthermore,  
62 *Cirbp* is the top down-regulated gene after SD (Mongrain et al., 2010, Wang et al., 2010)  
63 underscoring again its sleep-wake dependent expression. But how does CIRBP relate to clock gene  
64 expression?

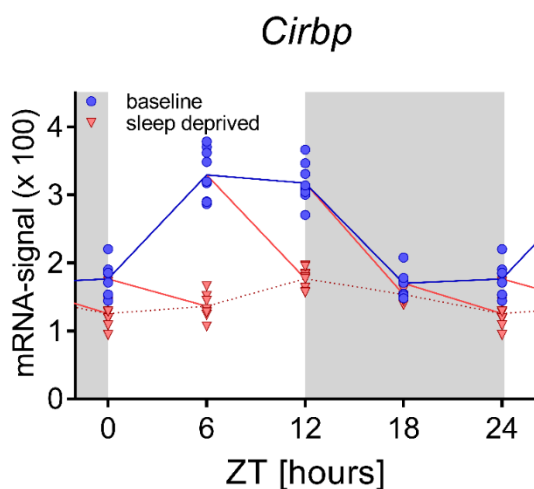

Figure 1 **The sleep-wake distribution drives daily changes of central *Cirbp* expression in the mouse.** After the onset of the baseline rest phase (ZT0), when mice spend more time asleep and thus  $T_{cx}$  decreases, *Cirbp* expression increases (blue symbols and lines), whereas between ZT12-18, when mice spent most of their time awake and  $T_{cx}$  is high, *Cirbp* decreases. When controlling for these diurnal changes in sleep-wake distribution by performing four 6h SD [sleep deprivation] starting at either ZT0, -6, -12, or -18, the diurnal amplitude of *Cirbp* is greatly reduced (red symbols represent levels of expression reached at the end of the SD). Nine biological replicates per time point and condition from three different inbred strains of mice were used (one data point missing at ZT18), and RNA was extracted from whole brain tissue (see Maret et al. 2007 for details). Data were taken from GEO GSE9442 and accessible in source file 1.

65  
66 Two independent studies showed that the temperature-driven changes in CIRBP are required  
67 for high amplitude clock gene expression in temperature synchronized cells (Morf et al., 2012, Liu  
68 et al., 2013). Therefore, we and others (Archer et al., 2014) hypothesized that changes in clock gene  
69 expression during SD are a consequence of the sleep-wake driven changes in CIRBP. We used mice

70 lacking CIRBP (*Cirbp* KO) (Masuda et al., 2012) to test this hypothesis. We first assessed whether  
71 also in the mouse the daily changes in  $T_{cx}$  are driven by the sleep-wake distribution and what the  
72 contribution of locomotor activity (LMA) to these changes was. Next, we assessed SD-induced  
73 changes in clock gene expression in WT and KO mice. Because we expected that the response to  
74 SD in terms of clock gene expression differed in KO mice, and clock genes partake in sleep  
75 homeostasis (Franken, 2013), we also assessed the homeostatic regulation of sleep in *Cirbp* KO and  
76 WT mice.

77 Our experiments revealed that also in the mouse the sleep-wake distribution is the major  
78 determinant of changes in  $T_{cx}$ , with a significant albeit small contribution of LMA. In line with our  
79 predictions, we found that lack of CIRBP indeed attenuated the SD-induced changes in the cortical  
80 expression of *Rev-erba* and the homeostatic response in REM sleep time. However, in contrast to  
81 our hypothesis, we observed that the changes in *Per2* and *Clock* expression after SD were  
82 augmented in *Cirbp* KO mice. Unexpectedly, we discovered that *Cirbp* KO mice were substantially  
83 more active compared to their WT littermates without increasing their time spent awake. This  
84 dark-phase increase in LMA was accompanied by an acceleration of EEG theta oscillations during  
85 active waking. Altogether, our data show that *Cirbp* contributes to some of the SD-induced changes  
86 in clock gene expression, but also points to the existence of other sleep-wake driven pathways  
87 conveying sleep-wake state to clock gene expression.

88

## 89        **Results**

90  
91        THE RELATION BETWEEN CORTICAL TEMPERATURE ( $T_{cx}$ ), SLEEP-WAKE DISTRIBUTION,  
92        AND LOCOMOTOR ACTIVITY (LMA)

93        The dependence of brain or cortical temperature on sleep-wake state has been demonstrated in  
94        a number of mammals (Alfoldi et al., 1990, Baker and Hayward, 1968, Deboer et al., 1994, Franken  
95        et al., 1992, Hayward and Baker, 1968) but has not been specifically addressed in the mouse.  
96        Moreover, no study so far specifically controlled for LMA when quantifying the contribution of  
97        sleep-wake state to brain temperature. We therefore measured cortical temperature ( $T_{cx}$ ), LMA and  
98        sleep-wake state in WT and *Cirbp* KO mice during two baseline days, a 6hr SD and the following  
99        two recovery days. Because the relationship between  $T_{cx}$ , LMA, and waking in WT and KO mice was  
100        alike, we illustrated the results in WT mice only.

101

102        *Fast changes in  $T_{cx}$  occur at sleep-wake state transitions*

103        A representative example of a 96h recording of LMA, sleep-wake state and  $T_{cx}$  is depicted in  
104        Figure 2. Consistent with mice being nocturnal animals, the mouse shows more waking and LMA,  
105        and overall higher  $T_{cx}$  levels during the dark phase. SD on the third recording day (between  
106        Zeitgeber Time (ZT)0-6) led to an almost uninterrupted period of 6hr waking, during which LMA  
107        and  $T_{cx}$  reached values comparable to bouts of spontaneous wakefulness under undisturbed  
108        baseline conditions (*i.e.*, ZT12-18). A closer inspection of the rapid changes in  $T_{cx}$  suggests that sleep-  
109        wake state transitions underlie these fluctuations. We further quantified these sleep-wake evoked  
110        changes in  $T_{cx}$  by selecting and aligning transitions between consolidated bouts of NREM and REM  
111        sleep and wakefulness during the two baseline days (Figure 2-B). When entering NREM sleep,  $T_{cx}$   
112        consistently decreased, whereas at a transition into wake and REM sleep,  $T_{cx}$  increased. The latter  
113        transition was characterized by a fast and consistent change in  $T_{cx}$ ; within 1.5 minutes,  $T_{cx}$  increased  
114        by 0.4°C. The subsequent transition from REM sleep into wake leads to an initial decrease in  $T_{cx}$   
115        and contrasts with the waking-evoked increase in  $T_{cx}$  when transitioning from NREM sleep to wake.  
116        Altogether, these results provide evidence that sleep-wake state importantly contributes to changes  
117        in  $T_{cx}$ . The sleep-wake state evoked changes in  $T_{cx}$  did not differ between genotypes (2-way RM  
118        ANOVA, factors genotype (GT) and Time; GT:  $p>0.13$ , GTxTime:  $p>0.09$ ).

119

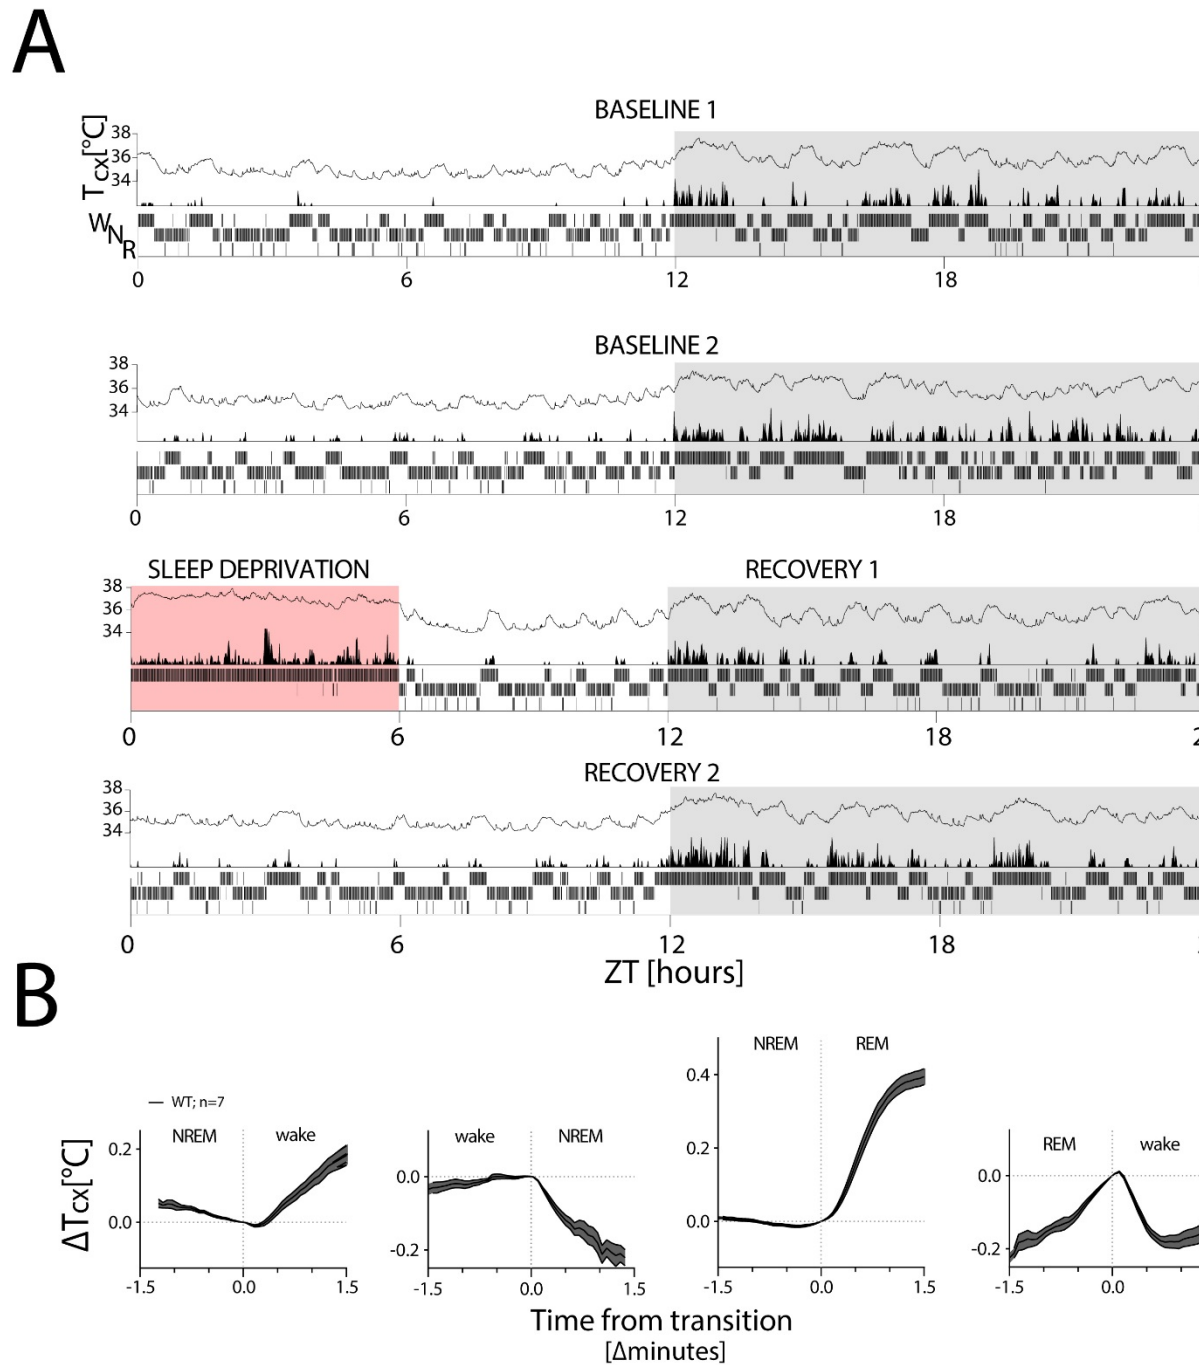

**Figure 2  $T_{cx}$  changes with sleep-wake state.**  $T_{cx}$ : cortical temperature; LMA: locomotor activity. **(A)** A representative four-day recording of one mouse in LD 12:12 (in white:grey) during two baseline days (top 2 panels), followed by a 6hr SD (in red; third panel) and two recovery days (bottom 2 panels), with within each panel  $T_{cx}$  (top; line graph), LMA (middle; area plot) and sleep-wake states (bottom; hypnogram). Sleep-wake states are averaged per minute to aid visualization. LMA was collected and plotted per minute (see Methods). **(B)** changes in  $T_{cx}$ , depicted as mean $\pm$ SEM, relative to  $T_{cx}$  at the sleep-wake transition (average of the last value before and first value after transition).  $T_{cx}$  increased when transitioning from NREM sleep to wake and to REM sleep (1-way RM ANOVA, factor Time,  $F(36,180)=40.8$ ,  $F(44,264)=222$ ;  $p<0.0001$ , respectively) and decreased when transitioning from wake to NREM sleep ( $F(22,132)=1.8$ ,  $p=0.02$ ). Also the transition from REM sleep to wake affected the time course of  $T_{cx}$  ( $F(23,138)=48.9$ ,  $p<0.0001$ ). Transition data were obtained from both baseline recordings (see Methods for details).

121 *Daily cycles in  $T_{cx}$  are determined by sleep-wake state*

122 After having established that the rapid changes in  $T_{cx}$  are indeed evoked by changes in sleep-  
123 wake state, we next wondered if the large daily change in  $T_{cx}$  is also due to the daily rhythms in  
124 sleep-wake state and LMA, and therefore inspected these variables per hour. The LMA data were  
125  $\log_2$  transformed to allow for parametric assessment.  $T_{cx}$ , waking and LMA oscillated over the course  
126 of the 24h baseline (BL) in similar fashion in both genotypes (2-way RM ANOVA on BL1 and -2  
127 averaged 1h intervals, Factor Time:  $F(23,207)=70.5; 27.2; 22.5; p<0.0001$ , respectively, Figure 3-A,  
128 Factor GT x Time (1,24);  $T_{cx}$ :  $F(23,207)=0.9, p=0.63$ ; waking: 1.7,  $p=0.03$ , LMA: 1.21,  $p=0.24$ ) and the  
129 amplitude of the BL change in  $T_{cx}$  did not differ between genotypes (WT:  $2.34\pm 0.1$ , KO:  $2.33\pm 0.1$ ; t-  
130 test:  $t(9)=-0.02, p=0.98$ ; average of the difference between the highest and lowest value hourly value  
131 in BL1 and -2). Importantly, the time course of waking and LMA both closely resembled that of  $T_{cx}$ .  
132 This observation was supported by the strong correlation between  $T_{cx}$  and waking (Figure 3-B left:  
133 WT:  $R^2=0.76$ ; KO:  $R^2=0.81, p<0.0001$ ) and between  $T_{cx}$  and LMA (Figure 3-B right: WT:  $R^2=0.60$ ; KO:  
134  $R^2=0.72, p<0.0001$ ).

135 To assess the influence of waking on  $T_{cx}$  at a time of day when  $T_{cx}$  is normally low and mice  
136 spend most of their time asleep, mice were sleep deprived between ZT0 and ZT6. Mice were 98%  
137 of the 6hr SD awake, and thus more awake and active compared to the same time under BL  
138 conditions (paired t-test: waking [hours] BL:  $2.2\pm 0.1$ , SD:  $5.9\pm 0.04$ ;  $t(10)=-38.1, p<0.0001$ ;  
139  $\log_2$ [movements], BL:  $13.1\pm 2.4$ , SD:  $39.4\pm 2.1$ ;  $t(10)=-15.2, p<0.0001$ ). These changes led to sustained  
140 elevated  $T_{cx}$  (average ZT0-ZT6 [ $^{\circ}$ C]: BL:  $34.7\pm 0.07$ , SD:  $36.6\pm 0.06, t(10)=-44.3, p<0.0001$ ), suggesting  
141 that wakefulness and/or LMA drives changes in  $T_{cx}$ . Genotype did not contribute to or interact with  
142 these changes (2-way ANOVA, GT\*SD/BL:  $p>0.39$ )

143 However, factors accompanying the SD other than extended waking, such as stress, could have  
144 contributed to the SD-induced changes in  $T_{cx}$ . To address this issue, we selected within each mouse  
145 the longest uninterrupted spontaneous waking bout occurring during BL (average bout length:  
146  $100\pm 19$  minutes). We then compared  $T_{cx}$  during the last 10 minutes of this spontaneous waking bout  
147 (to reduce any effects of differences in  $T_{cx}$  at bout-onset) with  $T_{cx}$  reached in the last 10 minutes of  
148 an equivalent time spent awake from the start of the SD on.  $T_{cx}$  reached during the SD and  
149 spontaneous wakefulness did not differ (Figure 3-C), also not in KO mice ( $t(5)=0.84, p=0.44$ ),  
150 indicating that factors other than extended wakefulness (e.g. light exposure, circadian time, SD-  
151 associated stress) do not importantly contribute to the changes in  $T_{cx}$  during the SD.

152

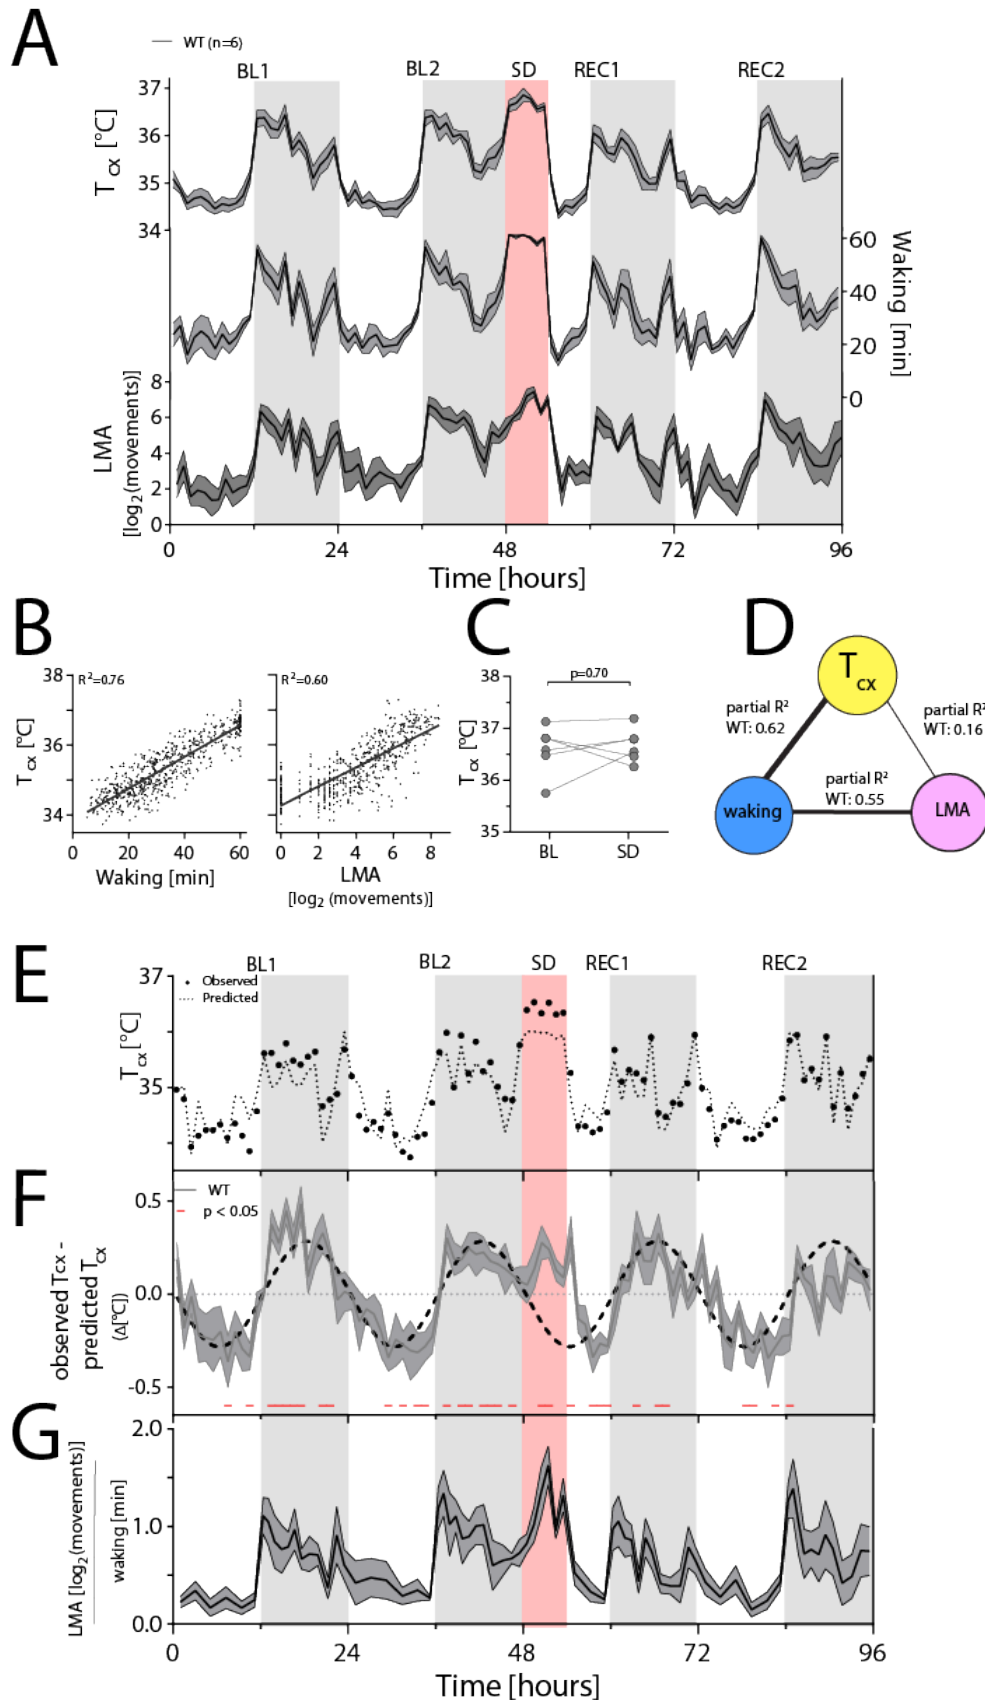

Figure 3: **Waking is the major determinant of  $T_{cx}$ .**

For panels A, F and G, the dark line represents the mean, areas span  $\pm 1$ SEM. BL: baseline, SD: sleep deprivation, REC: recovery,  $T_{cx}$ : cortical temperature, LMA: locomotor activity. **(A)** Time course of hourly values of  $T_{cx}$ , waking and LMA across the entire experiment. **(B)** Both waking (left) and LMA (right panel) correlate with  $T_{cx}$  (n=6; 96 values per mouse;  $R^2=0.76$  and 0.60, respectively,  $p < 0.0001$ ). **(C)**  $T_{cx}$  during SD did not differ from levels reached after long waking bouts during BL (t(5)=0.41,  $p=0.70$ ). **(D)** Waking after correcting for LMA is the major determinant of  $T_{cx}$ , as revealed by partial correlation analysis; here performed on the combined hourly values of all WT mice. **(E)** a representative example [mouse TC03], with measured  $T_{cx}$  (closed circles), and predicted  $T_{cx}$  (stippled line) [based on the correlation between  $T_{cx}$  and waking]. **(F)** During the dark phase and SD, the expected increase in  $T_{cx}$  (based on the amount of waking) is lower than the measured  $T_{cx}$ , resulting in positive residuals [residuals: observed  $T_{cx}$  - predicted  $T_{cx}$ ], whereas during the light phase, the expected  $T_{cx}$  is higher than the measured  $T_{cx}$ , resulting in negative residuals (t-test: data < 0,  $p < 0.05$ ). The sinewave was fitted to the residuals during BL1-2. **(G)** LMA per unit of waking follows a similar pattern as the residuals in figure F.



153 Considering the strong correlation between LMA and  $T_{cx}$  (WT:  $R^2=0.72$ ; KO:  $R^2=0.78$ ;  $p<0.0001$ ),  
154 it could be hypothesized that LMA explains partly the sleep-wake associated changes in  $T_{cx}$ . To  
155 investigate this further, the respective contribution of waking and LMA to changes in  $T_{cx}$  was  
156 quantified by a partial correlation analysis. Although LMA did significantly contribute,  
157 substantially more of the variance in  $T_{cx}$  was explained by waking in both genotypes (paired t-test  
158 on Fisher Z-transformed  $R^2$ -values from each individual mouse's partial correlation on hourly  
159 waking and  $T_{cx}$ , and on hourly LMA and  $T_{cx}$ : WT:  $t(5)=5.1$ ,  $p=0.004$ ; KO:  $t(5)=10.7$ ,  $p=0.0001$ ; see also  
160 Figure 3-D for  $R^2$ -partial correlation coefficients which are based on hourly data from all WT mice  
161 combined). We then determined the variance that could not be explained by the correlation  
162 between waking to  $T_{cx}$  (*i.e.* the residuals) by calculating the difference between the observed  $T_{cx}$  in  
163 a given hour and the predicted  $T_{cx}$  based on the time-spent-awake in that hour. The linear  
164 regression overestimated and underestimated  $T_{cx}$  during the light phase and dark phase,  
165 respectively (Figure 3-E,F; BL1 and BL2), leading to negative residuals during the light phase and  
166 positive residuals during the dark phase. Fitting a sinewave through the residuals of the two  
167 baseline days revealed a 'circadian' distribution, with a mean amplitude of  $0.29^\circ\text{C}$ , which is almost  
168 twice the amplitude as was previously reported on in the rat [ $0.15^\circ\text{C}$ ] (Franken et al., 1992).  
169 Interestingly, when considering the time course of the residuals throughout the experiment,  
170 including the SD and recovery, a consistent parallel with the distribution of LMA expressed per unit  
171 of waking became evident (Figure 3-G).

172 Therefore, to determine if including LMA in addition to waking, could predict a larger portion  
173 of the variance in  $T_{cx}$ , we applied three Mixed Linear Models, where LMA was considered by  
174 expressing LMA per unit of waking (LMA/Waking). Model1 explained the variance in  $T_{cx}$  based on  
175 waking alone, Model2 also incorporated LMA/Waking, and Model3 considered additionally the  
176 interaction between Waking and LMA/Waking. Indeed, Model3 predicted best the variance in  $T_{cx}$   
177 although in terms of explaining the variance in  $T_{cx}$ , the improvement is marginal over the two other  
178 models (Model1:  $R^2_c=0.84$ ; Model2:  $R^2_c=0.85$ ; Model3:  $R^2_c=0.86$ ; chi-squared test: Model1 vs Model2:  
179  $X^2(5)=16.2$ ;  $p<0.0001$ ; Model2 vs Model3:  $X^2(6)=25.0$ ;  $p<0.0001$ ). Thus, the sleep-wake distribution is  
180 the most important determinant of  $T_{cx}$  but LMA during waking is modestly contributing as well.  
181 Nevertheless, also the residuals of this model, depicted in Figure 3, supplement 1, still showed a  
182 similar pattern like the residuals in Figure 3-F, pointing towards the contribution of other  
183 (circadian) variables and/or a non-linearity of the association between the contribution of LMA and  
184 sleep-wake states to changes in  $T_{cx}$ .

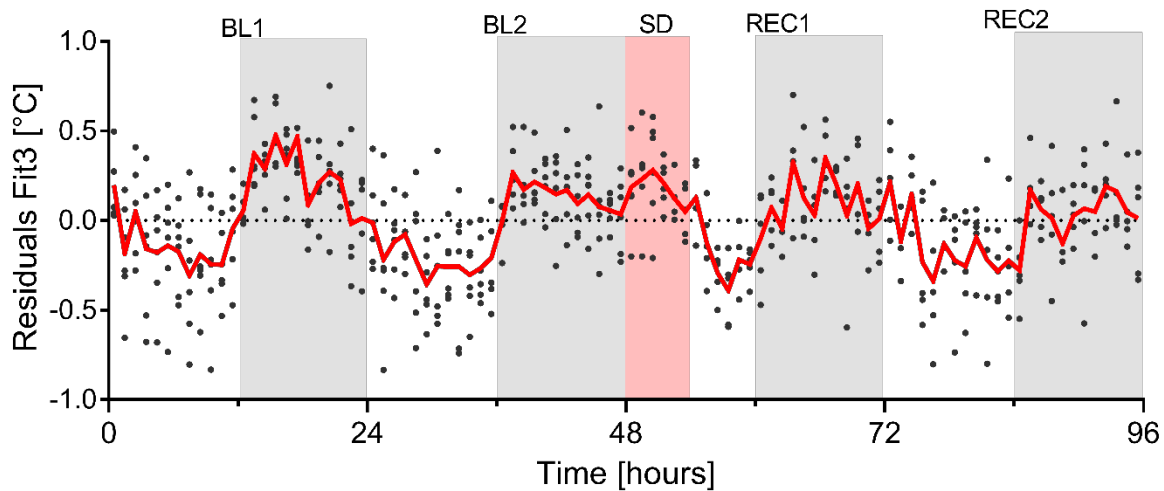

Figure 3, supplement 1 The residuals of the optimized mixed linear model (Model3; see Results section) still show a pattern alike the residuals in Figure 3-F. Red line depicts the mean value determined every hour, each dot represents an hourly residual value per mouse.

185

## 186 THE INFLUENCE OF SD AND CIRBP ON TRANSCRIPTS IN CORTEX AND LIVER

187 After establishing that also in the mouse the sleep-wake distribution is the major determinant  
188 of  $T_{cx}$ , we assessed whether the SD-incurred changes in CIRBP participate in linking the effect of  
189 SD to clock gene expression. To this end, we quantified 11 transcripts from liver and 15 from cortex  
190 before and after SD by RT-qPCR. Genes of interest included transcripts affected by SD (Maret et al.,  
191 2007, Mongrain et al., 2010) and/or by the presence of CIRBP (Liu et al., 2013, Morf et al., 2012), with  
192 an emphasis on clock genes. Mice were sacrificed before SD at ZTo, or 6 hours later after SD (ZT6-  
193 SD) together with non-sleep deprived control mice that could sleep *ad lib* (ZT6-NSD). Statistics on  
194 ZTo (t-test) and ZT6 (2-way ANOVA) can be found in Table 1.

195 From ZTo to ZT6 under undisturbed conditions,  $T_{cx}$  decreased because mice spend more time  
196 asleep compared to the previous hours in the dark phase (see also Figure 3-A). This decrease in  $T_{cx}$   
197 was accompanied by the expected increase of the expression of the cold-induced transcript *Cirbp*  
198 in WT mice (cortex:  $t(8)=3.2$ ,  $p=0.01$ ; liver:  $t(8)=2.7$ ,  $p=0.03$ ; Figure 4-A and Figure 4, supplement 1,  
199 compare also with the time course of *Cirbp* Figure 1). In contrast, SD during the same time span  
200 incurred a decrease in cortical and hepatic *Cirbp* relative to non-sleep deprived controls (cortex:  
201 Figure 4-A; liver: Figure 4, supplement 1), consistent with the wake-induced increase in  $T_{cx}$  during  
202 SD. No *Cirbp* mRNA was detected in KO mice.

203 RBM3 is another cold-inducible RNA Binding Protein and, like CIRBP, conveys temperature  
204 cycles into high-amplitude clock gene expression *in vitro* (Liu et al., 2013). A long and a short

205 isoform of *Rbm3* (*Rbm3-long* and *-short*, resp.) that differ in their 3'UTR length were discovered in  
 206 the mouse cortex. Although both isoforms are referred to as 'cold-induced', they exhibit opposite  
 207 responses to SD (Wang et al., 2010), with a decrease in the *short* isoform and an increase in the *long*  
 208 isoform. We found that overall, the short isoform was more common than the long isoform in the  
 209 cortex (PCR cycle detection number for all samples pooled: cortex: *Rbm3-short*:  $25.6 \pm 0.2$ , *Rbm3-*  
 210 *long*:  $29.7 \pm 0.1$ , amplification efficiency *Rbm3-short*: 2.11 and *Rbm3-long* 2.07). In the liver, only the

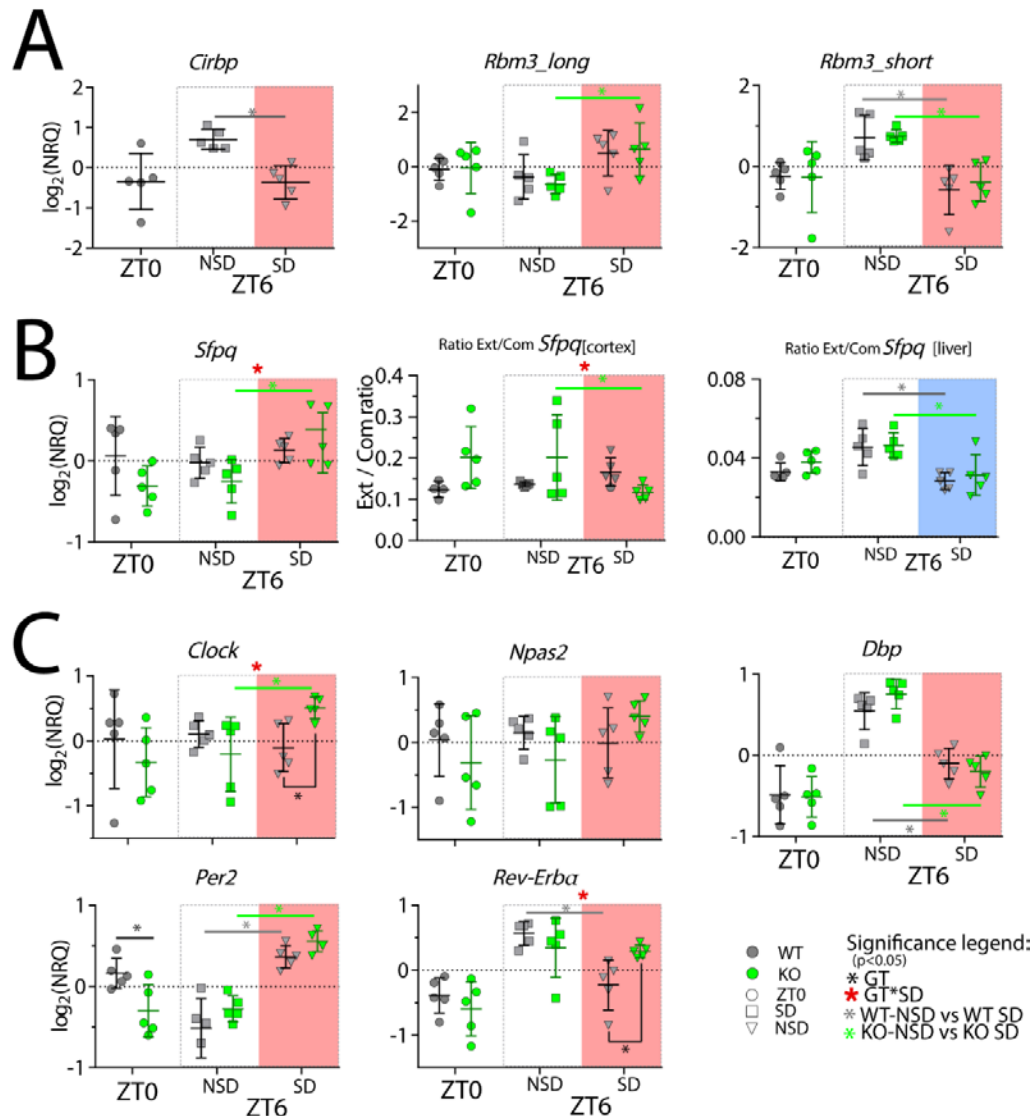

Figure 4 **Cortical expression of several genes is affected by SD and the lack of CIRBP.** NRQ: Normalized Relative Quantity, SD: sleep deprivation, GT: Genotype. n=5 for each group, each symbol represents an observation in one mouse. Mice were sacrificed at ZT0, at ZT6 after sleep deprivation (ZT6-SD) or after sleeping *ad lib* (ZT6-NSD). Statistics are performed separately for ZT0 (factor GT, t-test), and ZT6 (factor GT and SD; 2-W ANOVA). Significant (p<0.05) GT differences are indicated by a black line and \*, the effect of SD in WT mice with a grey line and \*, and in KO mice with a green line and \*. Interaction effects (GTxSD) at ZT6 are indicated by a red \*. See Table 1 for statistics.

211 short isoform was detected (liver: *Rbm3-short*:  $28.2 \pm 0.2$ , *Rbm3-long*:  $>32$ ; i.e., beyond reliable  
 212 detection limit). We confirmed that after SD, *Rbm3-short* was decreased in the cortex (Figure 4-A)  
 213 and liver (Figure 4, supplement 1), whereas *Rbm3-long* was increased in cortex. The latter  
 214 observation reached significance only in the KO mice (Figure 4-A).

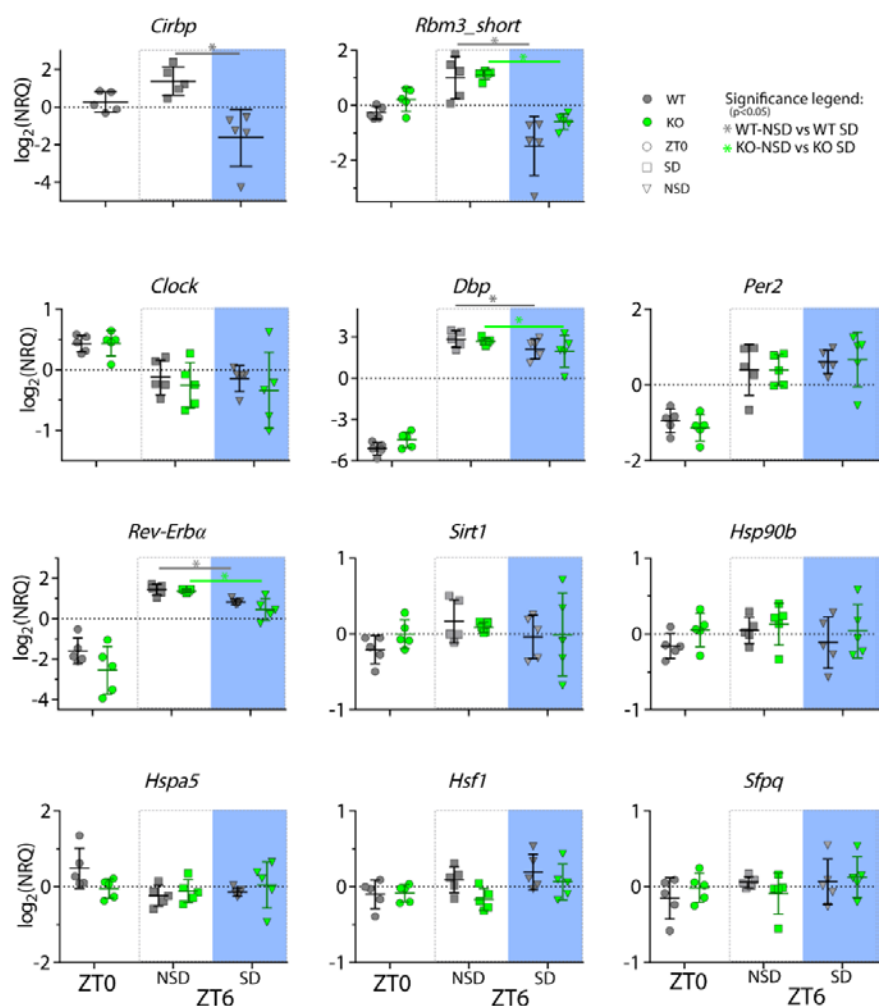

Figure 4, supplement 1 **Changes in transcripts incurred by the absence of CIRBP and/or SD in the liver.** Legend same as in Figure 4. See Table 1 for statistics.

215  
 216 As anticipated, cortical expression of the activity (and waking)-induced transcripts *Homer1a*,  
 217 *Dusp4*, *Hspa5*/BiP, *Hsp90b*, and *Hsf1* was increased by SD (Figure 4, supplement 2). Post-hoc tests  
 218 revealed that the latter two were significantly increased only in *Cirbp* KO mice. Furthermore, the  
 219 effect of SD on the transcripts *Hsp90b* and *Hspa5* was significantly amplified in *Cirbp* KO mice  
 220 compared to WT mice. Unexpectedly, no changes in the expression of heat shock transcripts  
 221 incurred by SD or genotype were detected in the liver (Figure 4, supplement 1).

222 *In vitro* studies have shown that the presence of CIRBP is associated with longer 3'UTRs of its  
223 target genes, such as the transcript splice-factor proline Q (*Sfpq*), resulting in a higher prevalence  
224 of long isoforms (extended or *ext*) over all isoforms (common or *com*), and thus an increased  
225 *ext/com* ratio [see FigS4-S5 in (Liu et al., 2013)]. We therefore expected a lower *ext/com* ratio in  
226 mice lacking CIRBP. However, under baseline conditions [ZTo and ZT6-NSD], *Cirbp* KO mice did  
227 not differ in their *ext/com* ratio from WT littermates (ZTo: liver:  $t(8)=1.55$ ,  $p=0.16$ ; cortex:  $t(7)=2.0$ ,  
228  $p=0.09$ ; ZT6-NSD: liver:  $t(8)=0.19$ ,  $p=0.85$ , cortex:  $t(8)=1.4$ ,  $p=0.20$ ). Because also RBM3 partakes in  
229 determining the *ext/com* ratio (Liu et al., 2013), the lack of an effect of CIRBP on the *ext/com* ratio  
230 could be due to compensation by RBM3. We could test this by assessing the effect of SD on the  
231 *ext/com* ratio, because SD acutely suppresses both RBM3 and CIRBP. Indeed, SD significantly  
232 decreased the *ext/com* ratio in the liver in both genotypes (Figure 4-B; 2-way ANOVA, factor SD:  
233  $F(1,16)=20.4$ ,  $p=0.003$ ). In the cortex, however, we observed an unexpected non-significant increase  
234 in WT mice and a significant decrease in KO mice, leading to a significant GT x SD interaction  
235 (cortex:  $F(1,16)=5.25$ ,  $p=0.036$ ). Therefore, our data are inconclusive in confirming a role for CIRBP,  
236 and possibly RBM3, in the *in vivo* determination of *Sfpq*'s *ext/com* ratio.

237 Our main question concerned the contribution of CIRBP to sleep-wake induced changes in  
238 clock gene expression. Previous studies evaluating the effects of SD on cortical clock transcripts  
239 showed a consistent increase in *Per2* and a decrease in *Dbp* and *Rev-erba*, whereas the response of  
240 *Clock* and *Npas2* varied among studies, but if any, tended to increase after SD (reviewed in (Mang  
241 and Franken, 2015)). Indeed, in the cortex of WT mice, SD increased cortical *Per2*, decreased *Dbp*  
242 and *Rev-erba* and did not significantly affect *Clock* and *Npas2* (Figure 4-C). In accordance with our  
243 hypothesis, CIRBP attenuated the SD induced changes of cortical *Rev-erba*, a transcriptional  
244 repressor recently implicated in the sleep homeostat (Mang et al., 2016). This observation contrasts  
245 with the genotype-dependent changes in *Per2*, because when considering the lower levels of cortical  
246 *Per2* in *Cirbp* KO mice at ZTo, the effect of SD was amplified (Figure 4-C, 2-way ANOVA, ZTo-  
247 ZT6[SD], interaction effect GT x SD:  $F(1,16)=12.4$ ,  $p=0.003$ ). Also, the expression of *Clock* in the  
248 cortex was significantly increased by SD in *Cirbp* KO mice and not in WT littermates.

249 Compared to the cortex, the clock gene expression in the liver appeared more resilient to the  
250 effects of SD, as only *Dbp* and *Rev-erba* were significantly affected and not *Per2* (Figure 4,  
251 supplement 1). The lack of CIRBP did not interfere with this response, nor did it contribute to  
252 genotype dependent changes of other (clock) gene transcripts in the liver.

253 Taken together, the absence of CIRBP modulated the SD induced changes in the cortical  
254 expression of the clock genes *Rev-erba*, *Clock* and *Per2*. Furthermore, the expression of transcripts  
255 in the heat shock pathway were also affected in a genotypic manner by SD.  
256  
257

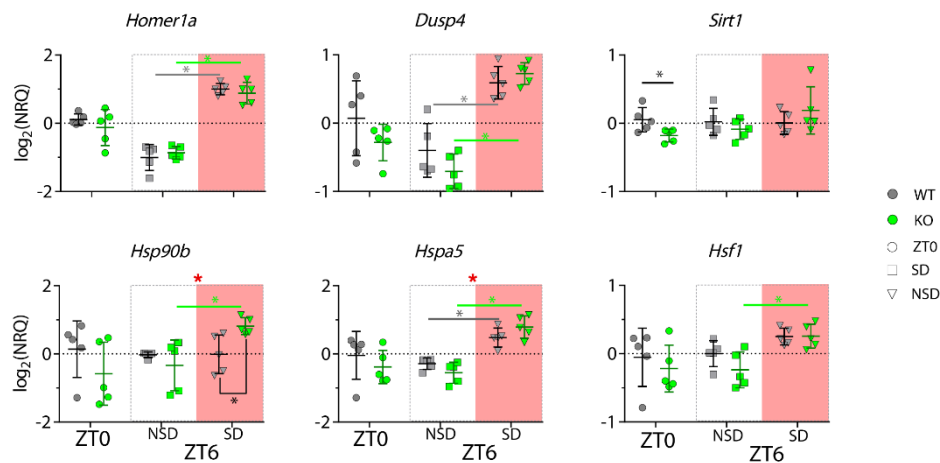

Figure 4, supplement 2 **Changes in transcripts incurred by the absence of CIRBP and/or SD in the cortex.** Legend same as in Figure 4. See Table 1 for statistics.

258 Table 1: statistics on RT-qPCR results

| Transcript        | Cortex            |                      |                     |                   | Liver             |                      |                   |                     |
|-------------------|-------------------|----------------------|---------------------|-------------------|-------------------|----------------------|-------------------|---------------------|
|                   | ZT0 (#)           | ZT6                  |                     | Interaction (*)   | ZT0 (#)           | ZT6                  |                   | Interaction (*)     |
|                   |                   | SD/NSD(*)            | GT (*)              |                   |                   | SD/NSD (*)           | GT (*)            |                     |
| <i>Cirbp</i>      | X                 | t(8)=4.9;<br>p=0.001 | X                   | X                 | X                 | t(8)=4.0,<br>p=0.004 | X                 | X                   |
| <i>Clock</i>      | t=0.86;<br>p=0.21 | F=2.38;<br>p=0.14    | F=0.85;<br>p=0.37   | F=8.02;<br>p=0.01 | t=0.03;<br>p=0.98 | F=0.09;<br>p=0.77    | F=0.81;<br>p=0.38 | F=0.03;<br>p=0.87   |
| <i>Dbp</i>        | t=0.13;<br>p=0.90 | F=82.0;<br>p<0.0001  | F=0.39;<br>p=0.54   | F=3.06;<br>p=0.10 | t=1.99;<br>p=0.08 | F=4.37;<br>p=0.05    | F=0.23;<br>p=0.64 | F=0.0002;<br>p=0.99 |
| <i>Dusp4</i>      | t=1.29;<br>p=0.23 | F=97.55;<br>p<0.0001 | F=0.50;<br>p=0.49   | F=3.24;<br>p=0.09 | X                 | X                    | X                 | X                   |
| <i>Homer1a</i>    | t=0.96;<br>p=0.36 | F=228.8;<br>p<0.0001 | F=0.005;<br>p=0.94  | F=1.08;<br>p=0.31 | X                 | X                    | X                 | X                   |
| <i>Hsf1</i>       | t=0.67;<br>p=0.52 | F=18.22;<br>p=0.0006 | F=1.79;<br>p=0.20   | F=1.9;<br>p=0.18  | t=0.14;<br>p=0.89 | F=3.43;<br>p=0.08    | F=4.63;<br>p=0.05 | F=0.48;<br>p=0.50   |
| <i>Hsp90b</i>     | t=1.29;<br>p=0.23 | F=7.18;<br>p=0.0164  | F=1.40;<br>p=0.25   | F=6.86;<br>p=0.02 | t=1.71;<br>p=0.12 | F=0.93;<br>p=0.35    | F=0.80;<br>p=0.38 | F=0.07;<br>p=0.80   |
| <i>Hspa5</i>      | t=0.89;<br>p=0.40 | F=72.03;<br>p<0.0001 | F=0.03;<br>p=0.86   | F=5.32;<br>p=0.03 | t=2.02;<br>p=0.08 | F=0.62;<br>p=0.44    | F=0.84;<br>p=0.37 | F=0.04;<br>p=0.86   |
| <i>Npas2</i>      | t=0.86;<br>p=0.41 | F=1.56;<br>p=0.2298  | F=0.0008;<br>p=0.98 | F=3.99;<br>p=0.06 | X                 | X                    | X                 | X                   |
| <i>Per2</i>       | t=2.78;<br>p=0.02 | F=75.22;<br>p<0.0001 | F=4.78;<br>p=0.04   | F=0.06;<br>p=0.80 | t=0.90;<br>p=0.40 | F=0.95;<br>p=0.34    | F=0.01;<br>p=0.92 | F=0.02;<br>p=0.90   |
| <i>Rbm3-short</i> | t=0.05;<br>p=0.96 | F=32.04;<br>p<0.001  | F=0.31;<br>p=0.59   | F=0.13;<br>p=0.73 | t=2.23;<br>p=0.06 | F=47.6;<br>p<0.0001  | F=2.7;<br>p=0.12  | F=1.6;<br>p=0.22    |
| <i>Rbm3-long</i>  | t=0.10;<br>p=0.92 | F=9.49;<br>p=0.007   | F=0.03;<br>p=0.86   | F=0.32;<br>p=0.58 | X                 | X                    | X                 | X                   |
| <i>Rev-erba</i>   | t=0.91;<br>p=0.39 | F=8.95;<br>p=0.009   | F=1.09;<br>p=0.31   | F=6.80;<br>p=0.02 | t=1.59;<br>p=0.15 | F=31.13;<br>p<0.0001 | F=2.41;<br>p=0.14 | F=1.37;<br>p=0.26   |
| <i>Sfpq</i>       | t=1.51;<br>p=0.17 | F=11.61;<br>p=0.004  | F=0.017;<br>p=0.90  | F=4.44;<br>p=0.05 | t=0.93;<br>p=0.38 | F=1.26;<br>p=0.28    | F=2.78;<br>p=0.11 | F<0.001;<br>p=0.98  |
| <i>Sirt1</i>      | t=2.56;<br>p=0.04 | F=1.61;<br>p=0.22    | F=0.14;<br>p=0.72   | F=2.07;<br>p=0.17 | t=1.75;<br>p=0.12 | F=0.94;<br>p=0.35    | F=0.03;<br>p=0.87 | F=0.12;<br>p=0.73   |

259  
260  
261  
262  
263  
264  
265  
266  
267  
268  
269  
270  
271  
272

GT: genotype, SD/NSD: Sleep deprived / non-sleep deprived (control)

ZT0: t-test, degrees of freedom: 8

ZT6: two-way ANOVA (factors SD and GT), df=1 for both factors SD, GT and its interaction; error df=16

X: Ct>30 or undetected

Green: significant decrease (at ZT0: KO relative to WT; at ZT6, SD/NSD: SD relative to NSD; GT: KO relative to WT)

Red: significant increase (at ZT0: KO relative to WT; at ZT6, SD/NSD: SD relative to NSD; GT: KO relative to WT)

Purple: significant interaction

Significance level:  $\alpha=0.05$

273 CIRBP CONTRIBUTES TO SLEEP HOMEOSTASIS

274 Because *Cirbp* KO mice showed a modulated response to SD in three out of the five cortical  
 275 clock gene transcripts we quantified, and clock genes importantly partake in the sleep homeostatic  
 276 process (reviewed in (Franken, 2013)), we hypothesized that *Cirbp* KO mice have a blunted sleep-  
 277 homeostatic process. We quantified EEG power in the delta band [0.75 – 4.0 Hz] during NREM  
 278 sleep, which is a proxy of NREM sleep pressure and reflects a homeostatically regulated sleep  
 279 process, Process S (Daan et al., 1984). As additional sleep homeostatic measures, we calculated the  
 280 amount of NREM and REM sleep recovered after SD relative to baseline sleep.

281  
 282 *Baseline characteristics of sleep-wake behavior do not differ between Cirbp KO and WT mice*

283 During the two baseline days, no significant differences in waking, NREM or REM sleep were  
 284 observed. This was neither the case for time spent in these three behavioral states per light and  
 285 dark phase (Table 2), nor for the distribution of sleep and waking across the day (see Figure 5-A  
 286 and Figure 6-A). Noteworthy is that under constant darkness we did not detect a change in  
 287 circadian period length (period (hours): WT (n=5): 23.8±0.03 and KO (n=7): 23.8±0.01).

|              | WT     |        | KO     |          | Statistics<br>(2-way ANOVA)  |
|--------------|--------|--------|--------|----------|------------------------------|
|              | Light  | Dark   | Light  | Dark     | Factor GT x Light, Df : 1,35 |
| NREM sleep   | 389±4  | 189±10 | 376±4  | 170±13   | F=0.02, p=0.89               |
| REM sleep    | 70±2   | 19±2   | 66±2   | 20±2     | F=0.83, p=0.37               |
| Total waking | 260±4  | 512±11 | 277±5  | 530±14   | F=0.02, p=0.90               |
| TDW          | 45±3   | 179±12 | 55±5   | 192±15   | F=0.13, p=0.72               |
| LMA          | 119±16 | 817±70 | 181±26 | 1370±142 | F=7.1, p=0.01                |

Table 2. Baseline time spent in sleep-wake states (min) and LMA (movements) per 12 hours per genotype, averages of BL1-2. 2-way ANOVA (Factor GT and Light/Dark) on those same 12-hour values. Degrees of freedom for both GT and Light/Dark: Df=1; error term: Df=35.

288  
 289 *Sleep homeostatic processes under baseline and recovery*

290 The time course of delta power in the two genotypes was overall similar. In the dark phase, when  
 291 mice spent most of their time awake and thus sleep pressure accumulates, delta power during  
 292 NREM sleep was highest. This contrasts with the end of the light phase [ZT8-12], where NREM sleep  
 293 delta power reached its lowest levels of the day due to the high and sustained prevalence of NREM  
 294 sleep in the preceding hours. Despite the overall similarities in daily changes of NREM delta power,  
 295 subtle differences were observed: delta power levels were higher during the dark phase in *Cirbp* KO  
 296 compared to WT mice, and these differences reached significance during the dark periods of  
 297 recovery (Figure 5-A, 2<sup>nd</sup> graph from top).



298 Differences in delta power can be attributed to changes in the dynamics of the underlying  
 299 homeostatic process, Process S, and/or to changes in the sleep-wake distribution. Evidence  
 300 supporting the latter possibility was observed because *Cirbp* KO mice tended to spend less time in  
 301 NREM sleep (and more time awake) during the early dark phase compared to WT mice, reaching  
 302 significance during the recovery (Figure 5-A; 3<sup>rd</sup> graph from top). To test if these changes in the  
 303 sleep-wake distribution were indeed sufficient to raise NREM delta power above WT levels, we  
 304 estimated the increase ( $\tau_i$ ) and decrease ( $\tau_d$ ) rate of delta power by a simulation of Process S based  
 305 on the sleep-wake distribution. We assumed Process S to increase exponentially during waking and  
 306 REM sleep by time constant  $\tau_i$  and to decrease during NREM sleep by time constant  $\tau_d$  (see Materials

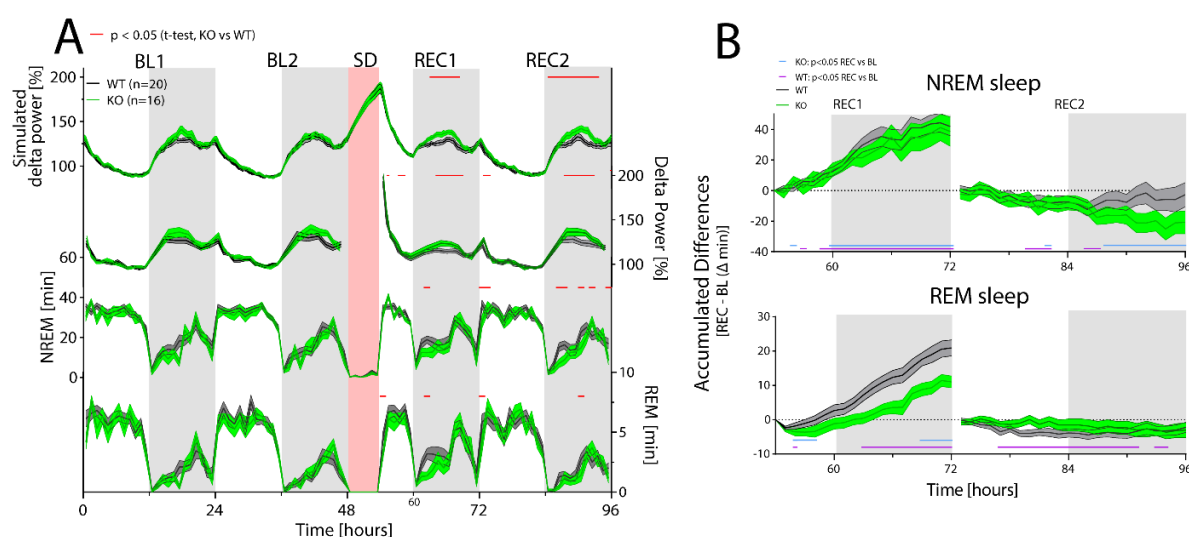

Figure 5 **CIRBP modulates the sleep-wake distribution and REM sleep recovery after sleep deprivation.** *Cirbp* KO (green lines and areas) and WT (black line, grey areas) mice during the two baseline days (BL1 and -2), sleep deprivation (SD), and the two recovery days (REC1 and -2; areas span  $\pm 1$ SEM range). **(A)** From top to bottom: Simulated delta power (Process S), measured NREM delta power, NREM sleep and REM sleep. During BL, trends, but no significant effect of GT or its interaction with time were detected in the simulation of process S, delta power, NREM sleep or REM sleep. During REC, the simulation predicts increased delta power in *Cirbp* KO mice (GT:  $F(1,34)=5.56$ ,  $p=0.024$ ), based on differences in NREM sleep distribution (GT:  $F(1,34)=6.02$ ,  $p=0.0194$ ) which are also reflected by increased delta power during the dark phase (GT:  $F(1,34)=4.65$ ,  $p=0.038$ ). GT effects in REM sleep were also detected during recovery (factor GT:  $F(1,34)=5.45$ ,  $p=0.026$ ). Exact timing of GT differences is indicated by superimposed red lines (post-hoc t-test,  $p<0.05$ ). **(B)** Top: KO mice recover as much NREM sleep as WT mice in the first 18hrs after SD (REC1 at 72Hr: WT:  $41.9\pm 6.1$  KO:  $38.6\pm 9.7$  min; t-test:  $t(34)=0.30$ ,  $p=0.76$ ). Bottom: KO mice accumulated less REM sleep during the first recovery day over the baseline day in comparison to WT mice relative to baseline (REC1 at 72Hr, WT:  $20.9\pm 2.3$  KO:  $9.9\pm 2.0$ , t-test:  $t(34)=3.7$ ,  $p=0.0007$ ).

307 and Methods, and (Franken et al., 2001) for more details). This simulation not only captured  
 308 well the overall dynamics (mean square of the measured-predicted differences, mean $\pm$ SEM: WT:  
 309  $10.1\pm 0.3$ , KO:  $10.4\pm 0.4$ ) but also the genotype differences in delta power (Figure 5-A; top graph). No  
 310 differences in the time constants of Process S were detected (see Table 3). Hence, the reduction in  
 311 NREM sleep in *Cirbp* KO mice in the beginning of the dark period caused the higher NREM EEG  
 312

313 delta power values in subsequent hours, underscoring the notion that small differences in NREM  
 314 sleep time can have large repercussions on delta power when waking prevails and thus Process S  
 315 increases (Franken et al., 2001).

|              | WT          | KO          | t-test, df=34   |
|--------------|-------------|-------------|-----------------|
| $S_0$ [%]    | 128.2 ± 2.4 | 132.1 ± 2.6 | t=1.10, p=0.29  |
| $\tau_i$ [h] | 13.2 ± 1.2  | 12.9 ± 1.0  | t=-0.16, p=0.87 |
| $\tau_d$ [h] | 3.0 ± 0.2   | 2.8 ± 0.2   | t=-0.74, p=0.46 |
| LA [%]       | 45.1 ± 1.4  | 45.1 ± 1.1  | t=-0.02, p=0.98 |
| UA [%]       | 288.8 ± 3.0 | 296.6 ± 3.2 | t=1.80, p=0.09  |

Table 3 **Time constants, asymptotes and  $S_0$  for Process S do not differ between *Cirbp* WT and KO mice.** Mean time constants ( $\pm$ SEM) obtained by the simulation (Process S) with the best fit to the NREM delta power values, where the increase of Process S is simulated by  $\tau_i$ , the decrease by  $\tau_d$  and the upper- and lower asymptotes by UA and LA, respectively. No significant genotype differences were observed. See material and methods for detailed description of the simulation.

316 A different aspect of NREM sleep homeostasis concerns the regulation of time spent in this state.  
 317 This can be quantified by accumulating relative differences in time spent in NREM sleep from  
 318 corresponding baseline hours over the recovery period. At the end of the first recovery day, both  
 319 KO and WT mice had gained ca. 40 minutes of NREM sleep relative to baseline (Figure 5-B, upper  
 320 panel).

321 The amount of REM sleep is also homeostatically defended (Franken, 2002). At the end of REC<sub>1</sub>,  
 322 both WT and KO mice spent more time in REM sleep compared to corresponding baseline hours.  
 323 However, this increase in REM sleep was significantly attenuated by 46% in *Cirbp* KO mice (Figure  
 324 5-B, lower panel). Because no significant differences were detected during baseline in time spent in  
 325 REM sleep (see also Table 1), this attenuated rebound in REM sleep resulted from less REM sleep  
 326 during recovery, specifically in the first hours of the dark phase when the genotypic differences  
 327 were most prominent (Figure 5-A, lowest graph).

328 Thus, although CIRBP did not affect the processes underlying NREM sleep intensity and NREM  
 329 sleep time, it did contribute to REM sleep homeostasis by increasing the amount of REM sleep after  
 330 SD.

331

### 332 AN UNANTICIPATED WAKING PHENOTYPE IN CIRBP KO MICE

333 While quantifying sleep-wake states, we observed that *Cirbp* KO mice were more active than  
 334 their WT littermates during the dark phase ( $t_{(31)}=-2.56$ ,  $p=0.015$ , see also Table 2). More specifically,  
 335 *Cirbp* KO mice were almost twice as active in the first 6hrs of the dark phase (movements: WT:

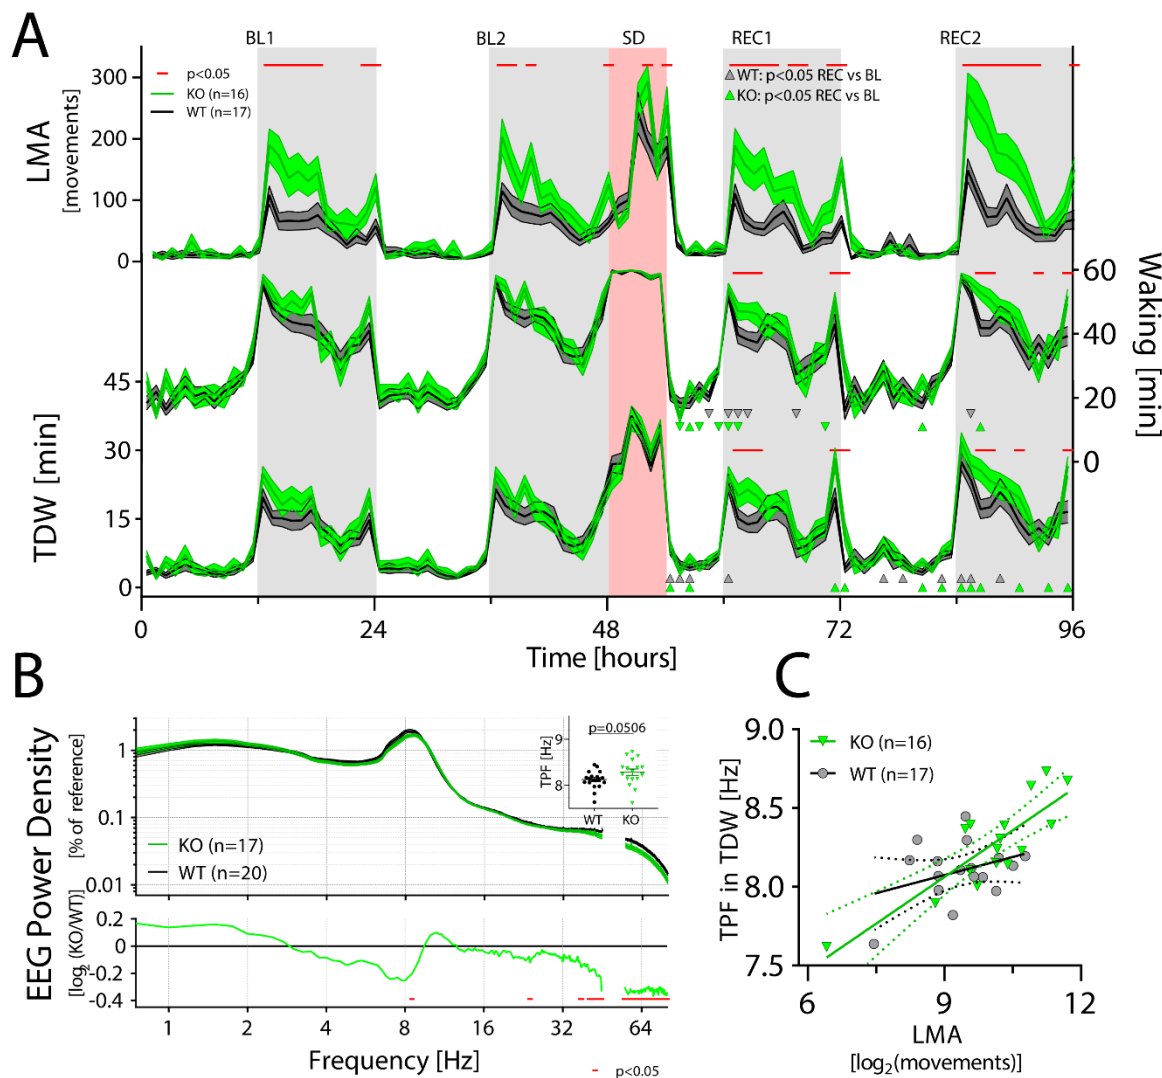

Figure 6 **CIRBP suppresses LMA and affects spectral composition during TDW.** LMA: locomotor activity, TDW: theta dominated waking; TPF: theta peak frequency. (A) *Cirbp* KO (green lines and areas) and WT (black line, grey areas) mice during the two baseline days (BL1 and -2), sleep deprivation (SD), and the two recovery days (REC1 and -2; areas span  $\pm 1$ SEM range). (A) *Cirbp* KO mice are more active in the dark periods only (BL: GTxTime: F (47, 1457) = 3.5, P<0.0001; REC: GTxTime: F (41, 1271) = 5.2, P<0.001), and spent more time awake and in theta dominated waking (TDW) during REC compared to WT mice (total waking: BL: GTxTime: F(47,1457)=1.1, P=0.33 REC: GTxTime: F (41, 1271) = 1.9, P=0.0005; TDW: BL: GTxTime: F (47, 1457) = 1.1, P=0.35; REC: GTxTime: F (41, 1271) = 1.8, P=0.0025). Significant genotype differences are marked superimposed red lines (post-hoc t-tests; p<0.05).  $\Delta$  and  $\nabla$  indicate a significant increase and decrease in REC compared to same time in BL, respectively. (B) CIRBP contributes to the spectral composition of TDW in the dark phase (2-way RM ANOVA; GTxFreq: F(278,9730)=2.0; p<0.0001, red symbols in lower panel: post-hoc t-tests, p<0.05), and KO mice tend to have faster TPF during TDW in the dark phase (t(35)=2.0; p=0.0506). (C) TPF in the dark phase correlates only in the KO mice significantly with LMA (WT: R<sup>2</sup>=0.12, p=0.17, KO: R<sup>2</sup>=0.71, p<0.0001).

336

337 463.8 $\pm$ 60.7, KO: 801.8 $\pm$ 118.4, t(35)=-2.7, p=0.012; Figure 6-A). Interestingly, this pronounced  
 338 increase was not associated with a significant increase in time spent awake during BL (per 12 hrs:  
 339 t(35)=1.2, p=0.24, and see Table 2), and indeed *Cirbp* KO mice were more active per unit of waking  
 340 (average in the dark phase, LMA [movements/waking(min)], WT: 1.3 $\pm$ 0.13, KO: 2.1 $\pm$ 0.28; t(35)=-2.7,

341  $p=0.01$ ). Note that also  $T_{cx}$  was not significantly increased in *Cirbp* KO mice during the dark phase  
 342 ( $T_{cx}$ : WT:  $35.9 \pm 0.1$ , KO:  $36.1 \pm 0.1$ , t-test,  $t(10)=1.3$ ,  $p=0.24$ ) despite the increased LMA at this time of  
 343 the day, again underscoring the minimal contribution of LMA to  $T_{cx}$ .

344 Because *Cirbp* KO mice are not more awake (Table 2 and Figure 6), we wondered if their  
 345 increased LMA is associated to the prevalence of sub-states of waking. Theta-dominated waking  
 346 (TDW) is a sub-state of waking that correlates with activity, prevails during the dark phase and SD,  
 347 and is characterized by the presence of EEG theta-activity (Buzsáki, 2006, Vassalli and Franken,  
 348 2017). Despite their increased LMA, *Cirbp* KO mice did not spend more time in TDW during the  
 349 dark phase of the BL (see Table 1,  $t(31)=-1.22$ ,  $p=0.23$ ). If not time spent in TDW, does the increased  
 350 LMA in *Cirbp* KO mice relate to changes in brain activity during dark phase TDW?

351 Although in both genotypes the TDW EEG showed the characteristic theta activity [6.5-12.0  
 352 Hz], subtle differences between genotypes were detected in the spectral composition of the EEG  
 353 signal. Slow [32-45Hz] and fast [55-80Hz] gamma power were both reduced during TDW in *Cirbp*  
 354 KO mice (Figure 6-B), and this reduction was observed throughout the experiment (Figure 6,

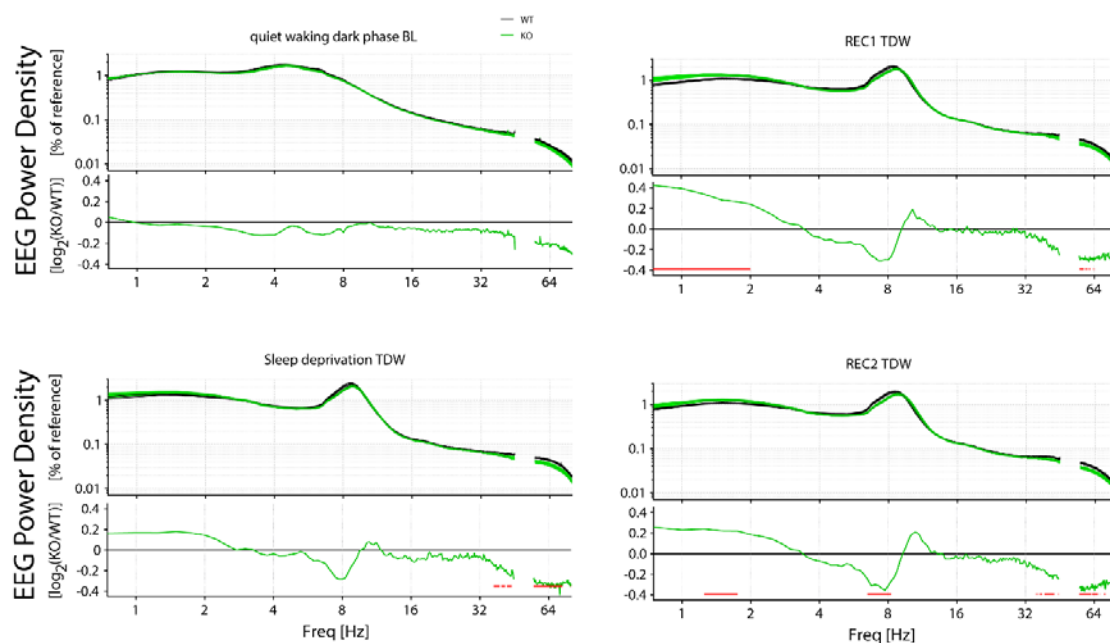

Figure 6, supplement 1 **Changes in the EEG spectra are observed in TDW, but not in quiet waking.** Spectral composition of *Cirbp* KO (green lines and areas;  $n=17$ ) and WT (black line, grey areas;  $n=20$ ) mice at different times of the experiment (indicated by the title, BL: baseline, REC1: recovery1, REC2: recovery2). In each graph, the top panel depicts the spectral composition whereas in the lower panel, the KO spectral composition relative to the WT is shown (ratio KO/WT). Red symbols in lower panel indicate significant difference for the frequency bins (post-hoc t-test,  $p < 0.05$ ). **‘Quiet’ waking baseline dark phase:** No effect of GT or an interaction effect (2-way RM ANOVA,  $GT * Freq$ :  $F(278, 9730)=0.81$ ,  $P=0.99$ ) on the spectral composition of quiet waking in the dark phase of the baseline. **Sleep deprivation TDW:** significant interaction between GT and Freq ( $F(278, 9730) = 1.722$ ,  $P < 0.0001$ ). **REC1 TDW:** significant interaction:  $F(278, 9730) = 2.984$ ,  $P < 0.0001$ ; **REC2 TDW:** significant interaction  $F(278, 9730)=3.083$ ,  $P < 0.0001$ ).

355 supplement 1; and see time course in Figure 6, supplement 2), indicating that these spectral  
356 genotype differences are robust across different light conditions, circadian times and throughout  
357 the SD.

358 In contrast, the spectral composition of the EEG during ‘quiet’ waking (*i.e.* all waking that is not  
359 TDW) was remarkable similar between the two genotypes (Figure 6, figure supplement 1),  
360 demonstrating that the changes in spectral composition of TDW EEG are not the result of a general  
361 effect of CIRBP on the waking EEG.

362 Moreover, we observed a decrease in slow and a non-significant increase in faster theta  
363 activity in the TDW EEG of *Cirbp* KO mice, together hinting at an acceleration of theta peak  
364 frequency (TPF; lower panel in Figure 6-B). TPF during TDW in BL was indeed increased in KO  
365 mice (+0.15Hz) although our significance threshold was not met ( $t_{(35)}=2.0$ ,  $p=0.0506$ ). No  
366 suggestions for accelerated TPF in REM sleep during BL, the other sleep-wake state characterized  
367 by distinct theta oscillations in the EEG, were detected (WT:  $7.43\pm 0.06$ ; KO:  $7.56\pm 0.05$ ,  $t_{(35)}=1.7$ ,  
368  $p=0.10$ ). During locomotion, increased LMA correlates well with increased TPF (Jeewajee et al.,  
369 2008). In accordance with this observation, mean  $\log_2$ -transformed LMA levels per mouse during  
370 the dark phase predicted well the mean TPF observed during TDW at the same time of day (WT  
371 and KO combined;  $R^2=0.52$ ,  $p<0.0001$ ), although this relationship remained significant only in KO  
372 mice when assessing the two genotypes separately (Figure 6-C). This genotype-dependent  
373 association between TPF and LMA was not confirmed by a significant difference in slope between  
374 the genotypes (ANCOVA,  $F_{(1,29)}=3.8$ ,  $p=0.059$ ).

375 Because the group correlation did not account for inter-individual differences in LMA levels, we  
376 also assessed the correlations between TPF and LMA within individual mice. Moreover, to test if  
377 this association depended on the lighting condition, we analyzed this during the dark and light  
378 phase separately (*i.e.* 24 values per mouse per lighting condition; see also Table 4). In the dark  
379 phases, this correlation was significant in all but one mouse (a KO), and both the slope and the  
380 predictive power of this correlation did not significantly differ between genotypes (slope: WT:  
381  $0.15\pm 0.01$ , KO:  $0.14\pm 0.01$ ,  $t_{(31)}=0.37$ ,  $p=0.72$ ;  $R^2$ : WT:  $0.81\pm 0.03$ ; KO:  $0.79\pm 0.04$ , t-test on the Fisher Z-  
382 transformed  $R^2$ -values:  $t_{(31)}=-0.49$ ,  $p=0.62$ ). In the light phases, this association was weaker

| TPF during BL | WT             | KO             |
|---------------|----------------|----------------|
| Light         | $7.77\pm 0.03$ | $7.64\pm 0.04$ |
| Dark          | $8.13\pm 0.04$ | $8.28\pm 0.07$ |

383

384

385

Table 4: Average TPF during baseline light and dark (mean  $\pm$  SEM) in TDW

386 (dark vs. light: paired t-test: slope:  $t(32)=7.8$ ,  $p<0.0001$ ; Fisher Z-transformed  $R^2$ -values:  $t(32)=5.9$ ,  
387  $p<0.0001$ ), but again did not differ between genotypes (WT:  $0.07\pm 0.01$ , KO:  $0.09\pm 0.01$ ,  $t(31)=1.2$ ,  
388  $p=0.23$ ;  $R^2$ : WT:  $0.59\pm 0.04$ ; KO:  $0.67\pm 0.05$ , t-test on the Fisher Z-transformed  $R^2$ -values:  $t(31)=1.2$ ,  
389  $p=0.23$ ). However, during the light phases, when LMA and TDW are substantially reduced and  
390 estimates of TPF during TDW are less precise, we found more non-significant associations in both  
391 genotypes (KO: 3/ 16; WT: 3/ 17 mice). Altogether, these results provide further evidence that LMA  
392 contributes to TPF and suggests that CIRBP, through its effects on LMA, reduces TPF.

393 The SD altered the distribution of waking during the recovery relative to BL (3-way RM ANOVA,  
394 factor Time, GT and BL/REC, factor BL/REC: REC1:  $F(1,558)=42.7$ ,  $p<0.0001$ ; REC2:  $F(1,1514)=441.8$ ,  
395  $p<0.0001$ ; see triangles in REC1 and REC2, Figure 6-A). Surprisingly, while time spent awake was  
396 overall decreased compared to baseline, we observed several intervals during the recovery in which  
397 TDW was increased (3-way RM ANOVA, factor Time, GT and BL/REC, factor BL/REC: REC1:  
398  $F(1,558)=13.9$ ,  $p=0.0002$ ; REC2:  $F(1,1514)=233.8$ ,  $p<0.0001$ ; Figure 6-A, upwards pointing triangles).  
399 This was true for both genotypes. Moreover, genotype differences in the distribution of waking and  
400 TDW became significant during the dark phases of both recovery days, with *Cirbp* KO mice  
401 spending more time awake and in TDW than WT mice (Figure 6-A; see post-hoc tests indicated by  
402 red line), as if SD amplified the non-significant genotype differences during BL (3-way RM ANOVA  
403 on hourly values: factor GTxTimexSD: total waking:  $F(41,1271)=1.4$ ,  $p=0.04$ ; TDW:  $F(41,1271)=1.4$ ,  
404  $p=0.056$ ) but not for LMA ( $F(41,1271)=1.0$ ,  $p=0.48$ ).

405 The EEG spectra during TDW in REC1 and REC2 showed similar profiles as during BL (see Figure  
406 6, figure supplement 2), although there were some changes that in recovery reached significance

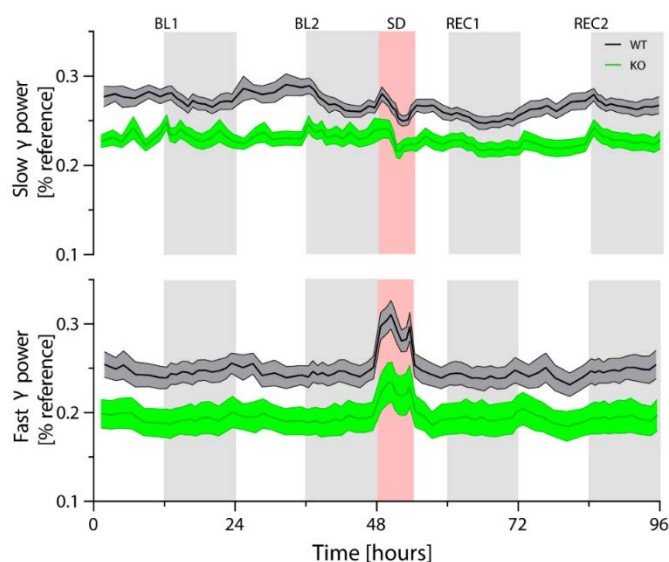

Figure 6, supplement 2 **Slow and fast gamma power over the course of the experiment.** *Cirbp* KO (green lines and areas) and WT (black line, grey areas) mice (areas span  $\pm 1$ SEM range). BL: baseline, SD: Sleep deprivation, REC: Recovery. Power in both slow [32-45Hz] and fast [55-80Hz] gamma is significantly reduced over the course of the experiment in *Cirbp* KO mice (2-way ANOVA: factor GT: slow gamma:  $F(1,34)=11.9$ ,  $p=0.002$ ; fast gamma:  $F(1,33)=6.6$ ,  $p=0.01$ ). Like the analysis of delta power, power in the gamma bands is calculated based on intervals to ensure an equal contribution of epochs to each time point: 6 intervals in the light phase, 12 in the dark periods, 8 in the sleep deprivation and 4 during the recovery light period.

407 such as the increase in the delta power band. Along those lines, the non-significant increase in TPF  
408 in *Cirbp* KO mice during the BL dark phases became significant in the REC dark phases (REC1: WT:  
409  $8.1 \pm 0.05$ , KO:  $8.4 \pm 0.07$ ,  $t(35)=2.7$ ,  $p=0.01$ ; REC2: WT:  $8.2 \pm 0.05$ , KO:  $8.5 \pm 0.08$ ,  $t(35)=2.6$ ,  $p=0.01$ ). Also,  
410 the non-significant difference in slope at the group level between TPF and LMA during BL (Figure  
411 6-C), became significant after SD (ANCOVA,  $F(1,29)=5.8$ ,  $p=0.02$ ), providing further evidence that  
412 the suggestive genotype differences under baseline conditions become more pronounced after a  
413 challenge of the sleep homeostat.

414 Taken together, *Cirbp* KO mice were more active during the dark phase, which partly explains  
415 the faster TPF. Moreover, KO mice had less EEG power in the gamma band of TDW, and the 6-  
416 hour SD strengthened genotype differences in the sleep-wake distribution and EEG activity.

## 417 Discussion

418

419 In this study, we showed that, like in other rodents, the sleep-wake distribution is the major  
420 determinant of  $T_{cx}$  in the mouse. Because of the well-established link between temperature and  
421 CIRBP levels, it is likely that the equally well-known sleep-wake driven changes in *Cirbp* expression  
422 in the brain are conveyed through the sleep-wake driven changes in brain temperature. As  
423 predicted, the SD-incurred changes in the expression of clock genes was modulated by the presence  
424 of CIRBP. However, only for *Rev-Erb $\alpha$*  did we observe the anticipated attenuated response to SD in  
425 *Cirbp* KO mice, whereas the changes in the expression of *Per2* and *Clock* were amplified compared  
426 to WT mice. Moreover, we did discover evidence of altered dynamics of the process regulating time  
427 spent in REM sleep. Unexpectedly, *Cirbp* KO mice are more active during the dark phase, and have  
428 during TDW reduced power in the gamma band and increased TPF.

429

### 430 CHANGES IN CORTICAL TEMPERATURE ARE SLEEP-WAKE DRIVEN

431 When sleep and waking occur at their appropriate circadian times, the changes in both brain  
432 and body temperature have a clear 24-hour rhythm and therefore appear as being controlled  
433 directly by the circadian clock. However, sleep-wake cycles contribute significantly to both the daily  
434 changes in brain and body temperature. In humans, this involvement is powerfully illustrated by  
435 spontaneous desynchrony, where body temperature follows both a circadian and an activity-rest  
436 (and presumably, sleep-wake) dependent rhythm (Wever, 1979). The contribution of sleep-wake  
437 state to the daily dynamics in body temperature is further supported by forced desynchrony studies,  
438 such as (Dijk and Czeisler, 1995), estimating that ‘masking’ effects of rest-activity and sleep-wake  
439 cycles contributed between 30% and 50% to the amplitude of the circadian body temperature  
440 rhythm (Hiddinga et al., 1997, Dijk et al., 2000). Not only in humans but also in smaller animals like  
441 rats, a circadian and rest-activity component contribute to the circadian fluctuations in body  
442 temperature (Cambras et al., 2007). Thus, the circadian amplitude of body temperature is amplified  
443 when wake and sleep occur at the appropriate phase of the circadian rhythm.

444 In contrast to body temperature, brain temperature in rodents is much more determined by  
445 sleep-wake state: 80% of its variance can be explained by the sleep-wake distribution ((Franken et  
446 al., 1992) and this study). Likewise, the sleep-wake driven changes in brain temperature are still  
447 present in arrhythmic animals (Edgar et al., 1993, Baker et al., 2005), pointing to a more important  
448 sleep-wake dependency of brain temperature compared to body temperature. In our study, we also



449 estimated the contribution of LMA to changes in  $T_{cx}$  and found that waking with higher LMA is  
450 associated with higher  $T_{cx}$ . Although significant, the contribution of LMA to the daily changes in  
451  $T_{cx}$  was modest and explained only 2% more of the variance compared to waking alone. Can we  
452 optimize the prediction of  $T_{cx}$ ? A non-linear relationship between sleep-wake state and  $T_{cx}$  was  
453 assumed previously (Franken et al., 1992) and could have improved the prediction of our model  
454 further. This is supported by the residuals from the complete model (see Figure 3, supplement 2),  
455 that exhibit under baseline conditions a circadian distribution, whereas during the SD, they remain  
456 increased as during the dark phase. Thus, the model overestimates  $T_{cx}$  during periods with little  
457 waking (light phase) and underestimates  $T_{cx}$  during periods that are dominated by waking (dark  
458 phase and SD), suggesting a non-linear relationship between these two variables.

459 Important to consider is that the influence of LMA on  $T_{cx}$  is likely affected by the type of activity;  
460 for example, rats on a running wheel activity can increase their brain temperature by 2°C within 30  
461 minutes (Fuller et al., 1998). Also exercise in men leads to an increase in (proxies) of brain  
462 temperature (Nybo et al., 2002). Thus, although in our study the effect of LMA to  $T_{cx}$  was very  
463 modest compared to the effect of waking on  $T_{cx}$ , these contributions likely differ with various types  
464 of physical activity.

465

#### 466 LMA-DEPENDENT AND INDEPENDENT CHANGES IN WAKING CHARACTERISTICS

467 Little is known about the role of CIRBP in neuronal and behavioral functioning. It was therefore  
468 unanticipated that *Cirbp* KO mice were more active during the dark phase. Neither were the  
469 changes in neuronal oscillations during TDW: a reduction in low- and high gamma power and an  
470 increase in TPF. Because increased running speed correlates with increased hippocampal TPF  
471 (Jeewajee et al., 2008), and our measured TPF is mainly of hippocampal origin (Buzsáki, 2006), we  
472 indeed can relate the increased TPF to the increase in LMA in KO mice. In contrast to TPF, the  
473 literature has not consistently reported on a relation between the general decrease in gamma power  
474 during active waking and its relation to LMA. Some studies have found that increased speed of  
475 movement relates to increased power in the gamma band (Furth et al., 2017, Niell and Stryker, 2010,  
476 Vinck et al., 2015), whereas others found that this association is only present in higher gamma  
477 frequencies [ $>60\text{Hz}$ ] (Zheng et al., 2015). Thus, it is unclear if LMA relates to changes in gamma  
478 power. However, there is a clear increase in power of the high gamma band specifically during the  
479 SD (see Figure 6, supplement 2), as noted previously (Vassalli and Franken, 2017). This increase was  
480 present in both genotypes suggesting that while KO mice seem to have a reduced capacity to

481 produce fast gamma activity, SD is still able to activate their fast-gamma circuitry. These results,  
482 together with the observation that during the light phase the decreased power in the gamma bands  
483 was still present at a time of day when LMA did not significantly differ, argue against an association  
484 between the decreased power in the gamma bands of *Cirbp* KO mice and their increased LMA.

485 Interestingly, gamma oscillations are associated with a palette of cognitive processes [reviewed  
486 in (Bosman et al., 2014)]. This is further supported by associations between behavioral impairments  
487 and changes in gamma power. For example, mice with abnormal interneurons are impaired at the  
488 behavioral level (*e.g.* lack of cognitive flexibility) and have a reduction in task-evoked gamma power  
489 in their EEG. Pharmacological stimulation of inhibitory GABA-neurons augmented power in the  
490 gamma band and rescued the behavioral phenotype of the mutants (Cho et al., 2015).

491 In the hippocampus, gamma-theta coupling, *i.e.* the occurrence of gamma oscillations at a  
492 specific phase of the theta oscillation, has been suggested to aid processes underlying memory [for  
493 review see (Colgin, 2015)]. Because CIRBP slows down TPF and increases power in the gamma  
494 bands, further analyses and experiments can address if *Cirbp* KO mice have altered phase coherence  
495 between these two frequency bands. Together with the postulated function of gamma power in  
496 cognitive flexibility, it would be interesting to assess if the spectral phenotype in *Cirbp* KO mice is  
497 associated with behavioral abnormalities.

498 Several aspects of waking that appeared to differ between *Cirbp* KO and WT mice under baseline  
499 dark conditions but were non-significant, reached significance during the recovery dark phase. For  
500 example, during baseline *Cirbp* KO mice were 4% more awake and 13% more in TDW compared to  
501 their WT littermates, which was amplified to 8% and 20%, respectively, during recovery. Also, TPF  
502 and the genotype-dependent association between overall TPF and LMA reached significance during  
503 the recovery. This suggest that SD amplified the genotypic differences. Other sleep deprivation  
504 studies found evidence for similar phenomena, where sleep disturbance can amplify molecular and  
505 behavioral phenotypes of Alzheimers' mouse models (for review, see (Musiek and Holtzman, 2016))  
506 and sensitivity to pain (Sutton and Opp, 2014). Our data indicates that a similar phenomenon  
507 occurs in *Cirbp* KO mice, where a single 6-hr SD reveals the suggestive baseline genotypic  
508 differences. It would be interesting to understand the dynamics of this change; *e.g.* if they are  
509 reversible or if a second SD could augment genotypic differences further.

510

511

512

513 CIRBP ADJUSTS CLOCK GENE EXPRESSION AND REM SLEEP RECOVERY FOLLOWING SD

514 CIRBP modulated the cortical response to SD in the expression of three out of the five clock  
515 genes quantified. As anticipated, the SD incurred decrease in cortical *Rev-erb $\alpha$*  was attenuated in  
516 *Cirbp* KO mice. REV-ERB $\alpha$  acts as a transcriptional repressor of positive clock elements such as  
517 BMAL1 (Preitner et al., 2002). Mice lacking both *Rev-erb $\alpha$*  and its homolog *Rev-erb $\beta$*  have a shorter  
518 and unstable period under constant conditions and deregulated lipid metabolism (Cho et al., 2012).  
519 We recently established that *Rev-erb $\alpha$*  also partakes in several aspects of sleep homeostasis: *Rev-*  
520 *erb $\alpha$*  KO mice accumulate at a slower rate NREM sleep need and have reduced efficiency of REM  
521 sleep recovery in the first hours after SD (Mang et al., 2016).

522 The expression of the clock genes *Per2* and *Clock* was also modulated in the absence of CIRBP,  
523 suggesting that parts of the core clock are sensitive to the presence of CIRBP in response to SD.  
524 Given the role of clock genes in sleep homeostasis (Franken, 2013), the modulated clock gene  
525 expression in KO mice could have contributed to the REM homeostatic sleep phenotype. This is  
526 supported by studies showing that mutations in clock genes incurred a loss in REM sleep recovery  
527 [*i.e.* CLOCK (Naylor et al., 2000)], or impacted the initial efficiency of REM sleep recovery [*i.e.* DBP  
528 (Franken et al., 2000), PER3 (Hasan et al., 2011), and REV-ERB $\alpha$  (Mang et al., 2016)]. Follow-up  
529 studies can address if indeed the changes in clock gene expression in *Cirbp* KO mice are functionally  
530 implicated in the REM sleep phenotype.

531 The other aspects of the homeostatic regulation of sleep that we inspected, NREM EEG delta  
532 power and time spent in NREM sleep after sleep deprivation, were unaffected in *Cirbp* KO mice.  
533 Thus, CIRBP participates specifically in REM sleep homeostasis, whereas we do not find evidence  
534 for its participation in NREM sleep homeostatic mechanisms.

535

536 OTHER MECHANISMS LINKING SLEEP-WAKE STATE TO CLOCK GENE EXPRESSION

537 Our results show that other pathways besides CIRBP must contribute to the sleep-wake driven  
538 changes in clock gene expression. Some suggestions for such pathways are shortly discussed below,  
539 as well considerations that could potentially account for the absence of a more widespread CIRBP  
540 dependent change in clock gene expression that we expected based on *in vitro* results.

541 *Rbm3* (RNA Binding Motif Protein 3), another cold-inducible transcript which is closely related  
542 to CIRBP, also conveys temperature information into high amplitude clock gene expression *in vitro*  
543 (Liu et al., 2013). Like *Cirbp*, its expression is sleep-wake driven (Wang et al., 2010). Thus, RBM3  
544 might be another mechanism through which changes in sleep-wake state are linked to changes in

545 clock gene expression and could therefore also explain the absence of a widespread CIRBP  
546 dependent SD-incurred change in clock gene expression. A follow-up study could address this  
547 possibility by quantifying the SD-evoked changes in clock gene expression in double *Cirbp-Rbm3*  
548 KO mice.

549 Heat shock factor 1 (*Hsfi*) is a member of the heat shock pathway and *in vitro* studies showed  
550 that it conveys temperature information to the circadian clock by initiating *Per2* transcription  
551 through binding to *Per2*'s upstream heat shock elements (Tamaru et al., 2011). Under undisturbed  
552 conditions, both *Hsfi* mRNA and protein levels are constitutively expressed, but the protein exhibits  
553 daily re-localization during the dark phase to the nucleus where it acts as a transcription factor  
554 (Reinke et al., 2008). Interestingly, CIRBP binds to the 3'UTR of *Hsfi* transcript [(Morf et al., 2012),  
555 see supplementary data therein], although it is unclear if this affects the transcriptional activity of  
556 HSF1. We found that SD induced a significant increase in *Hsfi* only in KO mice, which is congruent  
557 with the observation that the expression of two other transcripts downstream of HSF1, *Hsp90b* and  
558 *Hspa5/BiP*, was significantly amplified in KO mice after SD. Altogether, this suggests that the  
559 increased expression of *Per2* in KO mice might be linked to increased *Hsfi* expression, and  
560 underscores the presence of other temperature (and thus sleep-wake) driven pathways that can  
561 ultimately affect clock gene expression.

562 Beyond temperature, many other physiological changes occur during wakefulness that can  
563 subsequently affect clock gene expression. For example, oxygen consumption changes with sleep-  
564 wake state (Jung et al., 2011) and oxygen levels can modulate the expression of clock genes through  
565 HIF1 $\alpha$  (Adamovich et al., 2017). Moreover, during SD, corticosterone levels increase which  
566 subsequently amplifies the expression of some, but not all, clock genes (Mongrain et al., 2010).

567 Another factor to consider is that the SD-incurred changes in clock gene expression depend also  
568 on an intact clock gene circuitry. For example, *Npas2* KO mice showed a reduced increase in *Per2*  
569 expression in the forebrain after SD (Franken et al., 2006), while *Cry1,2* double-KO mice display a  
570 larger increase in *Per2* expression after SD (Wisor et al., 2008). Thus, differences in clock gene  
571 circuitry, as suggested by the *in vitro* data (Liu et al., 2013, Morf et al., 2012), could also have  
572 contributed to the observed changes in clock gene expression after SD in *Cirbp* KO.

573 We could not corroborate the hepatic increase in heat shock transcripts (*Hsfi*, *Hsp90b* and  
574 *Hspa5*) and in *Per2* after SD as reported in other studies (Diessler et al., 2018, Maret et al., 2007),  
575 whereas we did confirm the SD-induced changes in *Cirbp*, *Rbm3-short*, *Dbp* and *Rev-erb $\alpha$* . We  
576 cannot readily explain this lack of confirmation.

577 Finally, we would like to briefly address an obvious shortcoming. The hypothesis of this study  
578 is based on results obtained in a relatively simple biological model (*i.e.*, immortalized fibroblasts)  
579 and applied to a much more complex model (*i.e.*, cortices and livers of male mice). Unpublished  
580 observations on the circadian dynamics of the expression of CLOCK-BMAL1 target genes in the  
581 liver, such as *Rev-erba* and *Dbp*, show an increased circadian amplitude in *Cirbp* KO mice; *i.e.* the  
582 opposite phenotype from that observed *in vitro* (Schibler et al., 2015). Along those lines, we could  
583 not consistently reproduce the importance of CIRBP in determining the *ext/com* ratio of *Sfpq* (see  
584 also Figure 4-B). Thus, *in vitro* findings will not always predict *in vivo* results, which could account  
585 for the lack of a widespread CIRBP-dependent change in clock gene expression after SD.

586

## 587 CONCLUSION

588 This hypothesis-driven study explored whether the SD-induced changes in clock gene  
589 expression could be mediated through the cold-induced transcript CIRBP. After SD, the cortical  
590 expression of *Rev-erba*, which we recently identified as a player in the sleep homeostat (Mang et  
591 al., 2016), was attenuated in *Cirbp* KO mice, whereas the expression of two other clock genes, *Per2*  
592 and *Clock*, was amplified. Thus, the SD induced changes in clock gene expression are, in part,  
593 modulated by CIRBP.

594 A large body of evidence has shown that clock genes are crucial for metabolism (reviewed in  
595 (Panda, 2016)). This is supported by the observation that disturbance of clock gene expression,  
596 through for example genetic manipulations in mice or shift work in humans, can lead to the  
597 development of metabolic disorders (Rudic et al., 2004) (Karlsson et al., 2001). Not only sleeping at  
598 the wrong time, but also sleeping too little or of poor quality can induce disturbed metabolic state  
599 both in rats (Barf et al., 2010) and humans (Copinschi et al., 2014). Because sleep loss affects clock  
600 gene expression (Franken, 2013), we propose that this could represent a common pathway through  
601 which both sleep and circadian disturbances lead to metabolic pathologies. It is thus of importance  
602 to determine the pathways through which a disturbed sleep-wake distribution affects clock gene  
603 expression. We show that temperature and CIRBP partake in this process, and we identified the  
604 expression of *Rev-erba* as one of the genes affected by CIRBP. Genetic (Delezie et al., 2012) and  
605 pharmacological (Solt et al., 2012) studies have shown that this transcriptional repressor is  
606 important for healthy metabolic functioning. Further experiments could address the metabolic  
607 consequences of the attenuated response in *Rev-erba* to sleep loss.

608

609 **Acknowledgements**

610 We would like to thank Maxime Jan for his help in constructing the linear mixed model, our  
611 colleagues for their assistance with the sleep deprivations, Hannes Richter from the Genomic  
612 Technology Facility, for his support when setting up the RT-qPCR, David Gatfield and Bulak Arpat  
613 for fueling insightful discussions, and Jun Fujita (Kyoto University, Japan) for sharing the *Cirbp* KO  
614 mice. This study was performed at the University of Lausanne, Switzerland, and supported by the  
615 Swiss National Science Foundation (SNF n°146694 to PF supporting MMBH) and the state of Vaud  
616 (supporting MMBH, YE and PF).

617

## 618 **Material and Methods**

### 619 MICE AND HOUSING CONDITIONS

620 *Cirbp* KO mice, kindly provided by Prof Jun Fujita (Kyoto University, Japan), were maintained  
621 on a C57BL6/J background. In these mice, *Cirbp* exons were replaced by a TK-neo gene through  
622 homologous recombination in D3 embryonic stem cells, resulting in the absence of the *Cirbp*  
623 transcript and protein (Masuda et al., 2012). Breeding couples or trios consisted of heterozygous  
624 male and female mice. WT littermates were used as controls. Throughout all the experiments, mice  
625 were individually housed in polycarbonate cages (31×18×18 cm) with food and water *ad libitum* and  
626 exposed to a 12 h light/12 h dark cycle (70–90 lux). All experiments were approved by the Ethical  
627 Committee of the State of Vaud Veterinary Office Switzerland under license VD2743 and 3201.

628

### 629 EEG/EMG AND THERMISTOR SURGERY

630 At the age of 9 to 13 weeks, 17 KO and 20 WT male mice were implanted with  
631 electroencephalogram (EEG) and electromyogram (EMG) electrodes (8 experimental cohorts). The  
632 surgery took place under deep xylazine/ ketamine anesthesia supplemented with isoflurane (1%)  
633 when necessary; for details see (Mang and Franken, 2012). Briefly, six gold-plated screws (diameter  
634 1.1 mm) were screwed bilaterally into the skull over the frontal and parietal cortices. Two screws  
635 served as EEG electrodes and the remaining four anchored the electrode connector assembly to the  
636 skull. As EMG electrodes, two gold wires were inserted into the neck musculature. Of all EEG/EMG  
637 implanted mice, 8 KO and 9 WT mice were additionally implanted with a thermistor (serie  
638 P20AAA102M, General Electrics (currently Thermometrics), Northridge, California, USA) which  
639 was placed on top of the right cortex (2.5 mm lateral to the midline, 2.5 mm posterior to bregma).  
640 The EEG and EMG electrodes and thermistor were soldered to a connector and cemented to the  
641 skull. Mice recovered from surgery during 5–7 days before they were connected to the recording  
642 cables in their home cage for habituation, which was at least 6 days prior to the experiment. In total  
643 no less than 11 days were scheduled between surgery and start of experiment.

644

### 645 EXPERIMENTAL PROTOCOL AND DATA ACQUISITION

646 EEG and EMG signals,  $T_{cx}$  and LMA were recorded continuously for 96 h. The recording started  
647 at light onset; i.e., Zeitgeber Time (ZT)0. During the first 48 h (days BL1 and BL2), mice were left  
648 undisturbed to establish a baseline. Starting at ZT0 of day 3, mice were sleep deprived by gentle  
649 handling for 6 hours (ZT0–6), as described in (Mang and Franken, 2012). The remaining 18 h of day

650 3 and the entire day 4 were considered as recovery (days REC<sub>1</sub> and REC<sub>2</sub>, respectively). The analog  
651 EEG and EMG signals were amplified (2,000×), digitized at 2 kHz and subsequently down sampled  
652 to 200 Hz and stored. The EEG was subjected to a discrete Fourier transformation yielding power  
653 spectra (range: 0–100 Hz; frequency resolution: 0.25 Hz; time resolution: consecutive 4-sec epochs;  
654 window function: Hamming). Thermistors were supplied with a constant measuring current ( $I_{const}$   
655 = 100 microA), and voltage ( $V$ ) was measured at 10 Hz to calculate the median resistance ( $R_t$ ) per 4-  
656 s epoch as in eq. (1).

$$657 \quad (1) R_t = \frac{V}{I_{const}}$$

658 Each thermistor has an individual material constant,  $\beta$ . The resistance was measured at 25°C ( $R_{25^\circ C}$ )  
659 and 37°C ( $R_{37^\circ C}$ ) by the manufacturer, and used to determine  $\beta$  as in eq.(2), with T values in Kelvin  
660 (°C + 273.15).

$$661 \quad (2) \beta = \frac{T_{25} * T_{37}}{T_{25} - T_{37}} * \ln \frac{R_{37^\circ C}}{R_{25^\circ C}}$$

662  
663 Following on eq. (2), the temperature ( $t$ ) in °C can be calculated as described in eq. (3).

$$664 \quad (3) t(^{\circ}C) = \left[ \frac{1}{\beta} * \log \left[ \frac{R_t}{R_{25^\circ C}} \right] + \frac{1}{T_{25^\circ C}} \right]^{-1} - 273.15$$

665  
666 The EEG, EMG, and voltage across the thermistor were recorded with Hardware (EMBLA) and  
667 software (Somnologica-3) purchased from Medicare Flaga (EMBLA, ResMed, USA). LMA was  
668 detected with passive infrared sensors (Visonic Ltd, Tel Aviv, Israel) and quantified with ClockLab  
669 software (ClockLab, ActiMetrics, Wilmette, Illinois, USA).

## 670 671 ANALYSIS OF LMA

672 To inspect the time course of LMA corrected for time-spent-awake, raw LMA was expressed per  
673 unit of waking in percentiles to which an equal amount of time-spent-awake contributed (as in  
674 Figure 3-G). The number of percentiles per recording period were chosen according to the  
675 prevalence of wakefulness, where 6 percentiles were used during the light phase and 12 during the  
676 dark phase, with the exception for 6 sections during the SD and 3 sections during the remaining  
677 6hrs of the light phase of REC<sub>1</sub>. To assess genotype differences in LMA (Figure 6), the absolute  
678 number of movements were inspected. The LMA recordings of four mice (3 WT, 1 KO) were  
679 interrupted due to technical problems during the experiment, leaving data from 17 WT and 16 KO  
680 mice for analyses involving LMA.



681 We determined in 5 WT and 7 KO mice after the EEG-based sleep phenotyping their circadian  
682 period under at least two weeks of constant darkness. Period length was determined by Chi-squared  
683 test with ClockLab software (ClockLab, ActiMetrics, Wilmette, Illinois, USA).

684

#### 685 DETERMINATION OF BEHAVIORAL STATES

686 Offline, the mouse's behavior was visually classified as 'Wakefulness', 'REM sleep', or 'NREM  
687 sleep' for consecutive 4-sec epochs based on the EEG and EMG signals, as previously described  
688 (Mang and Franken, 2012). Wakefulness was characterized by EEG activity of mixed frequency and  
689 low amplitude and variable muscle tone. NREM sleep was defined by synchronous activity in the  
690 delta frequency range (1–4 Hz), and low and stable muscle tone. REM sleep was characterized by  
691 regular theta oscillations (6–9 Hz) with low EMG activity. Waking was further differentiated into  
692 'quiet waking' and 'theta-dominated waking' (TDW). TDW was determined based on the relative  
693 importance of power in the 6.5 to 12.0 Hz range to the overall power in the EEG of an artefact-free  
694 epoch scored as wakefulness, as described in (Vassalli and Franken, 2017). We refer to waking that  
695 is not classified as TDW as 'quiet' waking. Epochs containing EEG artefacts were marked according  
696 to the state in which they occurred and excluded from EEG spectral analysis but included in the  
697 sleep-wake distribution analyses. During the four day recording,  $7.0 \pm 0.9\%$ ,  $2.1 \pm 0.3\%$  and  $2.5 \pm$   
698  $0.2\%$  of the epochs were scored as an artefact in waking, NREM, and REM sleep, respectively, and  
699 this did not differ between genotypes (t-tests,  $t(35)=1.77$ ,  $p=0.09$ ;  $t(35)=0.64$ ,  $p=0.53$ ;  $t(35)=0.99$ ,  
700  $p=0.33$ , respectively).

701

#### 702 ANALYSIS OF CORTICAL TEMPERATURE

703 The raw  $T_{cx}$  data showed unexpected variation. Therefore, we inspected the inter-individual  
704 variation in daily amplitude and absolute  $T_{cx}$  levels. The latter was determined in two ways: i) by  
705 averaging  $T_{cx}$  during the last five hours of SD, thus minimizing the sleep-wake state incurred  
706 differences in  $T_{cx}$ , and ii) by averaging  $T_{cx}$  during the 12h baseline light phase. These measures were  
707 highly correlated ( $R^2=0.99$ ;  $p<0.0001$ ). Variation in the daily amplitude was quantified by averaging  
708 the difference between the highest and lowest hourly mean of  $T_{cx}$  of each of the two baseline days.  
709 No effect of genotype on absolute average  $T_{cx}$  or amplitude was detected (t-test,  $t(12)=0.61$ ,  $p=0.55$ ;  
710  $t(12)=-0.63$ ,  $p=0.54$ , respectively). Two mice (one of each genotype) exhibited a ca. 2-fold reduction  
711 in amplitude together with  $2^\circ\text{C}$  higher values during the SD relative to the other mice (Figure 7,  
712 pink symbols). Therefore, we excluded these two mice from subsequent  $T_{cx}$  analysis. Three other

713 mice (2 WT and 1 KO) showed normal amplitude but overall lower absolute values (Figure 7, blue  
714 symbols). We corrected for this difference by raising their  $T_{cx}$  values by the difference between the  
715  $T_{cx}$  reached in each of these 3 mice during the SD to the average  $T_{cx}$  reached over the same recording  
716 period in the remaining 9 mice. Of note, most of our  $T_{cx}$  analysis focuses on its relative sleep-wake  
717 dependent changes, which are not affected by differences in absolute  $T_{cx}$  values. Finally, the baseline  
718  $T_{cx}$  data that was used to construct Figure 2B was based on 7 WT and 7 KO mice. During the  
719 recording, one KO mouse and one WT mouse had random fluctuations of  $T_{cx}$  beyond physiological  
720 reach and were therefore excluded from analysis involving the daily dynamics of  $T_{cx}$  (Figure 3). In  
721 the recovery, a KO mouse was excluded due to aberrant high  $T_{cx}$  that could not be accounted for  
722 by the sleep-wake distribution, leaving 6 WT and 5 KO mice for analyses involving REC1 and REC2.

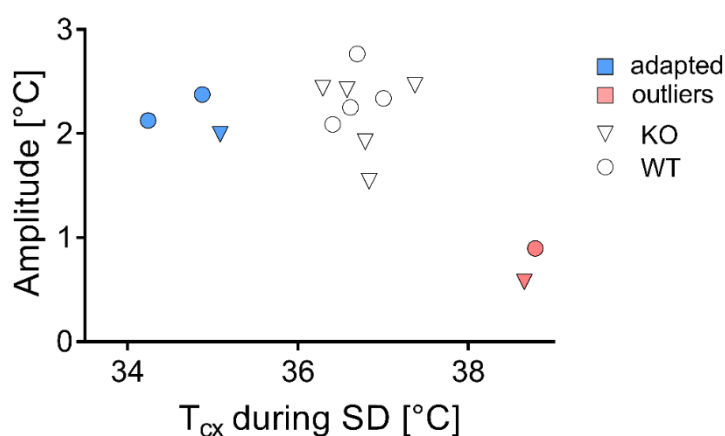

Figure 7 **Assessment of amplitude and absolute values of cortical temperatures.** Two outliers were detected (pink), whereas three others were corrected for their low values (blue).

723  
724 Because visualization of all 4-s epochs occurring in 24-hour day is not compatible with the  
725 resolution of Figure 2-A, sleep-wake states were averaged per minute and assigned to either wake,  
726 NREM or REM sleep. Because REM sleep occurs less and in shorter bouts than waking and NREM  
727 sleep, this stage is slightly underrepresented in the hypnogram of Figure 2-A.  $T_{cx}$  was averaged per  
728 minute.

729 We inspected  $T_{cx}$  1.5 min before and after sleep-wake transitions (*i.e.*, transitioning from wake  
730 to NREM sleep, NREM to REM sleep, REM sleep to wake and NREM sleep to wake). A sleep-wake  
731 transition was selected when the state before and after the transition lasted at least 8 epochs (*i.e.*  
732 >32 sec). With this criterion, an average of 38 wake to NREM sleep, 101 NREM sleep to REM sleep,  
733 28 REM sleep to wake and 32 NREM sleep to wake transitions per mouse during the two baseline  
734 days was detected. The temperature profile of  $T_{cx}$  before and after the transition was constructed  
735 by depicting  $T_{cx}$  relative to the mean  $T_{cx}$  at a given sleep-wake transition (*i.e.*, the average of  $T_{cx}$  in

736 the epoch before and after the sleep-wake transition). We subsequently constructed an individuals'  
737 average change in  $T_{cx}$  for each sleep-wake transition. For this average, at least 10 traces were  
738 contributing at a given point in time to prevent skewing of the average individual temperature  
739 profile by few  $T_{cx}$  traces. Thus, the further from the sleep-wake state transition, the less epochs  
740 contributed to the average individual  $T_{cx}$  profile. One WT mouse exhibited an extreme drop in  $T_{cx}$   
741 ( $-0.2^{\circ}\text{C}$  in a 4-second epoch) after the transition from NREM sleep to wake in its average  $T_{cx}$  trace,  
742 but not in other sleep-wake transitions. We attributed this observation to a technical artefact and  
743 therefore this mouse was excluded from the NREM sleep to wake transitions.

744 The residuals of the correlation between waking and  $T_{cx}$  exhibited a circadian pattern under  
745 baseline conditions. We visualized the properties of this pattern further by fitting a sinewave  
746 through the data (Prism, non-linear regression; sine-wave with non-zero baseline; least squares fit).

747

#### 748 ANALYSIS OF EEG BASED ON BEHAVIORAL STATE

749 Unless otherwise stated, all mice (20 WT and 17 KO) were included in the analyses based on the  
750 EEG data. Spectral content of the EEG within sleep-wake states was calculated as follows. To  
751 account for inter-individual differences in overall EEG power, EEG spectra were expressed as a  
752 percentage of an individual reference value calculated as the total EEG power across 0.75-45 Hz and  
753 all sleep-wake states in the 48h baseline. This reference value was weighted so that for all mice the  
754 relative contribution of the three sleep-wake states (wake, NREM and REM sleep) to this reference  
755 value was equal.

756 Theta peak frequency (TPF) was calculated by determining the frequency at which power  
757 density peaks per 4-s epoch and subsequently averaged per individual. Power density peaks were  
758 quantified from 6.5 to 12.0 Hz band and from 5.5 to 12.0 Hz band for TDW and REM sleep,  
759 respectively.

760 Time course analysis of EEG delta power (*i.e.*, the mean EEG power density in the 0.75-4.0 Hz  
761 range in NREM sleep) during baseline and after SD was performed as described previously (Franken  
762 et al., 1999), and similar to the analysis of LMA per unit of waking. The light periods of BL<sub>1</sub>, BL<sub>2</sub>,  
763 and REC<sub>2</sub> were divided into 12 percentiles, the REC<sub>1</sub> light period (ZT6-12) into 8 sections, and all  
764 dark periods into 6 sections. The timing of these percentiles was based on the prevalence of NREM  
765 sleep. EEG delta power values in NREM sleep were averaged within each percentile and then  
766 expressed relative to the mean value reached in the last 4hr of the two main rest periods in baseline  
767 between ZT8-12. This reference was selected because delta power reaches lowest values at this time

768 of the day and is least influenced by differences in prior history of sleep and wakefulness (see also  
769 (Franken et al., 1999)). In the time course of NREM delta power, one mouse (KO) demonstrated a  
770 strong decrease over the course of the experiment which could not be attributed to changes in the  
771 sleep-wake distribution. 9 out of the 12 delta power values during the light phase of REC2 in this  
772 mouse were outliers (MAD outlier test, consult (Leys et al., 2013) for details). This mouse was  
773 excluded from the analyses involving sleep homeostasis (Figure 5).

774 The effect of 6hr SD on subsequent time spent in NREM and REM sleep was assessed by  
775 calculating the recovery-baseline difference in sleep time per 1hr intervals.

776

#### 777 SIMULATING NREM EEG DELTA POWER [PROCESS S]

778 We applied a computational method to predict the change in delta power during NREM sleep  
779 based on the sleep-wake distribution as described before (Franken et al., 2001). Process S is  
780 exponentially increasing with time constant  $\tau_i$  during waking and REM sleep, and exponentially  
781 decreasing by  $\tau_d$  during NREM sleep (eq. (4) and (5), respectively).

$$782 \quad (4) \quad S_{t+1} = UA - (UA - S_t) * e^{-\frac{dt}{\tau_i}}$$

$$783 \quad (5) \quad S_{t+1} = LA + (S_t - LA) * e^{-\frac{dt}{\tau_d}}$$

784 In these simulations, UA represents the upper asymptote, LA the lower asymptote and  $dt$  the  
785 time step of the iteration (4 seconds). Both asymptotes were estimated for each individual mouse.  
786 The upper asymptote was based on the 99% level of the relative frequency distribution of delta  
787 power reached in all 4s epochs scored as NREM sleep in the 4-day recording. As an estimate of the  
788 lower asymptote, the intersection of the distribution of delta power values in NREM sleep with  
789 REM sleep was taken. At the start of the simulation, an iteration through the first 24-hr (BL1) was  
790 performed with  $S_0=150$  at  $t=0$ . The value reached after 24-hrs is independent of  $S_0$  at  $t=0$  and,  
791 assuming a steady state during baseline, reflects Process S at the start of the baseline for a given  
792 combination of time constants.

793 The fit was optimized by minimizing the mean squared difference of simulated and observed  
794 NREM delta power for a range of  $T_i$ : 1-25 h, step size 0.125h;  $T_d$ : 0.1-5.0 h, step size 0.025h; *i.e.* the  
795 simulation was run for all 38'021 combinations of  $T_i$  and  $T_d$  for each mouse. The combination of  $T_i$   
796 and  $T_d$  giving the best fit was used to assess differences in process S between genotypes.

797 We noted a subtle but consistent linear discrepancy in the alignment of the simulated Process  
798 S to the measured NREM delta power values at the end of the light phase on BL1, BL2 and REC2

799 (Pearson correlation, slope $\neq$ 0: 1 sample t-test;  $t(35)=-4.38$ ,  $p=0.0001$ ). This change correlated well  
800 with the day-to-day changes in total spectral power in the EEG calculated across all sleep-wake  
801 states in BL1, BL2, and REC2 (Pearson correlation:  $R^2=0.70$ ,  $p<0.0001$ ;  $n=36$ ). There was no effect of  
802 genotype on slope ( $\Delta$  delta power %/h; students' t-test;  $t(34)=0.62$ ;  $p=0.54$ ; WT:  $-0.086\pm 0.027$ ; KO:  $-$   
803  $0.065\pm 0.021$ ) or intercept ( $t(34)=-0.88$ ;  $p=0.38$ ; WT:  $101.5\pm 0.62$ ; KO:  $100.7\pm 0.56$ ; WT:  $n=20$ , KO:  
804  $n=17$ ). We attributed these linear changes to be of non-biological origin and detrended the  
805 measured NREM delta power values before optimizing the fit between observed and simulated  
806 delta power.

807

## 808 GENE EXPRESSION IN LIVER AND BRAIN

809 Five mice of each genotype ( $n=15$  per genotype in total) were sacrificed either prior to SD (ZTo),  
810 at ZT6 allowing them to sleep *ad lib* (i.e. without SD; ZT6-NSD), or at ZT6 after 6h SD (ZT6-SD)  
811 across four experimental cohorts. Mice were randomly assigned to one of the three experimental  
812 conditions. Genes of interest included transcripts affected by SD (Maret et al., 2007, Mongrain et  
813 al., 2010) and/or by the presence of CIRBP (Liu et al., 2013, Morf et al., 2012) with a special interest  
814 for clock genes. Specific forward and reverse primers and Taqman probes were designed  
815 (see Supplementary File 1) to quantify mRNA.

816 Upon sacrifice, both the cerebral cortex and liver were extracted and immediately flash frozen  
817 in liquid nitrogen. Samples were stored at  $-80^{\circ}\text{C}$ . RNA from cortex was extracted and purified using  
818 the RNeasy Lipid Tissue Mini Kit 50 (QIAGEN, Hombrechtikon, Switzerland); RNA from liver was  
819 extracted and purified using the RNeasy Plus Mini Kit 50 (QIAGEN, Hombrechtikon, Switzerland),  
820 according to manufacturer's instructions. RNA quantity (NanoDrop ND-1000 spectrophotometer;  
821 Thermo Scientific, Wilmington, NC, USA) and integrity (Fragment Analyzer, Advanced Analytical,  
822 Ankeny, IA, USA) was measured and verified for each sample. 1000 ng of purified total RNA was  
823 reverse-transcribed in 20 $\mu\text{L}$  using a mix of First-strand buffer, DTT 0.1M, random primers 0.25 $\mu\text{g}/\mu\text{L}$ ,  
824 dNTP 10mM, RNAzin Plus RNase Inhibitor and Superscript II reverse transcriptase (Invitrogen, Life  
825 Technologies, Zug, Switzerland) according to manufacturers' procedures. The cDNA was diluted 10  
826 times in Tris 10 mM pH 8.0, and 2 $\mu\text{L}$  of the diluted cDNA was amplified in a 10 $\mu\text{L}$  TaqMan reaction  
827 in technical triplicates on an ABI PRISM HT 7900 detection system (Applied Biosystems, Life  
828 Technologies, Zug, Switzerland). Cyclor conditions were: 2 min at  $50^{\circ}\text{C}$ , 10 min at  $95^{\circ}\text{C}$  followed by  
829 45 cycles at  $95^{\circ}\text{C}$  for 15 s and  $60^{\circ}\text{C}$  for 1 min. Standard curves were calculated to determine the  
830 amplification efficiency (E). A sample maximization strategy was used where all biological

831 replicates of one tissue were amplified for two genes per plate. Gene expression levels were  
832 normalized to two reference genes (cortex: *Eef1a* and *Gapdh*; M=0.23, CV=0.09 and liver: *Gadph* and  
833 *Tbp*; M=0.32, CV=0.11) using QbasePLUS software (Biogazelle, Zwijnaarde, Belgium). *Rbm3* isoforms  
834 were in a separate run quantified in liver and cortex, again with their housekeeping genes (same as  
835 previously; cortex: M=0.22, and CV=0.08; liver: M=0.13, CV=0.05). Transcripts with an average Ct-  
836 value>30 were omitted from analysis (in KO and WT livers: *Rbm3*, *Dusp4*, *Homer1a* and *Npas2*; in  
837 cortex and liver of KO mice: *Cirbp*). Results are expressed as normalized relative quantity (NRQ)  
838 which based on the overall mean expression per gene, which was set at 1.0 (Hellemans et al., 2007).

839 CIRBP affects the poly-adenylation sites of several transcripts (Liu et al., 2013). We explored if  
840 this newly discovered role of CIRBP could be corroborated in our study by focusing on the transcript  
841 Splicing factor, proline and glutamine rich (*Sfpq*) which exhibits CIRBP-dependent alternative poly-  
842 adenylation (APA) ((Liu et al., 2013), see their Supplemental Fig4-5). We calculated the ratio of the  
843 prevalence of the external 3'UTR region over the common region according to eq. (6),

$$844 \quad (4) \text{Ratio}_{ext / comm} = \frac{E^{-Ct_{ext}}}{E^{-Ct_{comm}}}$$

845 where E is the amplification efficiency and  $Ct_{ext}$  and  $Ct_{comm}$  the number of cycles for the detection  
846 of the extended and common isoform, respectively.

847

## 848 STATISTICS

849 Statistics were performed in R (version 3.3.2) and Prism (version 7.0). The threshold of  
850 significance was set at p=0.05, and all statistics were solely performed on biological replicates. To  
851 be more specific, our RT-qPCR data stems from 5 biological replicates, whereas amplification of  
852 cDNA from one biological replicate is performed in three technical replicates. Deviations from the  
853 mean are representing standard error of the mean. The distribution of the LMA data was  
854 normalized by a  $\log_2$  transformation on the hourly values, allowing for subsequent parametric  
855 analyses on the relationship between  $T_{cx}$  and LMA as in Figure 3. Time course data were analyzed  
856 by 1- and 2-way repeated measures (RM) analysis of variance (ANOVA) with as factors 'time' and  
857 'genotype' (GT). Upon significance, post-hoc Fisher LSD tests were computed. Differences between  
858 BL and REC values within genotype were computed by paired t-tests. EEG spectra were also  
859 analyzed by 1- and 2-way RM ANOVA with as factors 'time' or 'frequency' and 'GT'. When GT or its  
860 interaction with time or frequency reached significance, post-hoc t-tests were computed. The  
861 above-mentioned analyses were all performed in Prism. Missing values in the sleep-wake transition

862 data of Figure 2-B led to exclusion of all data further away from the transition to perform a RM  
863 ANOVA.

864 Correlation coefficients of linear regression were calculated in Prism over all hourly values of  
865 LMA,  $T_{cx}$  and waking per genotype (96 per mice). To compare slopes of regression lines between  
866 genotypes, an ANCOVA was applied based on (Zar, 1984) and run in Prism. To quantify the  
867 contribution of waking and LMA independent from each other to  $T_{cx}$ , a partial correlation was  
868 performed (R software; package 'ppcor', function `pcor.test`). Mixed model analysis was performed  
869 with factors LMA ( $\log_2$  transformed), waking, and genotype (R packages 'lme4', 'lmer', 'lmerTest',  
870 and 'MuMIn'). Model<sub>1</sub> quantified the predictive power of waking, Model<sub>2</sub> of waking and LMA per  
871 unit of waking (LMA/Waking) and Model<sub>3</sub> of waking, LMA/Waking and its interaction, to predict  
872  $T_{cx}$ . Predictive power of models was compared with Chi-squared tests by assessing the statistical  
873 significance in the reduction of residual sum of squares between two models ordered by complexity;  
874 *i.e.* Model<sub>1</sub> was compared to Model<sub>2</sub>, and upon significance, Model<sub>2</sub> was compared to Model<sub>3</sub>.  
875 Goodness-of-fit was assessed by the marginal R-squared ( $R^2_m$ ) which explains the effect of the fixed  
876 factors only, and the conditional R-squared ( $R^2_c$ ), which considers the individual variance as well  
877 and is therefore more biological relevant. Hence, in the results section only the  $R^2_c$  values are  
878 reported.

879 For the molecular data, the qPCR NRQ values were  $\log_2$ -transformed to normalize the  
880 distribution. Genotype differences at ZT<sub>0</sub> were tested with a t-test. The effect of SD and genotype  
881 at ZT<sub>6</sub> was assessed by 2-way ANOVA with post-hoc Fisher LSD tests upon significance. One outlier  
882 (WT, cortex) in the *ext/com* ratio analyses was detected by the Grubbs outliers test ( $\alpha < 0.05$ ) and  
883 excluded.

884

885

886 **Supplementary File 1:**

887 sequences of the forward and reverse primer and probe used for the RT-qPCR

| GeneName                | FwdPrimer                | RevPrimer                  | Probe                            |
|-------------------------|--------------------------|----------------------------|----------------------------------|
| <i>Cirbp</i>            | AGGGTTCTCCAGAGGAGGAG     | CCGGCTGGCATAGTAGTCTC       | CGCTTTGAGTCCCGGAGTGGG            |
| <i>Clock</i>            | CGAGAAAGATGGACAAGTCTACTG | TCCAGTCTGTCTCGAATCTCA      | TGCGCAAACATAAAGAGACCACTGCA       |
| <i>Dbp</i>              | CGTGGAGGTGCTTAATGACCTTT  | CATGGCCTGGAATGCTTGA        | AACCTGATCCCGTGATCTCGC            |
| <i>Dusp4</i>            | GTTTCATGGAAGCCATCGAGT    | CCGCTTCTTCATCATCAGGT       | TCCCGATCAGCCACCCTCTGC            |
| <i>Eef1a</i>            | CCTGGCAAGCCCATGTGT       | TCATGTCACGAACAGCAAAGC      | TGAGAGCTTCTCTGACTACCCCTCACTTGGT  |
| <i>Gadph</i>            | TCCATGACAACCTTGGCATTG    | CAGTCTTCTGGGTGGCAGTGA      | AAGGGCTCATGACCACAGTCCATGC        |
| <i>Homer1a</i>          | GCATTGCCATTTCCACATAGG    | ATGAACTCCATATTTCCACCTTACTT | ACA5ATTSAAATT5AG5AATCATGA (*)    |
| <i>Hsf1</i>             | CAACAACATGGCTAGCTTCG     | CTCGGTGTCTCTCTCAGG         | TGAGCAGGGTGGCCTGGTCA             |
| <i>Hsp90b1</i>          | TGTACCCACATCTGCACCTC     | TTGGGCATCATATCATGGAA       | CGCCGCGTATTCATCACAGATGA          |
| <i>Hspa5/Bip</i>        | CACCTTGGAAATGACCCTTCG    | GTTTGCCCACTCCAATATC        | TGGCAAGAAGCTTGATGTCCTGCTGC       |
| <i>Npas2</i>            | AGGAAAGGACGCTGCTTCA      | CCAAGCTATGCCTCGAAGTG       | CCTGGCAACCCCGCAGTTCTTA           |
| <i>Per2</i>             | ATGCTCGCCATCCACAAGA      | GCGGAATCGAATGGGAGAAT       | ATCCTACAGGCCGGTGGACAGCC          |
| <i>Rbm3-long</i>        | TGATGCTGTCTTCAGGATGC     | GGCCCAACACAAGTAAAGGA       | TCAAGGATGAGGTAAGTATGCTATCCTTGAGC |
| <i>Rbm3-short</i>       | GGCTATGACCGCTACTCAGG     | CAGCAATTTGCAAGGACGAT       | TGAGATGGGGCATGCACACA             |
| <i>Nr1d1 / Rev-erba</i> | AGGGCACAAGCAACATTACC     | CAGGCGTGCACTCCATAGT        | AGGCCACGTCCCCACACACC             |
| <i>Sfpq</i>             | GCATTTGAAAGATGCAGTGAA    | CAGGAAGACCATCTTCGTCA       | TCGCCAGTCATTGTGGAACCA            |
| <i>Sfpq_Comm</i>        | TGGATGTTAGCAGTTTATTGACC  | GCACAAGGTACTGCCATT         | TGTAATGGCCTGTTGGGACGG            |
| <i>Sfpq_Ext</i>         | TGCTTCTCCACCATAAG        | TTGCTCTAACGAAAGGAAATTCA    | TGGGGATGTTTTGATGATGTCAGTTCA      |
| <i>Sirt1</i>            | TTGTGAAGCTGTTCTGTTGAG    | CTCATCAGCTGGGCACCTA        | TTTTAATCAGGTAGTTCTCGTGCCC        |
| <i>Tbp</i>              | TTGACCTAAAGACCATTGCACCTC | TTCTCATGATGACTGCAGCAA      | TGCAAGAAATGCTGAATATAATCCAAGCG    |

888

889

890

891

(\*) 5 = propynyl-dC ; increases the melting temperature of the probe

892



## 893 **References**

- 894 ADAMOVICH, Y., LADEUIX, B., GOLIK, M., KOENERS, M. P. & ASHER, G. 2017. Rhythmic Oxygen Levels  
895 Reset Circadian Clocks through HIF1alpha. *Cell Metab*, 25, 93-101.
- 896 ALFOLDI, P., RUBICSEK, G., CSERNI, G. & OBAL, F., JR. 1990. Brain and core temperatures and peripheral  
897 vasomotion during sleep and wakefulness at various ambient temperatures in the rat. *Pflugers*  
898 *Arch*, 417, 336-41.
- 899 ARCHER, S. N., LAING, E. E., MOLLER-LEVET, C. S., VAN DER VEEN, D. R., BUCCA, G., LAZAR, A. S., SANTHI,  
900 N., SLAK, A., KABILJO, R., VON SCHANTZ, M., SMITH, C. P. & DIJK, D. J. 2014. Mistimed sleep  
901 disrupts circadian regulation of the human transcriptome. *Proc Natl Acad Sci U S A*, 111, E682-  
902 91.
- 903 BAKER, F. C., ANGARA, C., SZYMUSIAK, R. & MCGINTY, D. 2005. Persistence of sleep-temperature  
904 coupling after suprachiasmatic nuclei lesions in rats. *Am J Physiol Regul Integr Comp Physiol*,  
905 289, R827-38.
- 906 BAKER, M. A. & HAYWARD, J. N. 1968. The influence of the nasal mucosa and the carotid rete upon  
907 hypothalamic temperature in sheep. *J Physiol*, 198, 561-79.
- 908 BARF, R. P., MEERLO, P. & SCHEURINK, A. J. 2010. Chronic sleep disturbance impairs glucose  
909 homeostasis in rats. *Int J Endocrinol*, 2010, 819414.
- 910 BOSMAN, C. A., LANSINK, C. S. & PENNARTZ, C. M. 2014. Functions of gamma-band synchronization in  
911 cognition: from single circuits to functional diversity across cortical and subcortical systems. *Eur*  
912 *J Neurosci*, 39, 1982-99.
- 913 BUZSÁKI, G. 2006. *Rhythms of the brain*, England, Oxford University Press.
- 914 CAMBRAS, T., WELLER, J. R., ANGLÉS-PUJORAS, M., LEE, M. L., CHRISTOPHER, A., DIEZ-NOGUERA, A.,  
915 KRUEGER, J. M. & DE LA IGLESIA, H. O. 2007. Circadian desynchronization of core body  
916 temperature and sleep stages in the rat. *Proc Natl Acad Sci U S A*, 104, 7634-9.
- 917 CHO, H., ZHAO, X., HATORI, M., YU, R. T., BARISH, G. D., LAM, M. T., CHONG, L. W., DITACCHIO, L.,  
918 ATKINS, A. R., GLASS, C. K., LIDDLE, C., AUWERX, J., DOWNES, M., PANDA, S. & EVANS, R. M.  
919 2012. Regulation of circadian behaviour and metabolism by REV-ERB-alpha and REV-ERB-beta.  
920 *Nature*, 485, 123-7.
- 921 CHO, K. K., HOCH, R., LEE, A. T., PATEL, T., RUBENSTEIN, J. L. & SOHAL, V. S. 2015. Gamma rhythms link  
922 prefrontal interneuron dysfunction with cognitive inflexibility in *Dlx5/6*(+/-) mice. *Neuron*, 85,  
923 1332-43.
- 924 COLGIN, L. L. 2015. Theta-gamma coupling in the entorhinal-hippocampal system. *Curr Opin Neurobiol*,  
925 31, 45-50.
- 926 COPINSCHI, G., LEPROULT, R. & SPIEGEL, K. 2014. The important role of sleep in metabolism. *Front Horm*  
927 *Res*, 42, 59-72.
- 928 DAAN, S., BEERSMA, D. G. & BORBELY, A. A. 1984. Timing of human sleep: recovery process gated by a  
929 circadian pacemaker. *Am J Physiol*, 246, R161-83.
- 930 DEBOER, T., FRANKEN, P. & TOBLER, I. 1994. Sleep and cortical temperature in the Djungarian hamster  
931 under baseline conditions and after sleep deprivation. *J Comp Physiol A*, 174, 145-55.
- 932 DELEZIE, J., DUMONT, S., DARDENTE, H., OUDART, H., GRECHEZ-CASSIAU, A., KLOSEN, P., TEBOUL, M.,  
933 DELAUNAY, F., PEVET, P. & CHALLET, E. 2012. The nuclear receptor REV-ERBalpha is required for  
934 the daily balance of carbohydrate and lipid metabolism. *Faseb j*, 26, 3321-35.
- 935 DIESSLER, S., JAN, M., EMMENEGGER, Y., GUEX, N., MIDDLETON, B., SKENE, D. J., IBBERSON, M.,  
936 BURDET, F., GOTZ, L., PAGNI, M., SANKAR, M., LIECHTI, R., HOR, C. N., XENARIOS, I. & FRANKEN,

- 937 P. 2018. A systems genetics resource and analysis of sleep regulation in the mouse. *PLoS Biol*,  
938 16, e2005750.
- 939 DIJK, D. J. & CZEISLER, C. A. 1995. Contribution of the circadian pacemaker and the sleep homeostat to  
940 sleep propensity, sleep structure, electroencephalographic slow waves, and sleep spindle  
941 activity in humans. *J Neurosci*, 15, 3526-38.
- 942 DIJK, D. J., DUFFY, J. F. & CZEISLER, C. A. 2000. Contribution of circadian physiology and sleep  
943 homeostasis to age-related changes in human sleep. *Chronobiol Int*, 17, 285-311.
- 944 EDGAR, D. M., DEMENT, W. C. & FULLER, C. A. 1993. Effect of SCN lesions on sleep in squirrel monkeys:  
945 evidence for opponent processes in sleep-wake regulation. *J Neurosci*, 13, 1065-79.
- 946 FRANKEN, P. 2002. Long-term vs. short-term processes regulating REM sleep. *J Sleep Res*, 11, 17-28.
- 947 FRANKEN, P. 2013. A role for clock genes in sleep homeostasis. *Curr Opin Neurobiol*, 23, 864-72.
- 948 FRANKEN, P., CHOLLET, D. & TAFTI, M. 2001. The homeostatic regulation of sleep need is under genetic  
949 control. *J Neurosci*, 21, 2610-21.
- 950 FRANKEN, P., DUDLEY, C. A., ESTILL, S. J., BARAKAT, M., THOMASON, R., O'HARA, B. F. & MCKNIGHT, S. L.  
951 2006. NPAS2 as a transcriptional regulator of non-rapid eye movement sleep: genotype and sex  
952 interactions. *Proc Natl Acad Sci U S A*, 103, 7118-23.
- 953 FRANKEN, P., LOPEZ-MOLINA, L., MARCACCI, L., SCHIBLER, U. & TAFTI, M. 2000. The transcription factor  
954 DBP affects circadian sleep consolidation and rhythmic EEG activity. *J Neurosci*, 20, 617-25.
- 955 FRANKEN, P., MALAFOSE, A. & TAFTI, M. 1999. Genetic determinants of sleep regulation in inbred mice.  
956 *Sleep*, 22, 155-69.
- 957 FRANKEN, P., TOBLER, I. & BORBELY, A. A. 1992. Sleep and waking have a major effect on the 24-hr  
958 rhythm of cortical temperature in the rat. *J Biol Rhythms*, 7, 341-52.
- 959 FULLER, A., CARTER, R. N. & MITCHELL, D. 1998. Brain and abdominal temperatures at fatigue in rats  
960 exercising in the heat. *J Appl Physiol (1985)*, 84, 877-83.
- 961 FURTH, K. E., MCCOY, A. J., DODGE, C., WALTERS, J. R., BUONANNO, A. & DELAVILLE, C. 2017. Neuronal  
962 correlates of ketamine and walking induced gamma oscillations in the medial prefrontal cortex  
963 and mediodorsal thalamus. *PLoS One*, 12, e0186732.
- 964 HASAN, S., VAN DER VEEN, D. R., WINSKY-SOMMERER, R., DIJK, D. J. & ARCHER, S. N. 2011. Altered sleep  
965 and behavioral activity phenotypes in PER3-deficient mice. *Am J Physiol Regul Integr Comp*  
966 *Physiol*, 301, R1821-30.
- 967 HAYWARD, J. N. & BAKER, M. A. 1968. Role of cerebral arterial blood in the regulation of brain  
968 temperature in the monkey. *Am J Physiol*, 215, 389-403.
- 969 HELLEMANS, J., MORTIER, G., DE PAEPE, A., SPELEMAN, F. & VANDESOMPELE, J. 2007. qBase relative  
970 quantification framework and software for management and automated analysis of real-time  
971 quantitative PCR data. *Genome Biol*, 8, R19.
- 972 HIDDINGA, A. E., BEERSMA, D. G. & VAN DEN HOOFDACKER, R. H. 1997. Endogenous and exogenous  
973 components in the circadian variation of core body temperature in humans. *J Sleep Res*, 6, 156-  
974 63.
- 975 JEEWAJEE, A., BARRY, C., O'KEEFE, J. & BURGESS, N. 2008. Grid cells and theta as oscillatory  
976 interference: electrophysiological data from freely moving rats. *Hippocampus*, 18, 1175-85.
- 977 JUNG, C. M., MELANSON, E. L., FRYDENDALL, E. J., PERREAULT, L., ECKEL, R. H. & WRIGHT, K. P. 2011.  
978 Energy expenditure during sleep, sleep deprivation and sleep following sleep deprivation in  
979 adult humans. *J Physiol*, 589, 235-44.

- 980 KARLSSON, B., KNUTSSON, A. & LINDAHL, B. 2001. Is there an association between shift work and having  
981 a metabolic syndrome? Results from a population based study of 27,485 people. *Occup Environ*  
982 *Med*, 58, 747-52.
- 983 LEYS, C., LEY, C., KLEIN, O., BERNARD, P. & LICATA, L. 2013. Detecting outliers: Do not use standard  
984 deviation around the mean, use absolute deviation around the median. *Journal of Experimental*  
985 *Social Psychology*, 49, 764-766.
- 986 LIU, Y., HU, W., MURAKAWA, Y., YIN, J., WANG, G., LANDTHALER, M. & YAN, J. 2013. Cold-induced RNA-  
987 binding proteins regulate circadian gene expression by controlling alternative polyadenylation.  
988 *Sci Rep*, 3, 2054.
- 989 LOWREY, P. L. & TAKAHASHI, J. S. 2011. Genetics of circadian rhythms in Mammalian model organisms.  
990 *Adv Genet*, 74, 175-230.
- 991 MANG, G. M. & FRANKEN, P. 2012. Sleep and EEG Phenotyping in Mice. *Curr Protoc Mouse Biol*, 2, 55-  
992 74.
- 993 MANG, G. M. & FRANKEN, P. 2015. Genetic dissection of sleep homeostasis. *Curr Top Behav Neurosci*,  
994 25, 25-63.
- 995 MANG, G. M., LA SPADA, F., EMMENEGGER, Y., CHAPPUIS, S., RIPPERGER, J. A., ALBRECHT, U. &  
996 FRANKEN, P. 2016. Altered Sleep Homeostasis in Rev-erbalpha Knockout Mice. *Sleep*, 39, 589-  
997 601.
- 998 MARET, S., DORSAZ, S., GURCEL, L., PRADERVAND, S., PETIT, B., PFISTER, C., HAGENBUCHLE, O., O'HARA,  
999 B. F., FRANKEN, P. & TAFTI, M. 2007. Homer1a is a core brain molecular correlate of sleep loss.  
1000 *Proc Natl Acad Sci U S A*, 104, 20090-5.
- 1001 MASUDA, T., ITOH, K., HIGASHITSUJI, H., HIGASHITSUJI, H., NAKAZAWA, N., SAKURAI, T., LIU, Y.,  
1002 TOKUCHI, H., FUJITA, T., ZHAO, Y., NISHIYAMA, H., TANAKA, T., FUKUMOTO, M., IKAWA, M.,  
1003 OKABE, M. & FUJITA, J. 2012. Cold-inducible RNA-binding protein (Cirp) interacts with  
1004 Dyrk1b/Mirk and promotes proliferation of immature male germ cells in mice. *Proc Natl Acad Sci*  
1005 *U S A*, 109, 10885-90.
- 1006 MONGRAIN, V., HERNANDEZ, S. A., PRADERVAND, S., DORSAZ, S., CURIE, T., HAGIWARA, G., GIP, P.,  
1007 HELLER, H. C. & FRANKEN, P. 2010. Separating the contribution of glucocorticoids and  
1008 wakefulness to the molecular and electrophysiological correlates of sleep homeostasis. *Sleep*,  
1009 33, 1147-57.
- 1010 MORF, J., REY, G., SCHNEIDER, K., STRATMANN, M., FUJITA, J., NAEF, F. & SCHIBLER, U. 2012. Cold-  
1011 inducible RNA-binding protein modulates circadian gene expression posttranscriptionally.  
1012 *Science*, 338, 379-83.
- 1013 MUSIEK, E. S. & HOLTZMAN, D. M. 2016. Mechanisms linking circadian clocks, sleep, and  
1014 neurodegeneration. *Science*, 354, 1004-1008.
- 1015 NAYLOR, E., BERGMANN, B. M., KRAUSKI, K., ZEE, P. C., TAKAHASHI, J. S., VITATERNA, M. H. & TUREK, F.  
1016 W. 2000. The circadian clock mutation alters sleep homeostasis in the mouse. *J Neurosci*, 20,  
1017 8138-43.
- 1018 NIELL, C. M. & STRYKER, M. P. 2010. Modulation of visual responses by behavioral state in mouse visual  
1019 cortex. *Neuron*, 65, 472-9.
- 1020 NISHIYAMA, H., ITOH, K., KANEKO, Y., KISHISHITA, M., YOSHIDA, O. & FUJITA, J. 1997. A glycine-rich RNA-  
1021 binding protein mediating cold-inducible suppression of mammalian cell growth. *J Cell Biol*, 137,  
1022 899-908.
- 1023 NYBO, L., SECHER, N. H. & NIELSEN, B. 2002. Inadequate heat release from the human brain during  
1024 prolonged exercise with hyperthermia. *J Physiol*, 545, 697-704.

- 1025 PANDA, S. 2016. Circadian physiology of metabolism. *Science*, 354, 1008-1015.
- 1026 PREITNER, N., DAMIOLA, F., LOPEZ-MOLINA, L., ZAKANY, J., DUBOULE, D., ALBRECHT, U. & SCHIBLER, U.  
1027 2002. The orphan nuclear receptor REV-ERB $\alpha$  controls circadian transcription within the  
1028 positive limb of the mammalian circadian oscillator. *Cell*, 110, 251-60.
- 1029 REINKE, H., SAINI, C., FLEURY-OLELA, F., DIBNER, C., BENJAMIN, I. J. & SCHIBLER, U. 2008. Differential  
1030 display of DNA-binding proteins reveals heat-shock factor 1 as a circadian transcription factor.  
1031 *Genes Dev*, 22, 331-45.
- 1032 RUDIC, R. D., MCNAMARA, P., CURTIS, A. M., BOSTON, R. C., PANDA, S., HOGENESCH, J. B. &  
1033 FITZGERALD, G. A. 2004. BMAL1 and CLOCK, two essential components of the circadian clock,  
1034 are involved in glucose homeostasis. *PLoS Biol*, 2, e377.
- 1035 SCHIBLER, U., GOTIC, I., SAINI, C., GOS, P., CURIE, T., EMMENEGGER, Y., SINTUREL, F., GOSSELIN, P.,  
1036 GERBER, A., FLEURY-OLELA, F., RANDO, G., DEMARQUE, M. & FRANKEN, P. 2015. Clock-Talk:  
1037 Interactions between Central and Peripheral Circadian Oscillators in Mammals. *Cold Spring Harb*  
1038 *Symp Quant Biol*, 80, 223-32.
- 1039 SHAW, P. J., TONONI, G., GREENSPAN, R. J. & ROBINSON, D. F. 2002. Stress response genes protect  
1040 against lethal effects of sleep deprivation in *Drosophila*. *Nature*, 417, 287-91.
- 1041 SOLT, L. A., WANG, Y., BANERJEE, S., HUGHES, T., KOJETIN, D. J., LUNDASEN, T., SHIN, Y., LIU, J.,  
1042 CAMERON, M. D., NOEL, R., YOO, S. H., TAKAHASHI, J. S., BUTLER, A. A., KAMENECKA, T. M. &  
1043 BURRIS, T. P. 2012. Regulation of circadian behaviour and metabolism by synthetic REV-ERB  
1044 agonists. *Nature*, 485, 62-8.
- 1045 SUTTON, B. C. & OPP, M. R. 2014. Sleep fragmentation exacerbates mechanical hypersensitivity and  
1046 alters subsequent sleep-wake behavior in a mouse model of musculoskeletal sensitization.  
1047 *Sleep*, 37, 515-24.
- 1048 TAMARU, T., HATTORI, M., HONDA, K., BENJAMIN, I., OZAWA, T. & TAKAMATSU, K. 2011.  
1049 Synchronization of circadian Per2 rhythms and HSF1-BMAL1:CLOCK interaction in mouse  
1050 fibroblasts after short-term heat shock pulse. *PLoS One*, 6, e24521.
- 1051 VASSALLI, A. & FRANKEN, P. 2017. Hypocretin (orexin) is critical in sustaining theta/gamma-rich waking  
1052 behaviors that drive sleep need. *Proc Natl Acad Sci U S A*, 114, E5464-E5473.
- 1053 VINCK, M., BATISTA-BRITO, R., KNOBLICH, U. & CARDIN, J. A. 2015. Arousal and locomotion make  
1054 distinct contributions to cortical activity patterns and visual encoding. *Neuron*, 86, 740-54.
- 1055 VIOLA, A. U., ARCHER, S. N., JAMES, L. M., GROEGER, J. A., LO, J. C., SKENE, D. J., VON SCHANTZ, M. &  
1056 DIJK, D. J. 2007. PER3 polymorphism predicts sleep structure and waking performance. *Curr Biol*,  
1057 17, 613-8.
- 1058 WANG, H., LIU, Y., BRIESEMANN, M. & YAN, J. 2010. Computational analysis of gene regulation in animal  
1059 sleep deprivation. *Physiol Genomics*, 42, 427-36.
- 1060 WEVER, R. A. 1979. *The Circadian System of Man*, New York, Springer-Verlag.
- 1061 WISOR, J. P., O'HARA, B. F., TERAQ, A., SELBY, C. P., KILDUFF, T. S., SANCAR, A., EDGAR, D. M. &  
1062 FRANKEN, P. 2002. A role for cryptochromes in sleep regulation. *BMC Neurosci*, 3, 20.
- 1063 WISOR, J. P., PASUMARTHI, R. K., GERASHCHENKO, D., THOMPSON, C. L., PATHAK, S., SANCAR, A.,  
1064 FRANKEN, P., LEIN, E. S. & KILDUFF, T. S. 2008. Sleep deprivation effects on circadian clock gene  
1065 expression in the cerebral cortex parallel electroencephalographic differences among mouse  
1066 strains. *J Neurosci*, 28, 7193-201.
- 1067 ZAR, J. H. 1984. *Biostatistical Analysis* Prentice Hall.

1068 ZHENG, C., BIERI, K. W., TRETTEL, S. G. & COLGIN, L. L. 2015. The relationship between gamma frequency  
1069 and running speed differs for slow and fast gamma rhythms in freely behaving rats.  
1070 *Hippocampus*, 25, 924-38.  
1071

# *Cirbp*

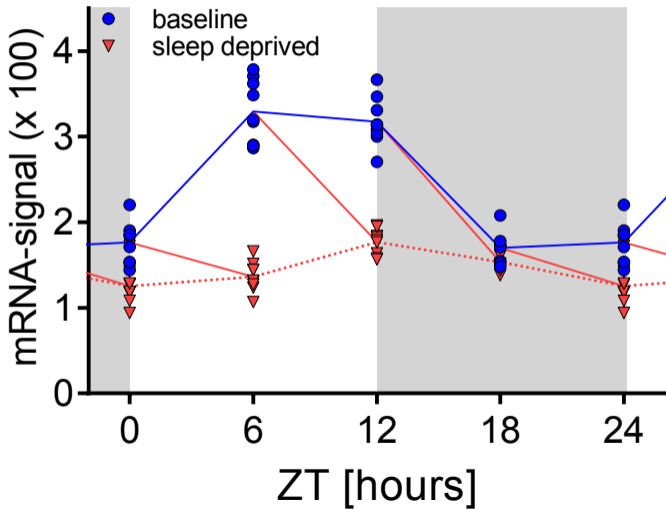

**A**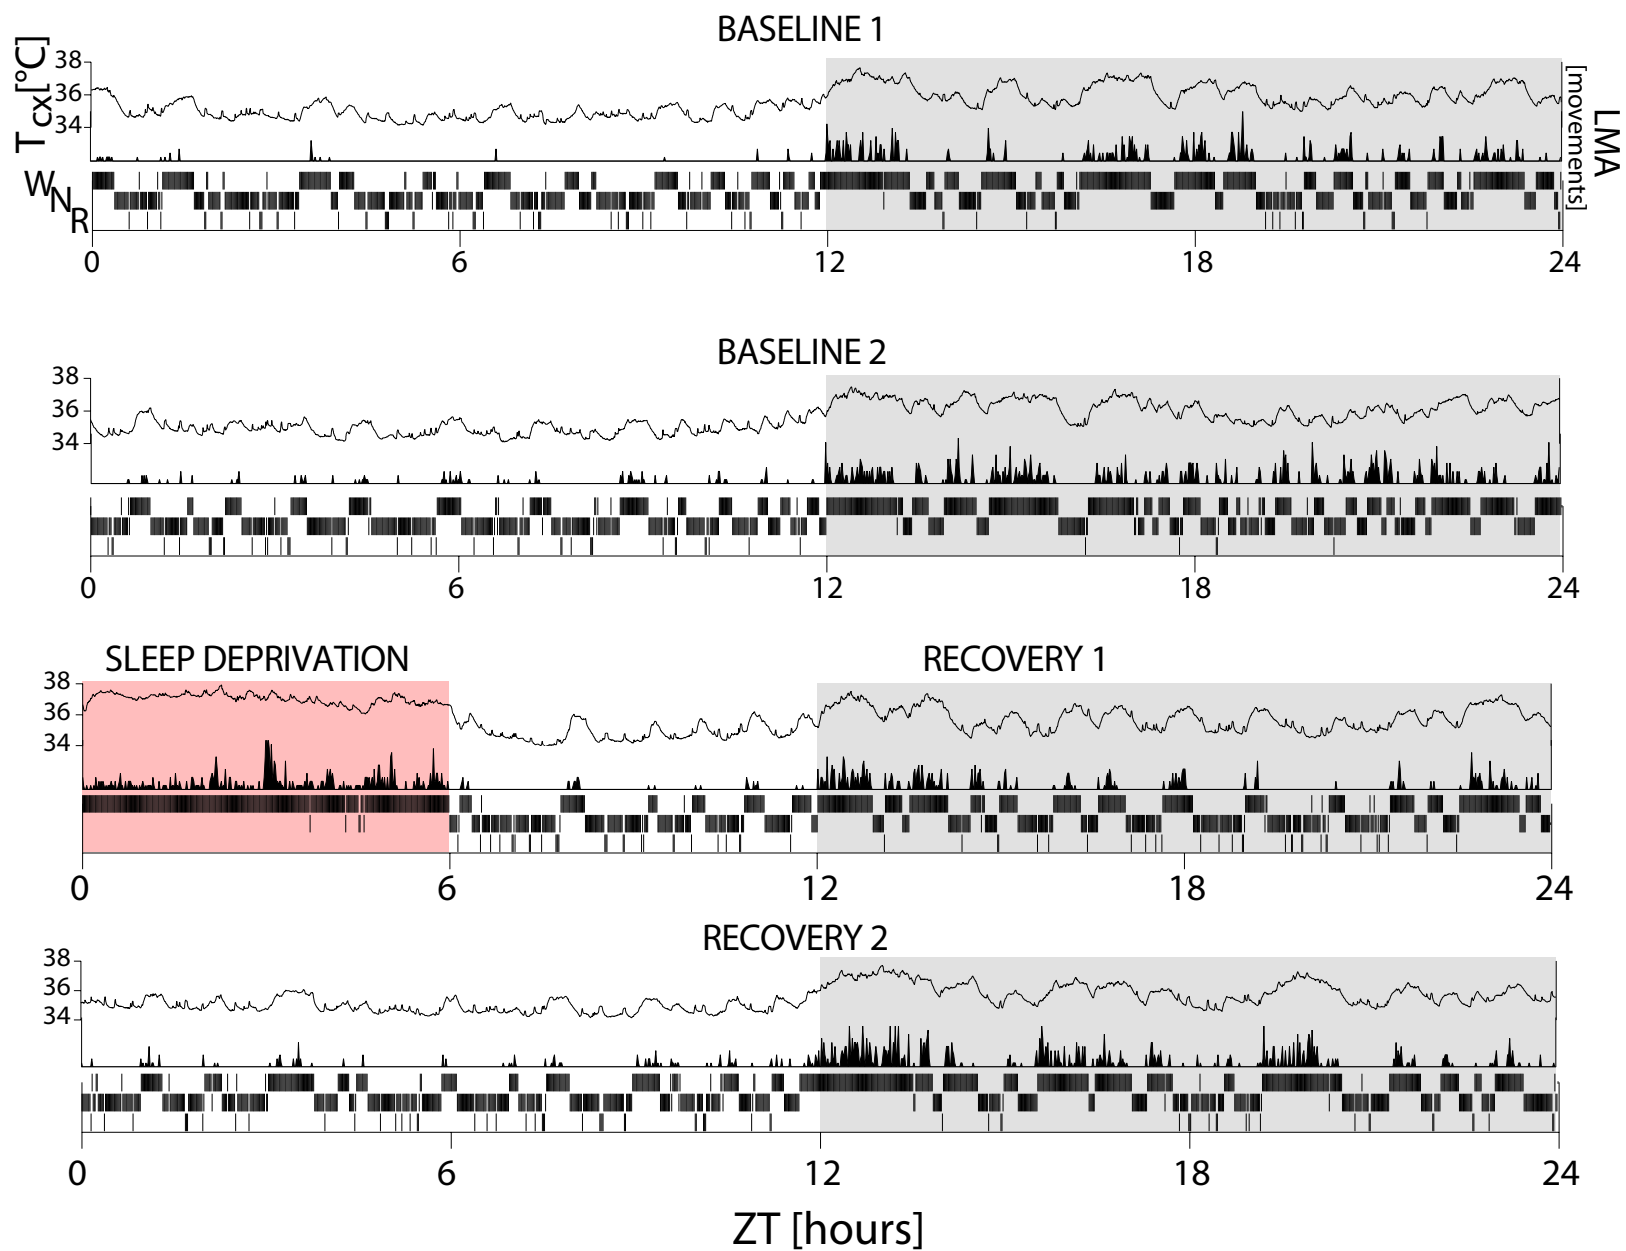**B**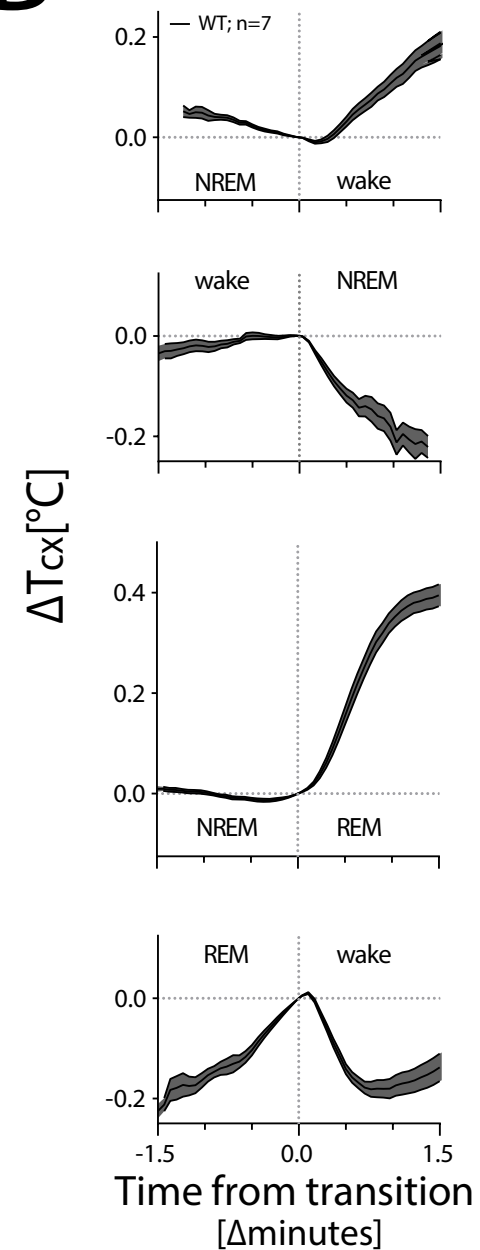

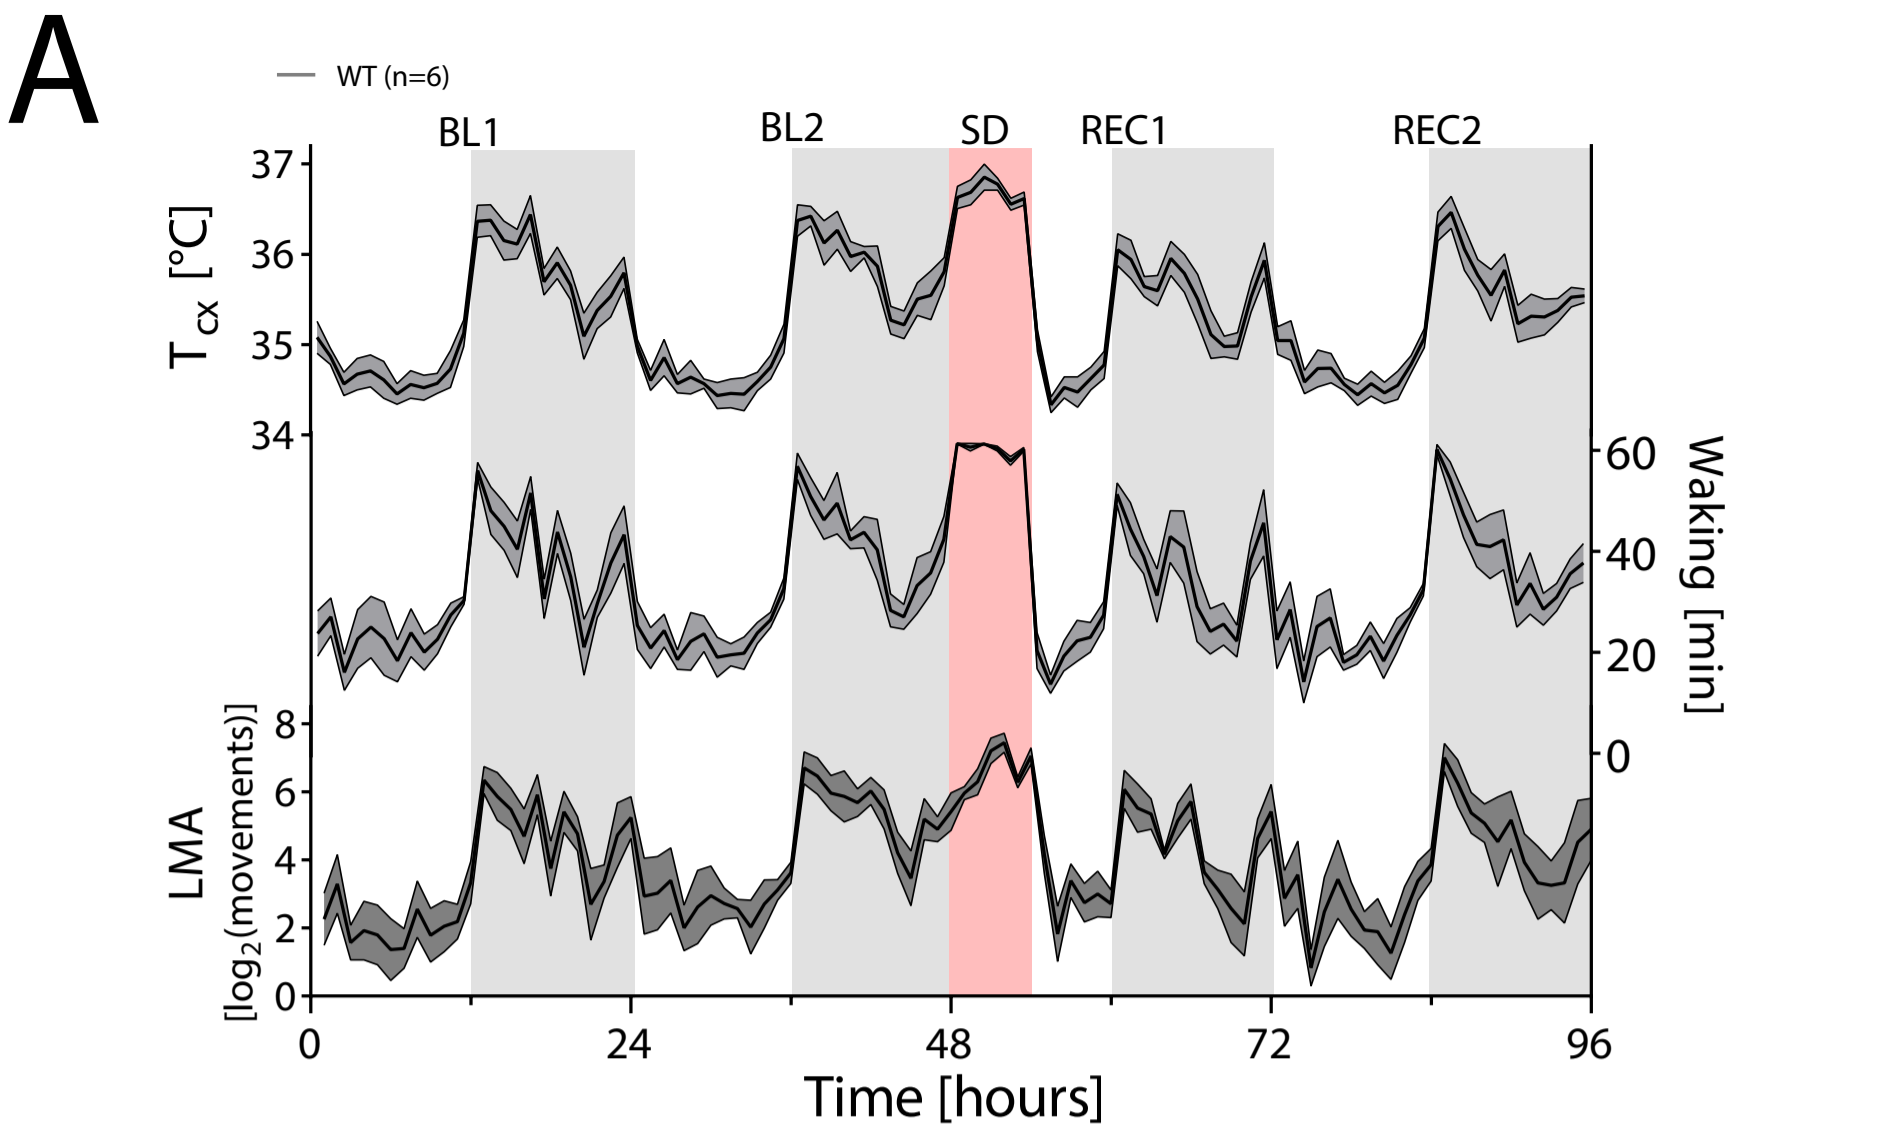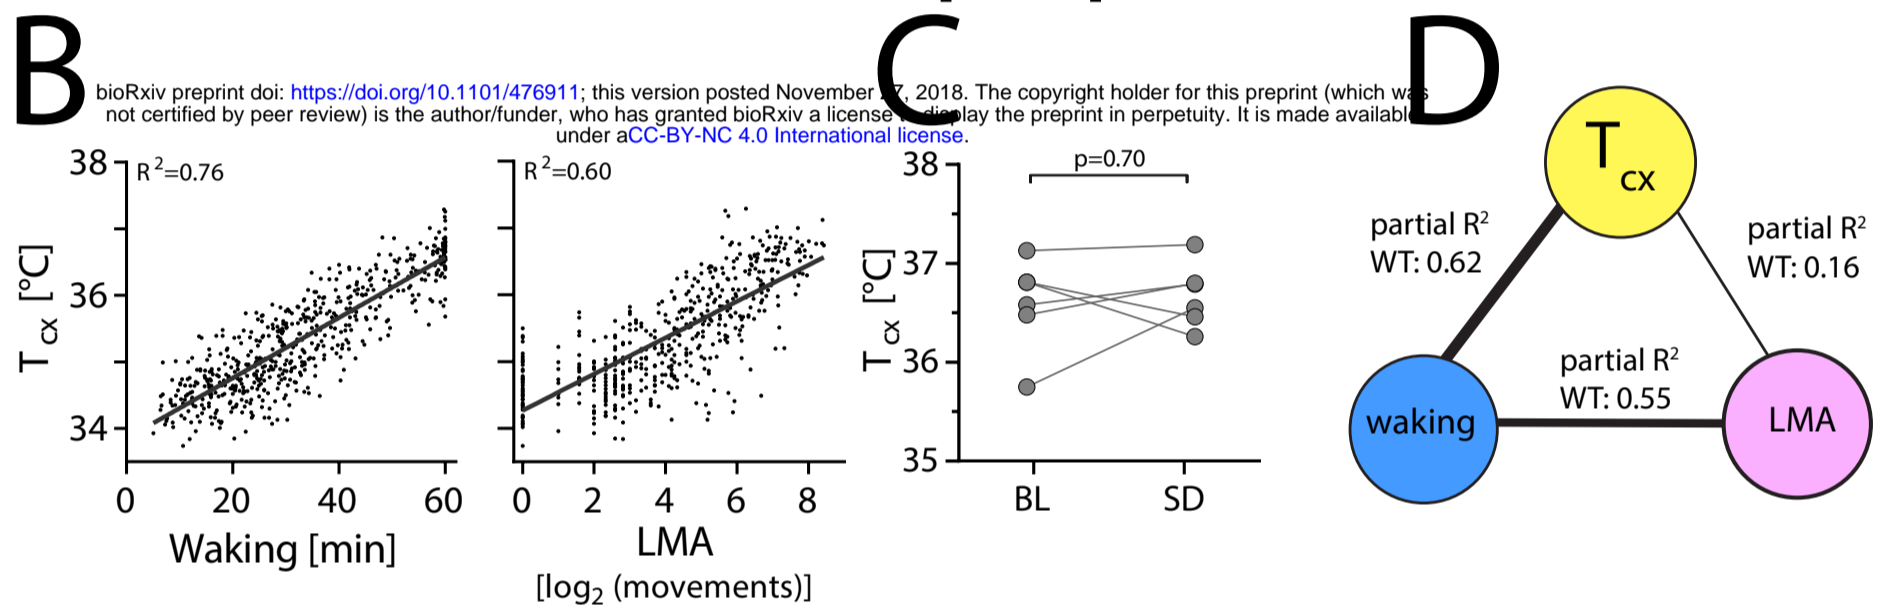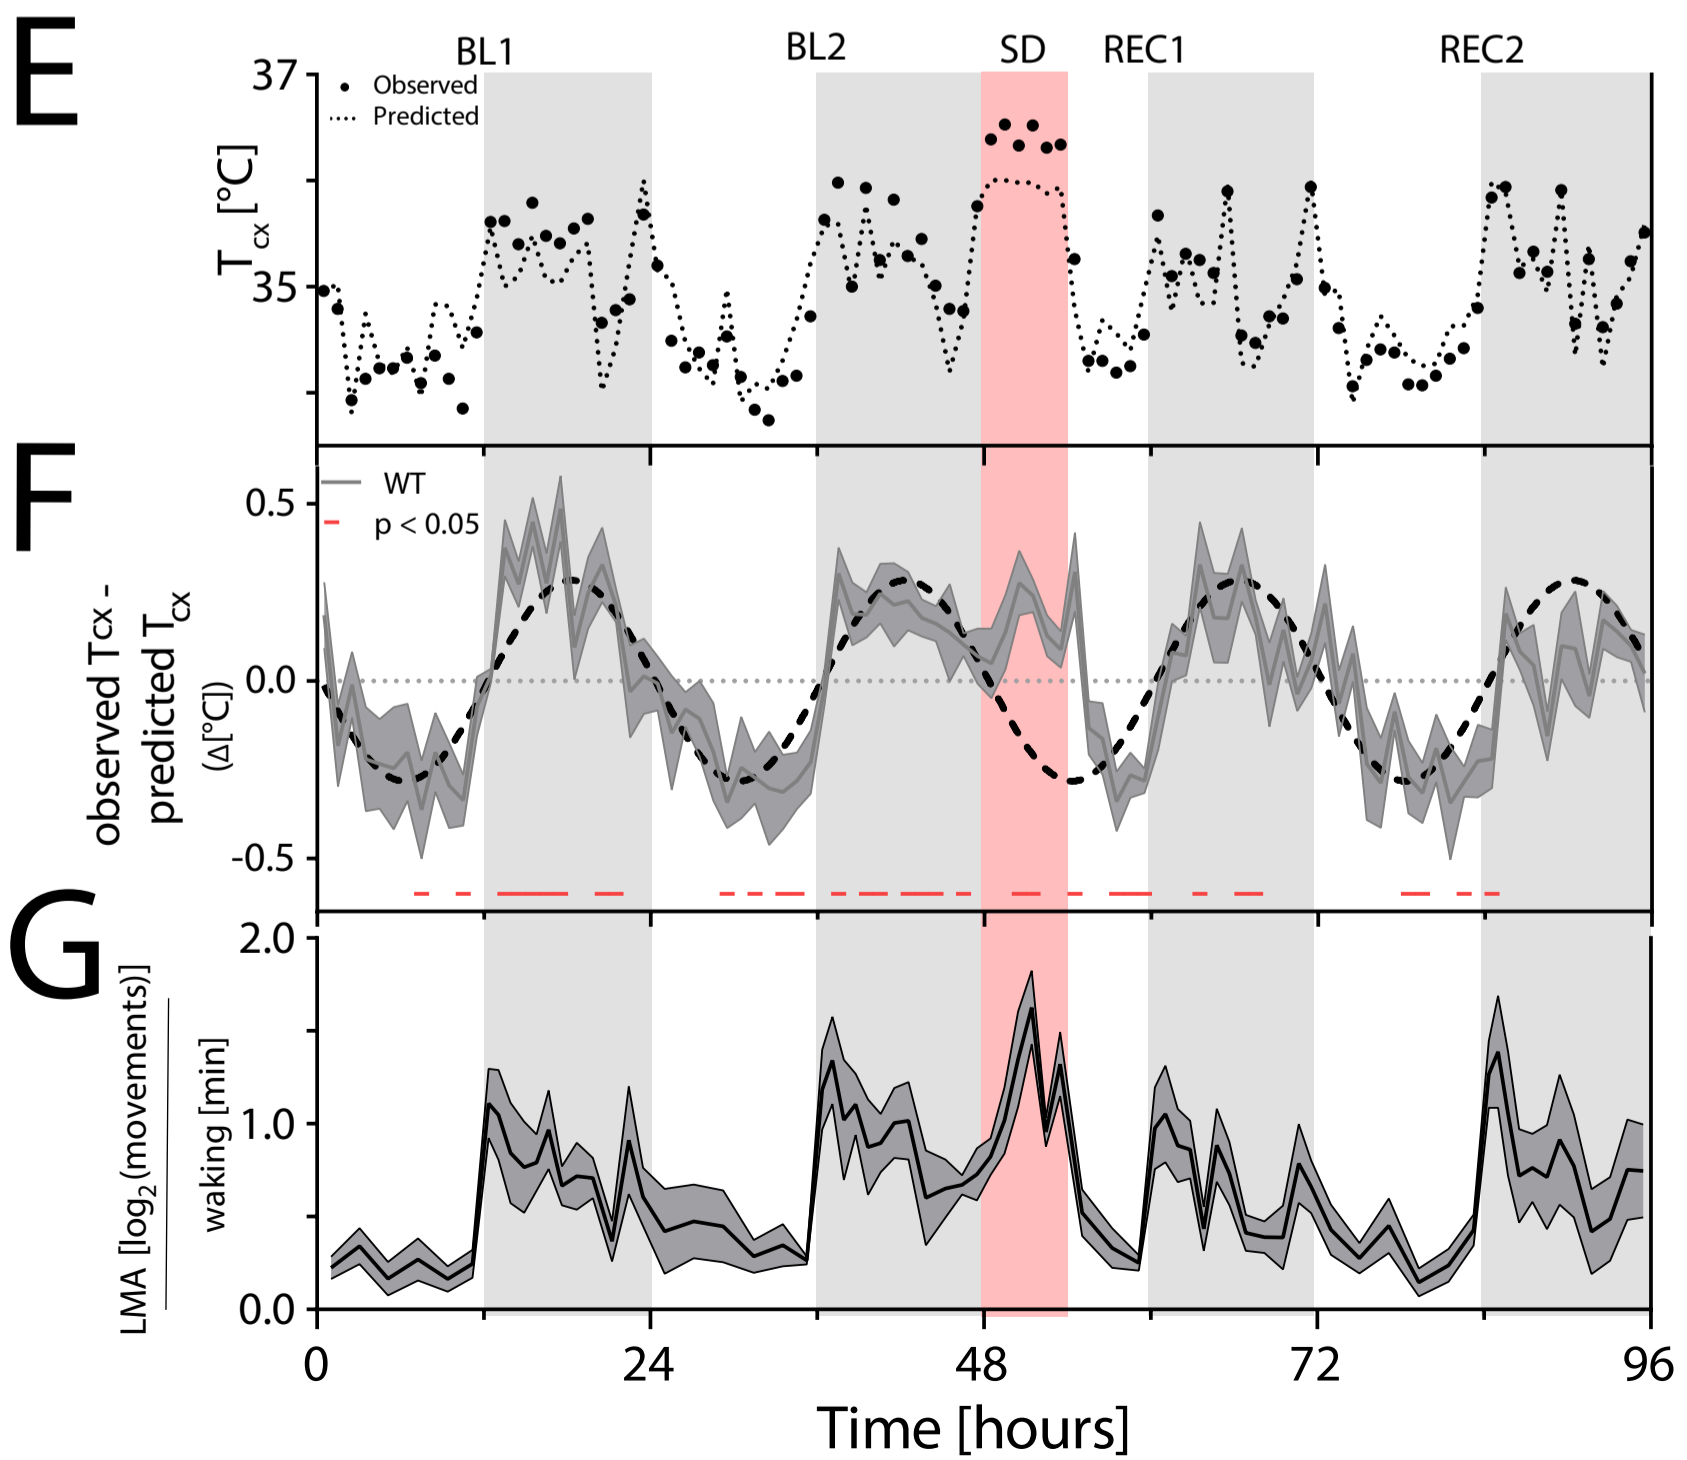



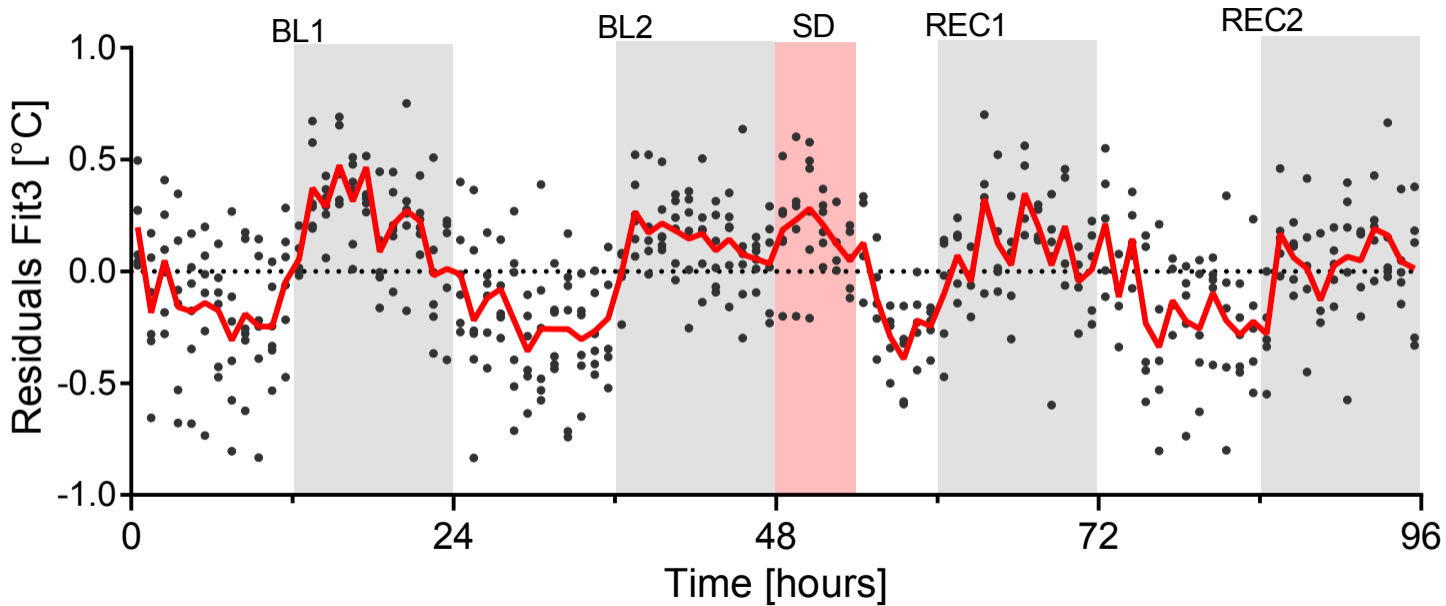

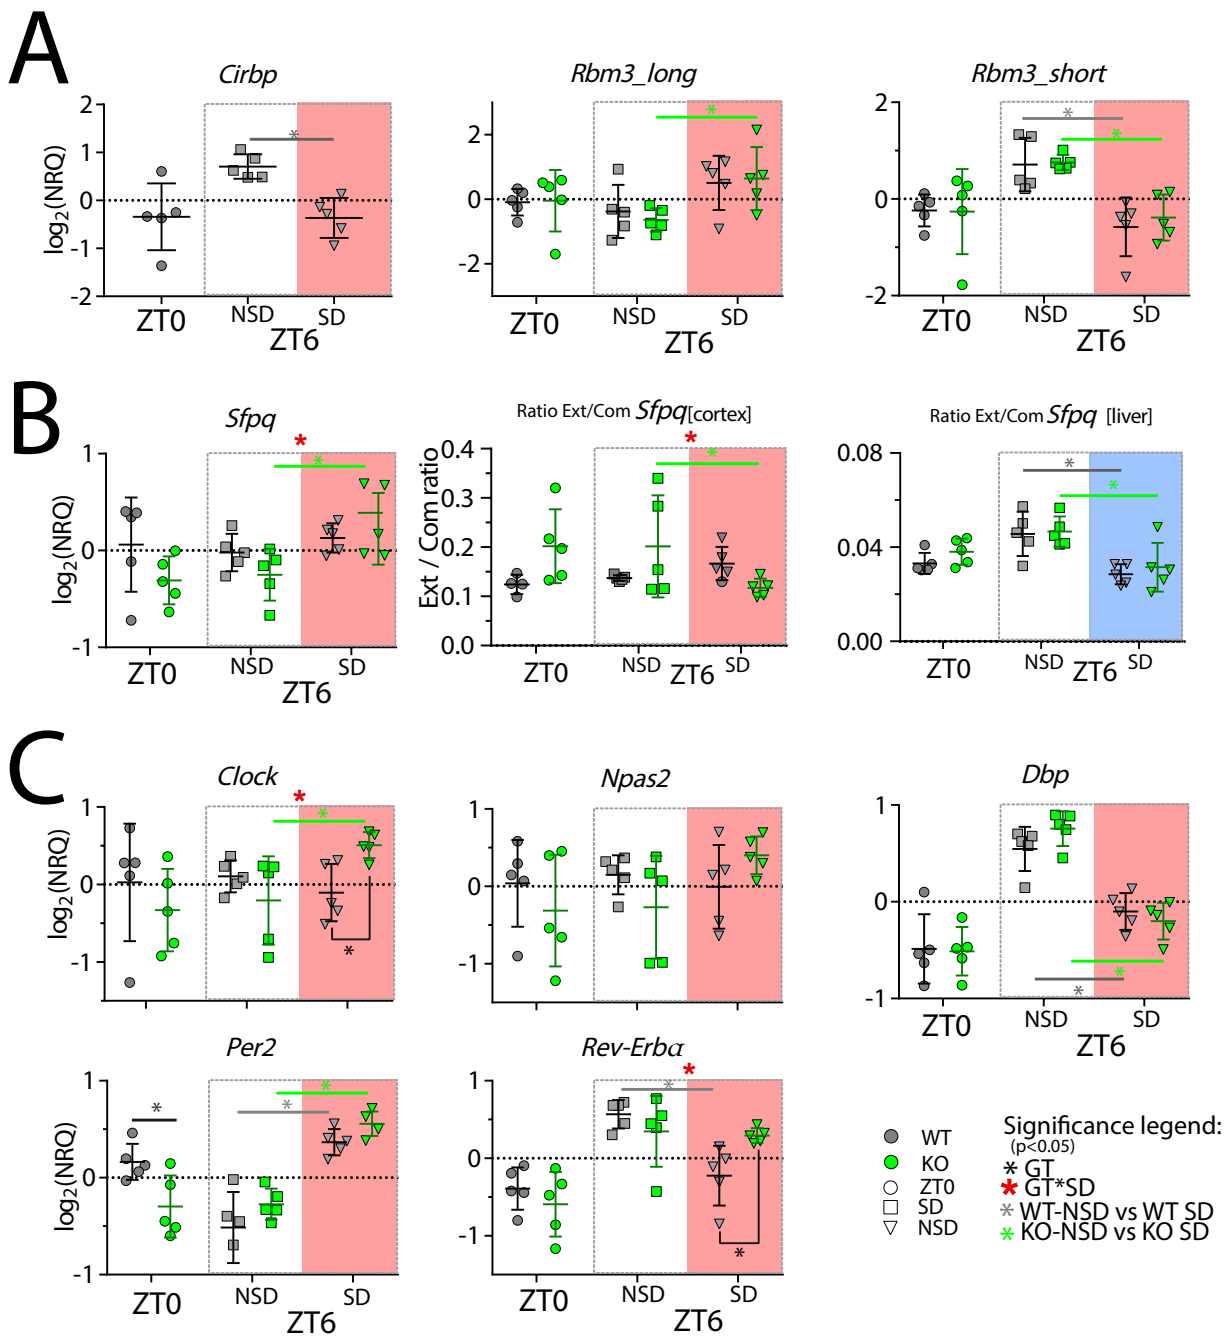

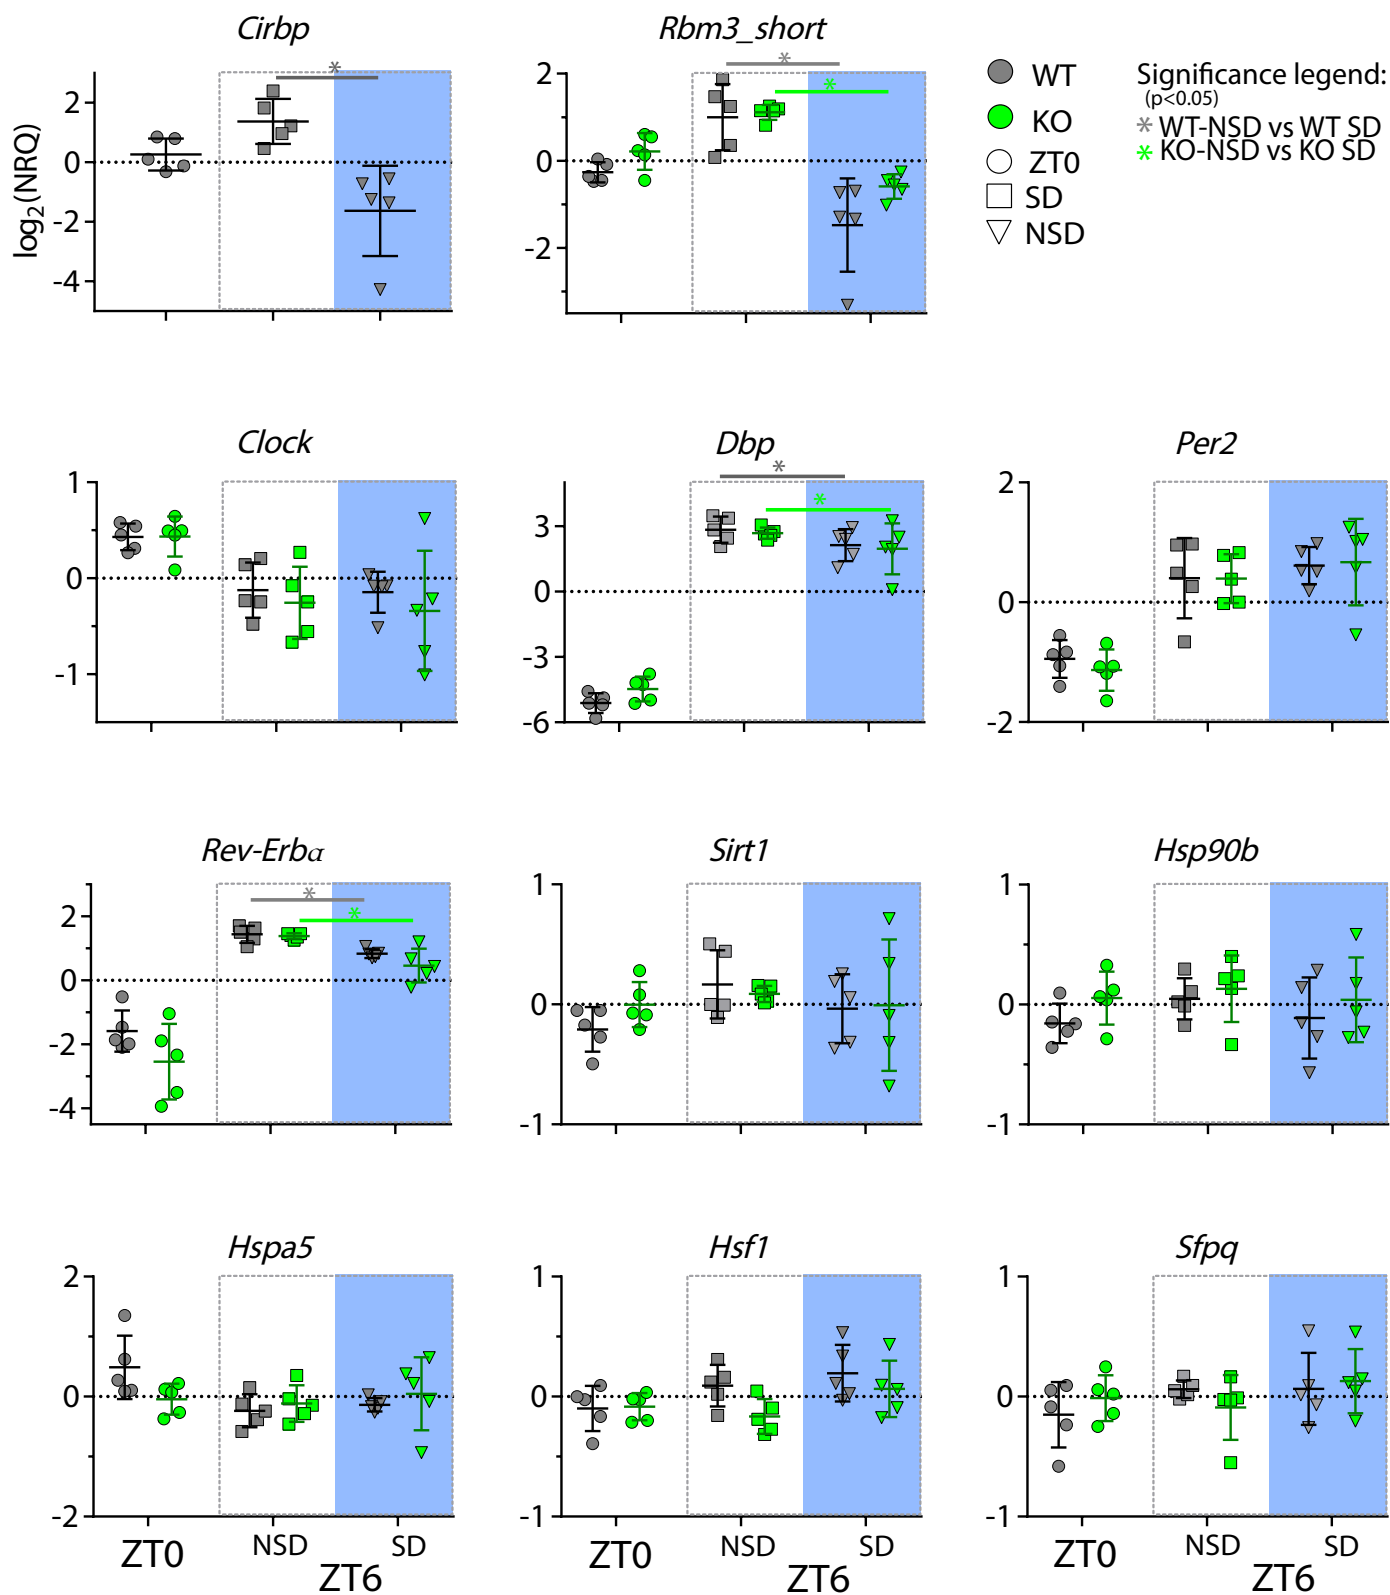

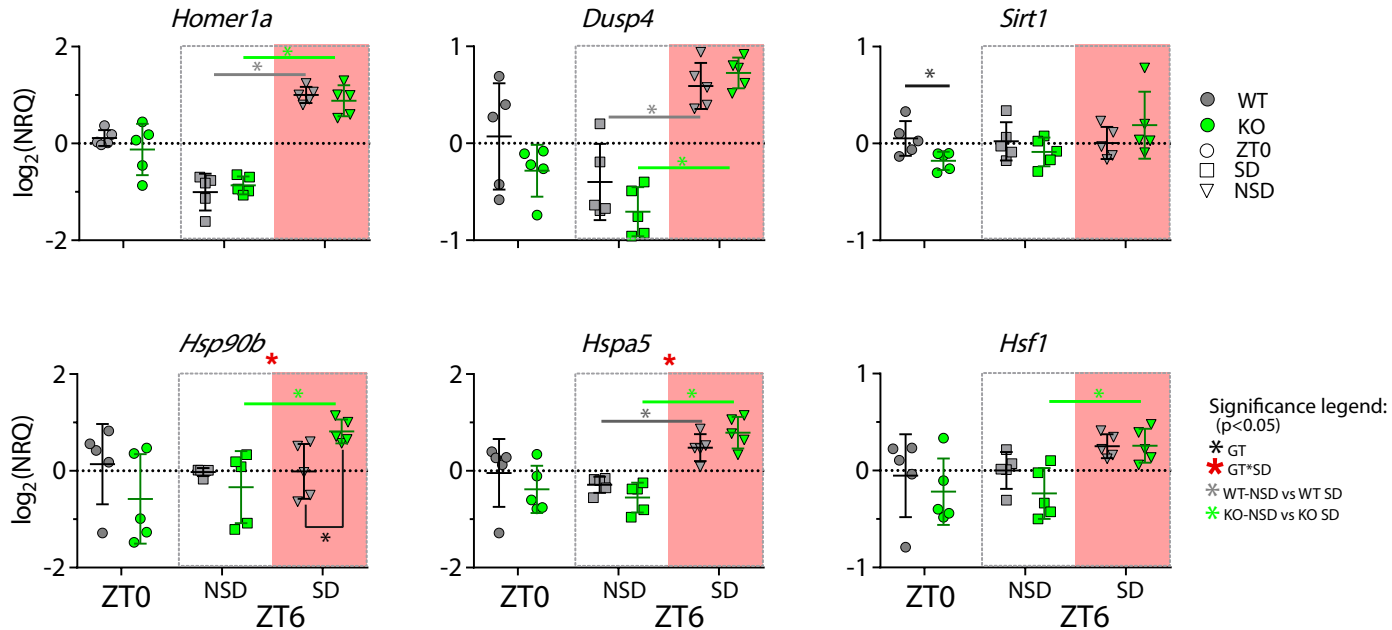

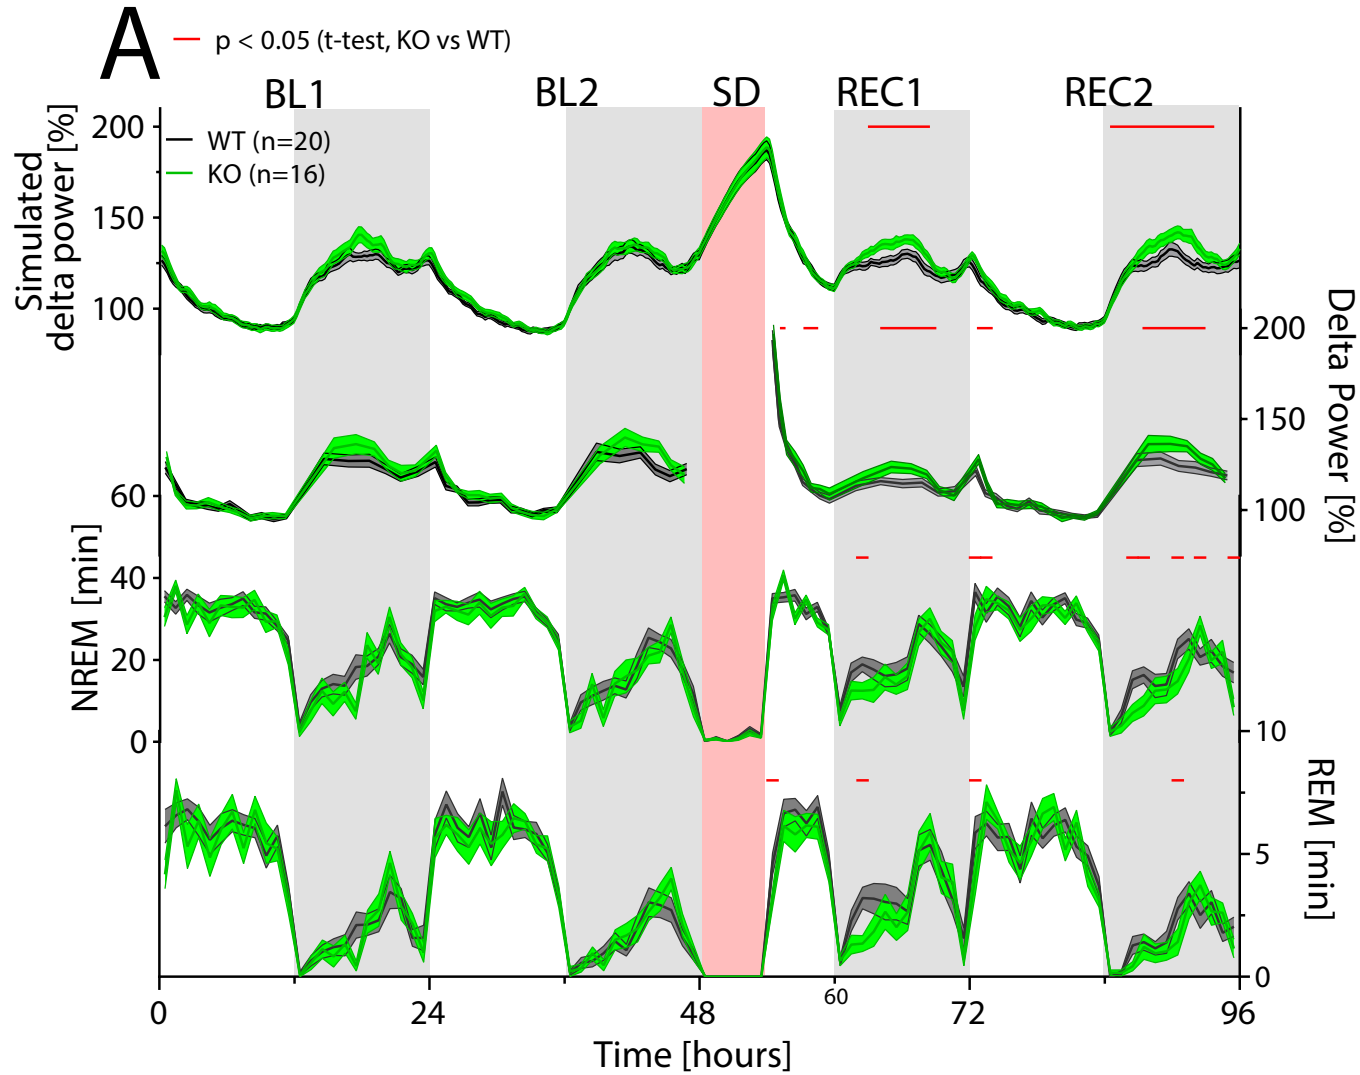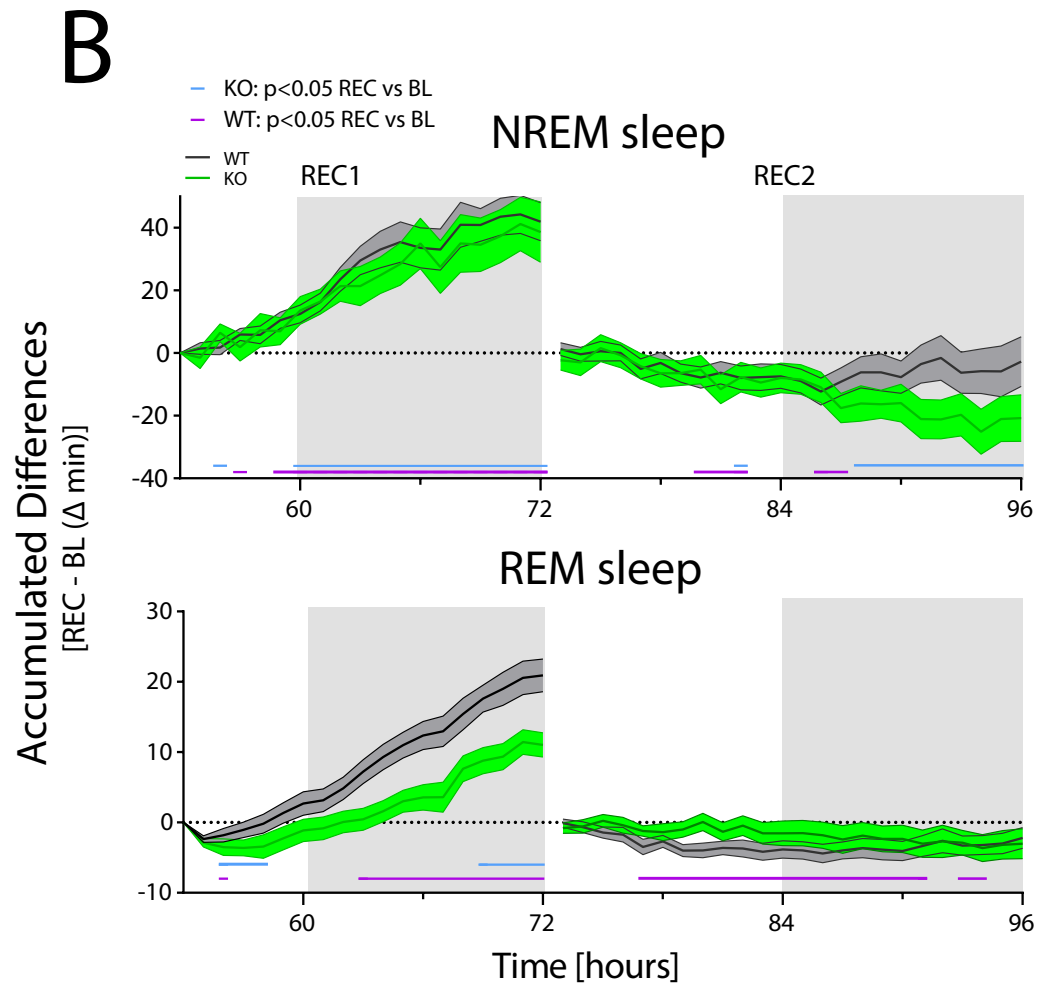

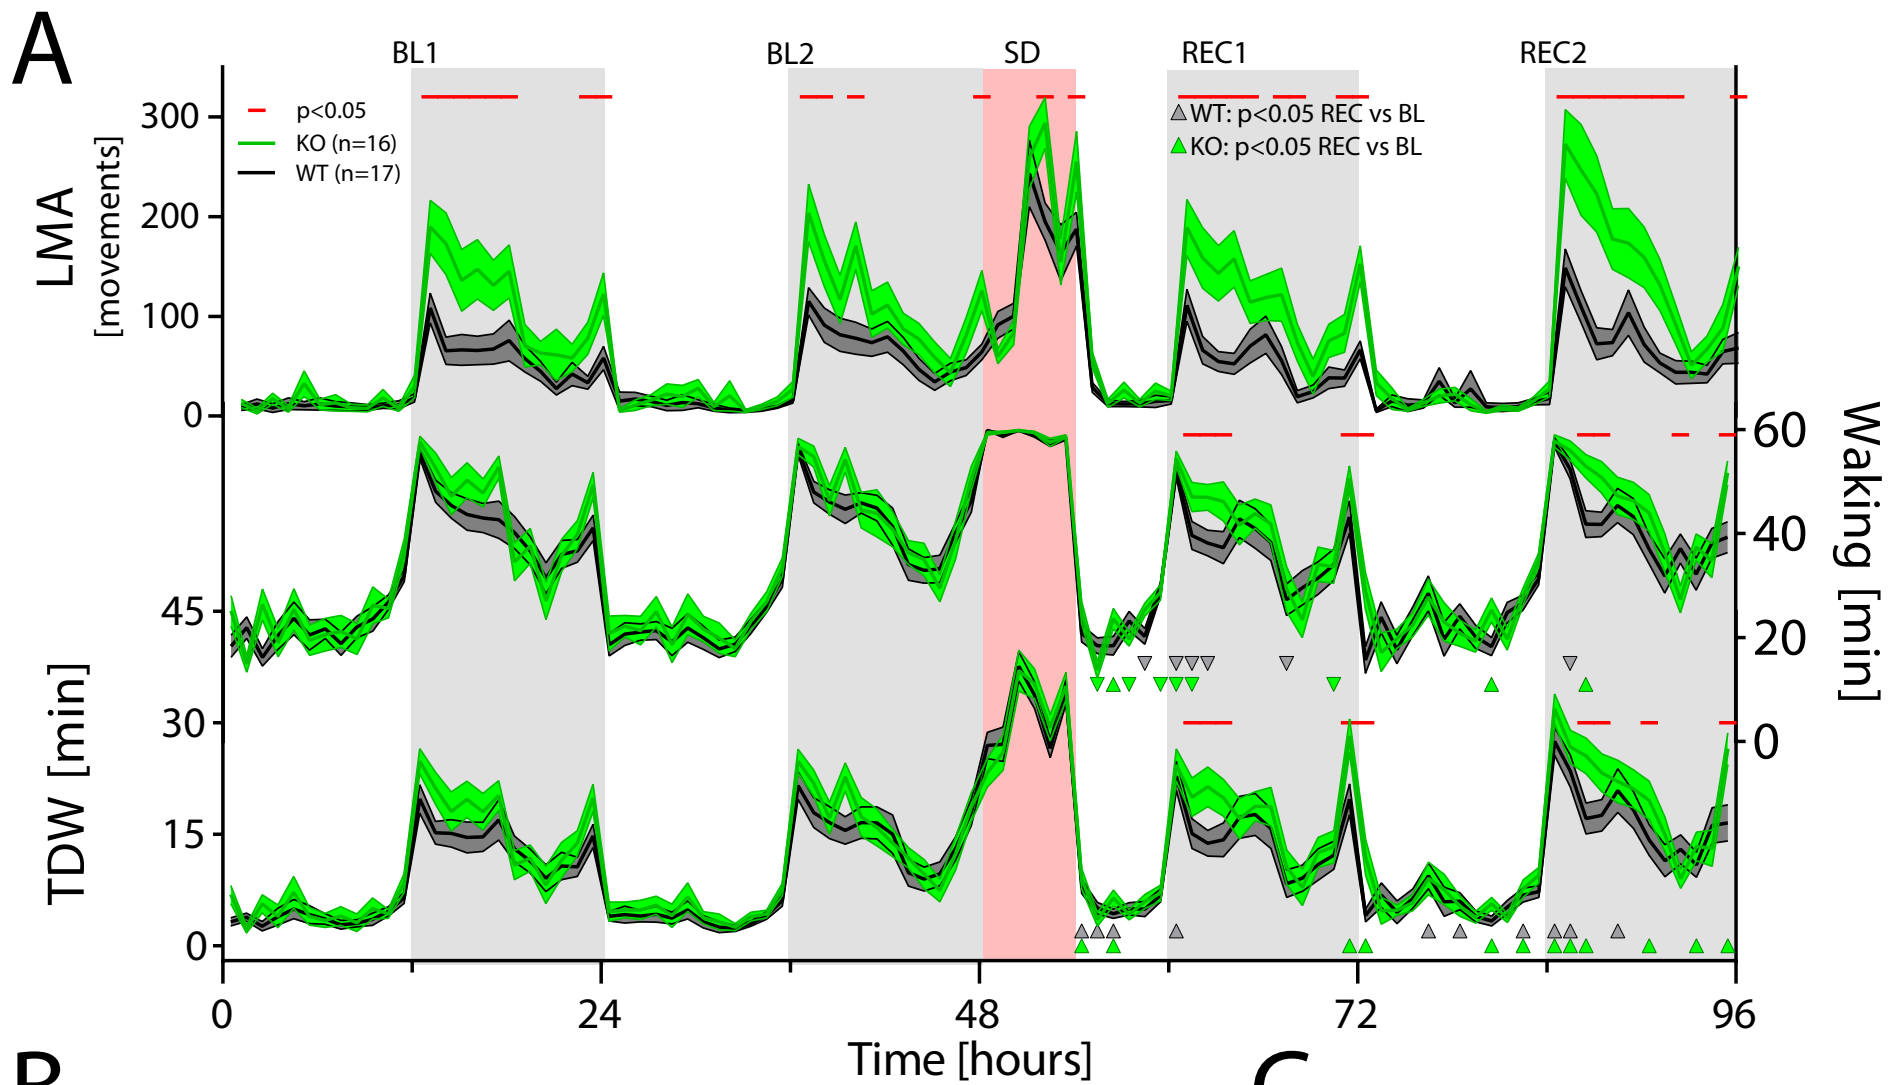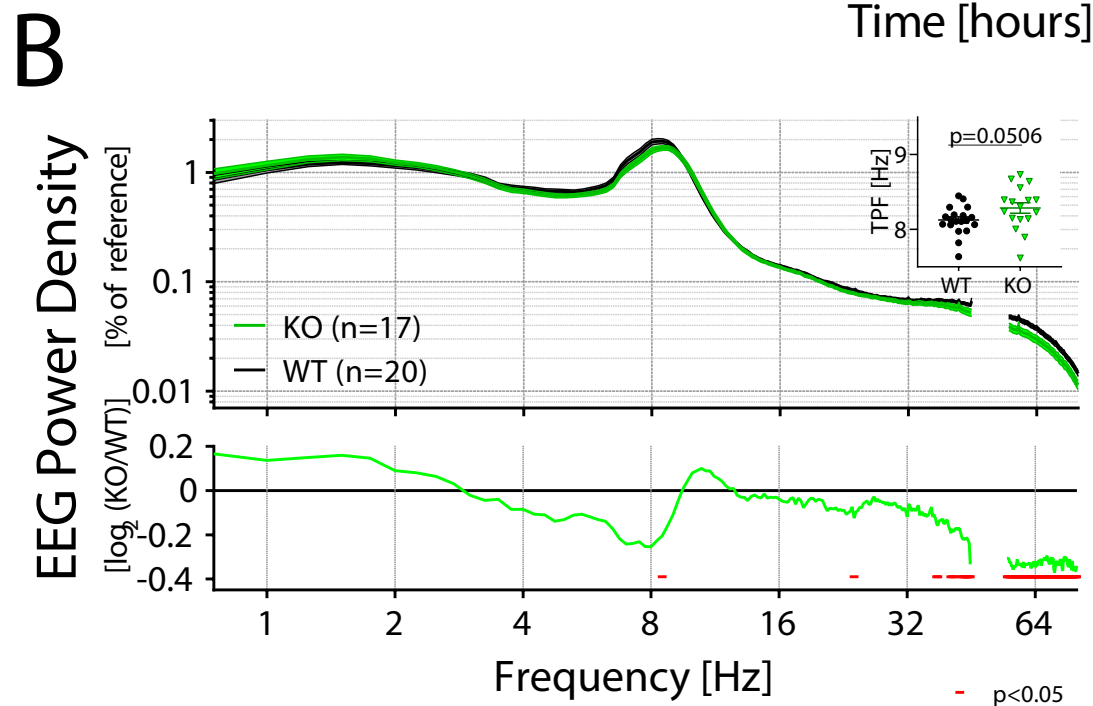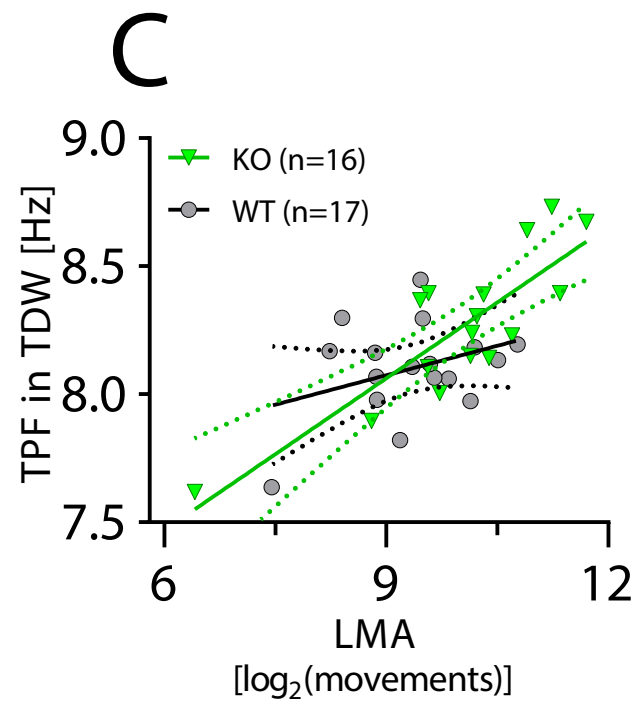

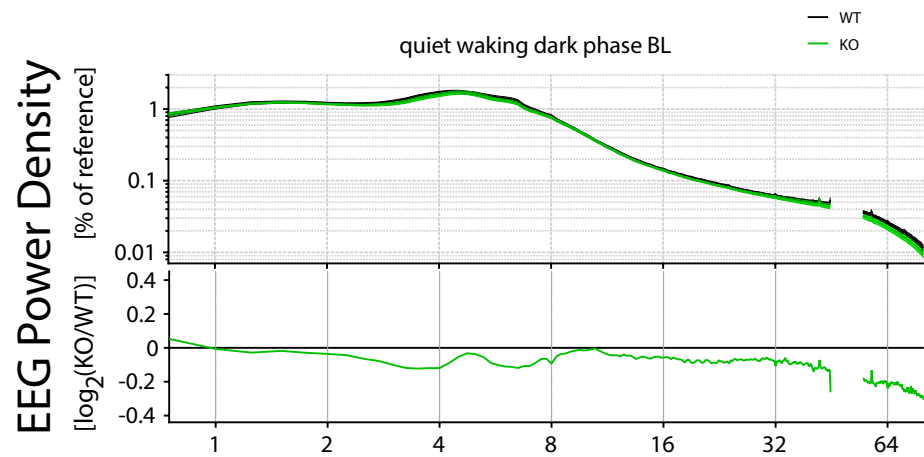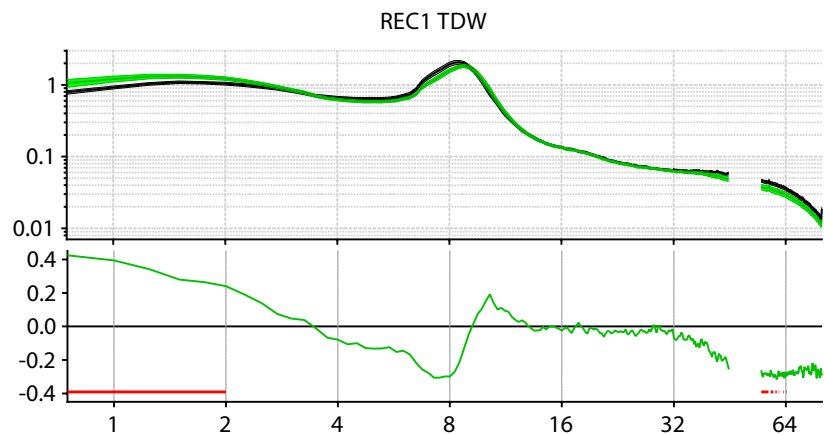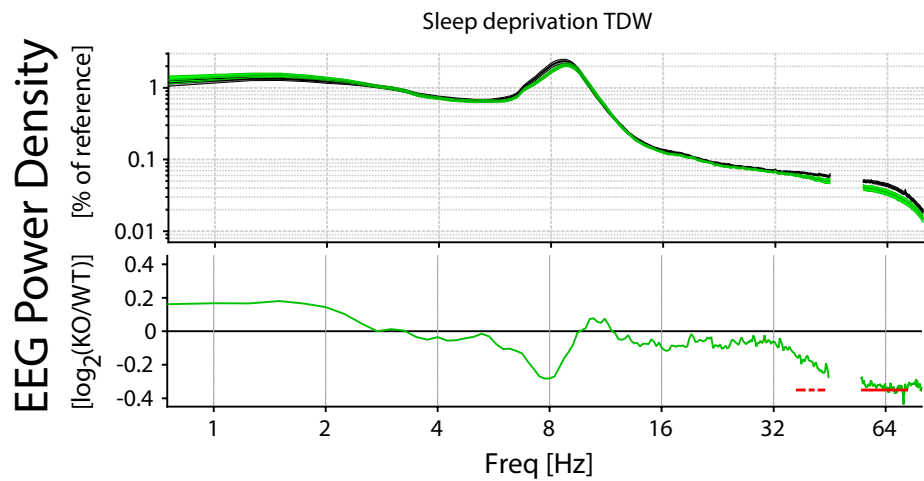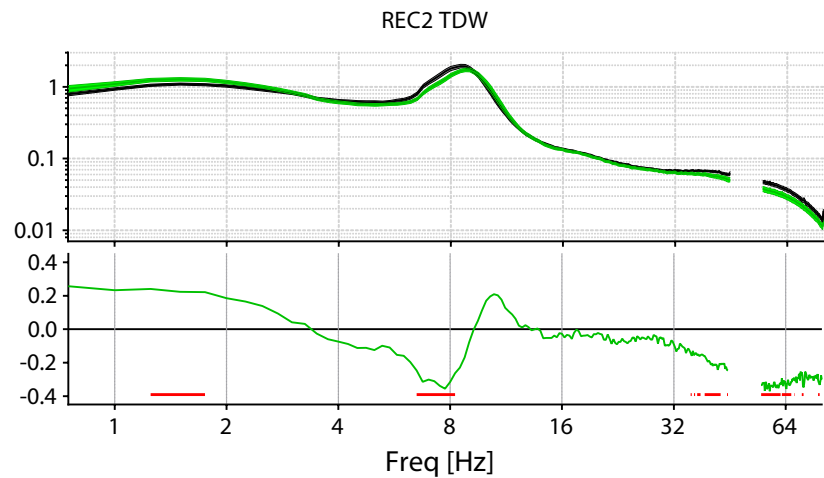

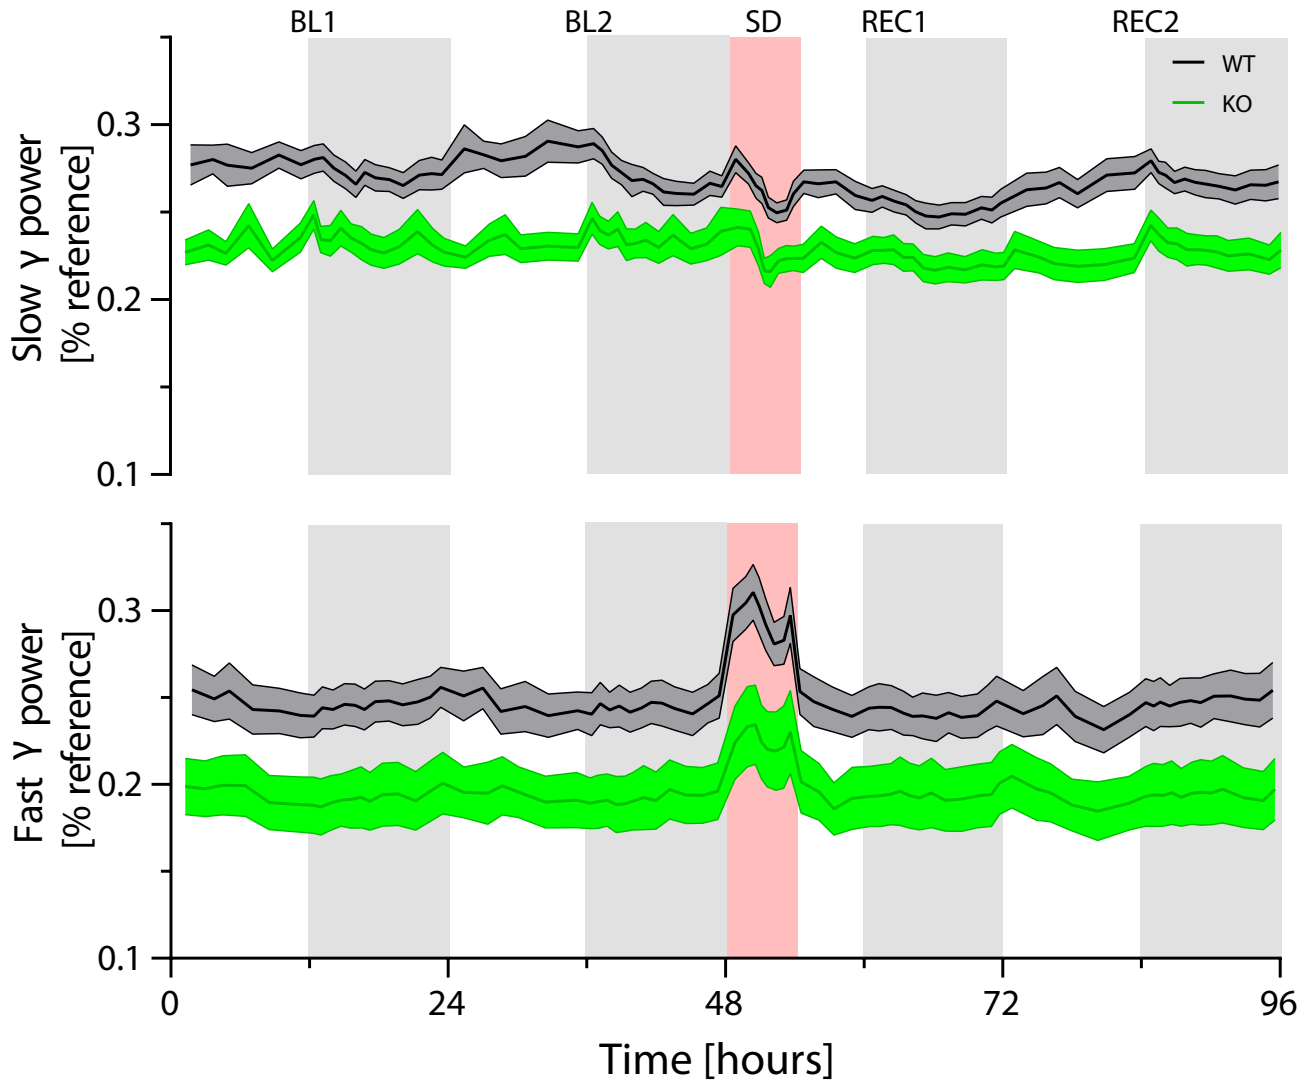



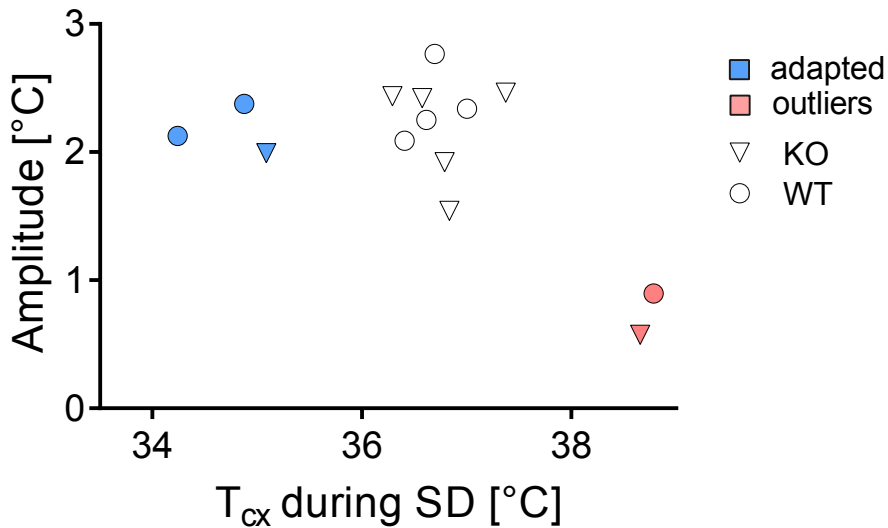

Source: http://biorxiv.org/content/10.1101/476911v2.full.pdf
